# Supplementary material
Source: PubMed Central journal article supplement (PMC3243075)

# Three-Component Reaction Discovery Enabled by Mass Spectrometry of Self-Assembled Monolayers

Timothy J. Montavon, Jing Li, Jaime R. Cabrera-Pardo, Milan Mrksich\* and Sergey A. Kozmin\*

*Chicago Tri-Institutional Center for Chemical Methods and Library Development  
Department of Chemistry, University of Chicago, Chicago, IL 60637*

## Supplementary Information

|                                                                        |            |
|------------------------------------------------------------------------|------------|
| <b>1. SAMDI Reaction Screening .....</b>                               | <b>S2</b>  |
| <b>Mass Spectrometry Data from SAMDI Screens .....</b>                 | <b>S2</b>  |
| <b>Materials for SAMDI Screening.....</b>                              | <b>S3</b>  |
| <b>2. Three Component Reaction Scope Studies .....</b>                 | <b>S3</b>  |
| <b>General Procedures for Organic Synthesis .....</b>                  | <b>S3</b>  |
| <b>Preparation of Siloxy Alkynes .....</b>                             | <b>S4</b>  |
| <b>Synthesis and Characterization of Three-Component Products.....</b> | <b>S5</b>  |
| <b>3. New Phosphine-Catalyzed Reactions .....</b>                      | <b>S15</b> |
| <b>Procedure for Acylation of Amines .....</b>                         | <b>S15</b> |
| <b>Procedure for the Acylation of 2,6-Diisopropylphenol.....</b>       | <b>S16</b> |
| <b>Procedure for the Acylation of Diethyl Malonate.....</b>            | <b>S16</b> |
| <b>4. Library Synthesis and Characterization .....</b>                 | <b>S17</b> |
| <b>General Procedure for the Synthesis of Library Compound.....</b>    | <b>S17</b> |
| <b>Purity Reports for All Library Compounds.....</b>                   | <b>S19</b> |
| <b>Characterization of Randomly Selected Library Members.....</b>      | <b>S54</b> |
| <b>5. Additional Product Characterization .....</b>                    | <b>S55</b> |
| <b>X-Ray Structure Determination of 5.....</b>                         | <b>S55</b> |
| <b>NMR Spectra of New Compounds .....</b>                              | <b>S60</b> |

# 1. SAMDI Reaction Screening

## Mass Spectrometry Data from SAMDI Screens

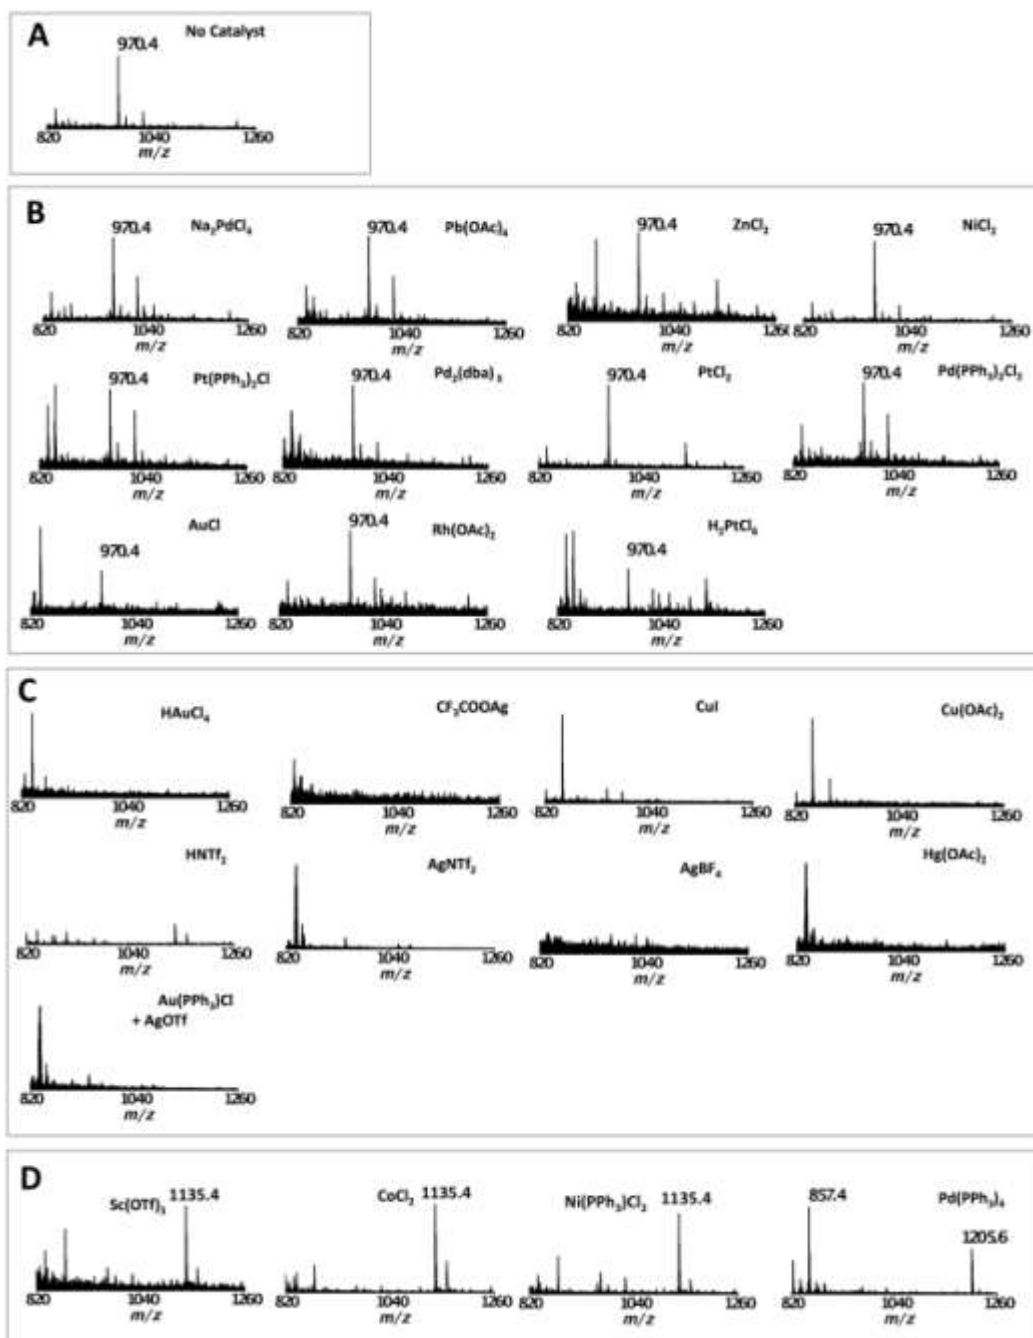

**Supplementary Figure S1.** Representative MALDI MS data of the three-component reaction screen. **A:** MALDI MS spectrum of the aldehyde-terminated monolayer, which was treated with 1-siloxy-1-hexyne (**2**) and 4-methoxy-

N-methyl aniline (**3**) in tetrahydrofuran, shows a major peak at  $m/z$  970.4. **B**: MALDI MS spectra of the aldehyde-terminated monolayer after treatment with siloxy alkyne **2** and aniline **3** in the presence of several representative additives show major peaks at  $m/z$  970.4, which is indicative of unreacted aldehyde. **C**: MALDI MS spectra of the aldehyde-terminated monolayer after treatment with siloxy alkyne **2** and aniline **3** in the presence of several additional additives shows disappearance of the peak at  $m/z$  970.4 without formation of any new peaks. **D**: MALDI MS spectra of the aldehyde-terminated monolayer after treatment with siloxy alkyne **2** and aniline **3** in the presence of four catalysts, which resulted in formation of new major peaks. The peak at  $m/z$  1135.4 (three spectra on the left) cannot be assigned at this point. The peaks at  $m/z$  857.4 and 1205.6 (spectrum on the right) correspond to the sodium adduct of an alkanethiolate terminated in a three-component product following loss of the triisopropylsilyl (TIPS) group as well as the sodium adduct of a mixed disulfide produced from this three-component product and the background methylether-terminated alkanethiolate.

## Materials for SAMDI Screening

Reagents and anhydrous solvents for SAMDI screening were used as received without further purification. Glass slides for gold deposition were obtained from Fisher Scientific. (Tridecafluoro-1,1,2,2-tetrahydrooctyl)-1-trichlorosilane was purchased from Pfaltz & Bauer (Waterbury, CT). Glove bags were purchased from Glas-Col (Terre Haute, IN). Amino-EG6-undecanethiol was purchased from Dojindo (Rockville, MD). The methyl ether-terminated alkanethiol with a tri(ethylene glycol) spacer was synthesized according to a previously reported procedure.<sup>1</sup>

## 2. Three Component Reaction Scope Studies

### General Procedures for Organic Synthesis

Hexanes (ACS grade), ethyl acetate (ACS grade), diethyl ether (ACS grade), and toluene (anhydrous) were purchased from Fisher Scientific and used without further purification. Tetrahydrofuran was distilled from sodium-benzophenone under a positive pressure of nitrogen. Unless otherwise noted, all reactions were performed under an inert atmosphere of nitrogen in flame-dried (10 x 75 mm) test tubes equipped with a stirbar and fitted with a rubber septum. Triisopropylsilyl trifluoromethanesulfonate (TIPSOTf) was distilled under reduced pressure over calcium hydride. 4-Methoxy-*N*-methylaniline was purified by flash chromatography prior to use (hexanes to 95:5 hexanes: EtOAc). Other commercially available reagents were obtained from Sigma-Aldrich, Strem, or Alfa Aesar Lancaster Synthesis and were used without further purification unless otherwise noted. Solution-phase reactions were monitored by thin layer chromatography (TLC) using Whatman precoated silica gel plates. Flash column chromatography was performed over Silacyle silica gel (230-400 mesh). <sup>1</sup>H NMR spectra were recorded on a Bruker DMX-500 instrument. Chemical shifts are reported in ppm from tetramethylsilane with the solvent resonance resulting from incomplete deuteration as the internal standard (CH<sub>3</sub>CN:  $\delta$  1.94 or CDCl<sub>3</sub>:  $\delta$  7.26). <sup>1</sup>H NMR spectra for three-component products were recorded at elevated temperatures to ensure the appearance of all proton signals. Data are reported as follows: chemical shift, multiplicity (s = singlet, d = doublet, t = triplet, q = quartet, ddd = doublet of doublet of doublets, br = broad, m = multiplet), coupling constants in

---

<sup>1</sup> Yeo, W. S.; Mrksich, M. *Langmuir* **2006**, 22, 10816-10820.

Hertz (Hz), and integration.  $^{13}\text{C}$  NMR spectra were recorded on a Bruker DMX-500 instrument using residual solvent peaks as internal standards ( $\text{CH}_3\text{CN}$ :  $\delta$  118.69 or  $\text{CDCl}_3$   $\delta$  77.23). High resolution mass spectra were recorded with a Waters Q-TOF Ultima tandem quadrupole/time-of-flight instrument.

### Preparation of Siloxy Alkynes

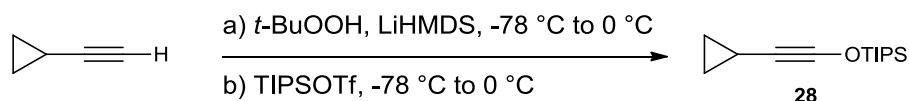

#### ((cyclopropylethynyl)oxy)triisopropylsilane (**28**).

A 500-mL flame-dried, three-necked, round-bottomed flask equipped with a stir bar, fitted with rubber septa and a nitrogen inlet was charged with THF (125 mL) and cyclopropylacetylene (3.22 mL, 38.0 mmol). The resulting solution was cooled to  $-78\text{ }^\circ\text{C}$  and anhydrous *t*-BuOOH (7.23 mL of a 5.78 M solution in nonane, 41.8 mmol) was added dropwise over a period of 10 minutes. CAUTION! SOLUTIONS OF OXIDANTS AND OXIDIZABLE SUBSTRATES ARE POTENTIALLY HAZARDOUS AND POSSIBLY SUBJECT TO VIOLENT DECOMPOSITION BY ADVENTITIOUS CATALYSIS. Freshly prepared LiHMDS (95.0 mL of a 1M solution in THF, 95.0 mmol) was added to the resulting mixture via syringe pump over a period of 30 minutes. The mixture was allowed to warm to  $0\text{ }^\circ\text{C}$  in an ice water bath, and was stirred for 2 h at this temperature. The reaction mixture was then cooled to  $-78\text{ }^\circ\text{C}$ , treated dropwise over a period of 10 min with TIPSOTf (11.23 mL, 41.8 mmol), and was allowed to stir for 5 min at this temperature. The reaction vessel was transferred to a  $0\text{ }^\circ\text{C}$  ice water bath and was allowed to stir for an additional 40 minutes before being diluted with hexanes (200 mL). The resulting mixture was transferred to a separatory funnel and was washed with saturated aqueous  $\text{NaHCO}_3$  (150 mL). The organic layer was collected, and the aqueous layer was extracted with hexanes (2 x 50 mL). The combined organic layers were washed with saturated aqueous  $\text{Na}_2\text{S}_2\text{O}_3$  (125 mL) and brine (100 mL). The organic layer was collected, dried with  $\text{MgSO}_4$ , filtered, and concentrated by rotary evaporation. The residue was purified by Kugelrohr distillation affording **28** as a clear oil (7.46 g, 31.3 mmol, 82 % yield). The synthesis and characterization of other siloxy alkynes used in this study has been previously reported.<sup>2,3,4,5</sup>  $^1\text{H}$  NMR (500 MHz,  $\text{CDCl}_3$ )  $\delta$  1.27-1.20 (m, 3H), 1.10 (d,  $J = 7.0$  Hz, 18H), 1.05-1.03 (m, 1H), 0.62-0.58 (m, 2H), 0.46-0.42 (m, 2H);  $^{13}\text{C}$  NMR (125 MHz,  $\text{CDCl}_3$ ) 82.7, 34.3, 17.5, 12.0, 7.9, -1.4; HRMS ( $\text{EI}^+$ ) calculated for  $\text{C}_{14}\text{H}_{27}\text{OSiF}[\text{M}]^+$  238.1753, found 238.1766.

<sup>2</sup> Schramm, M. P.; Shubinets, V.; Kozmin, S. A. *Org. Synth.* **2010**, 87, 253-263.

<sup>3</sup> Sun, J.; Keller, V. A.; Meyer, S. T.; Kozmin, S. A. *Adv. Synth. Catal.* **2010**, 352, 839-842.

<sup>4</sup> Sun, J.; Kozmin, S. A. *Angew. Chem. Int. Ed.* **2006**, 45, 4991-4993.

<sup>5</sup> Sweis, R.; Schramm, M. P.; Kozmin, S. A. *J. Am. Chem. Soc.* **2004**, 126, 7442-7443.

## Synthesis and Characterization of Three-Component Products

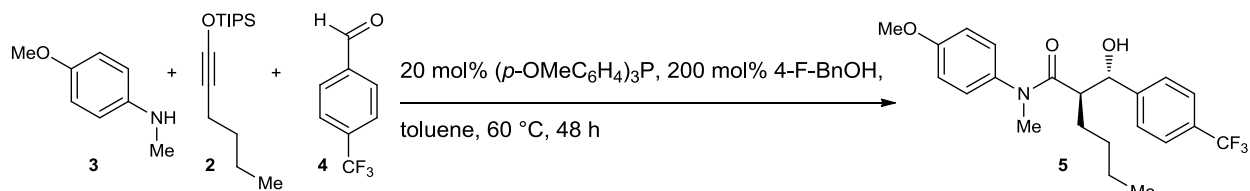

All three-component products were synthesized according to the general procedure detailed in the methods section of the manuscript. For the reaction of 4-trifluoromethylbenzaldehyde with siloxy alkyne **2** and aniline **3**, both diastereomers of the product were isolated and characterized. For all other three-component reactions, only the major, *anti*-diastereomers were fully characterized due to the difficulty of obtaining sufficient amounts of the purified minor diastereomers.

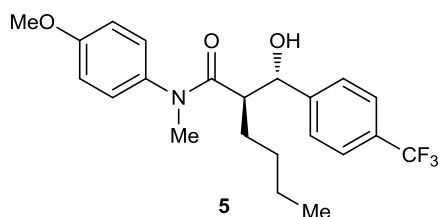

**(*RS*)-2-((*SR*)-hydroxy(4-(trifluoromethyl)phenyl)methyl)-*N*-(4-methoxyphenyl)-*N*-methylhexanamide (*anti*-**5**).** Following the standard procedure for three-component condensations, the reaction of 4-(trifluoromethyl)benzaldehyde (136.6  $\mu$ l, 1.00 mmol) afforded *anti*-**5** as a white solid (178.2 mg, 0.435 mmol, 87% yield) after purification by flash chromatography (hexanes to 85:15 hexanes:EtOAc). Crystallization of **5** was performed using hexanes:EtOAc (50:50). mp: 130-132 °C; <sup>1</sup>H NMR (500 MHz, CD<sub>3</sub>CN, 330 K)  $\delta$  7.65 (d, *J* = 8.5 Hz, 2H), 7.35 (d, *J* = 8.0 Hz, 2H), 6.83 (d, *J* = 8.5, 2H), 6.71-5.54 (m, 2H), 4.99 (d, *J* = 7.5 Hz, 1H), 4.71 (dd, *J* = 7.0, 5.0 Hz, 1H), 3.80 (s, 3H), 3.08 (s, 3H), 2.64-2.59 (m, 1H), 1.75-1.66 (m, 1H), 1.54-1.45 (m, 1H), 1.24-1.12 (m, 4H), 0.84 (t, *J* = 7.0 Hz, 3H); <sup>13</sup>C NMR (125 MHz, CD<sub>3</sub>CN)  $\delta$  176.0, 160.3, 150.5, 137.3, 130.1 (q, *J* = 31.8 Hz), 130.1, 128.1, 126.5 (q, *J* = 3.8 Hz), 125.9 (q, *J* = 269.5 Hz), 115.7, 75.6, 56.6, 48.9, 37.9, 31.5, 30.4, 23.7, 14.5; HRMS (ESI) calculated for C<sub>22</sub>H<sub>27</sub>NO<sub>3</sub>F<sub>3</sub> [M+H]<sup>+</sup> 410.1943, found 410.1950.

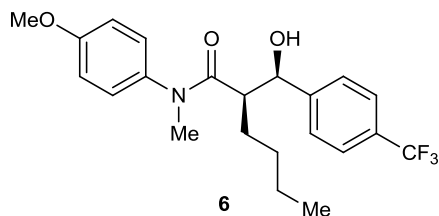

**(*RS*)-2-((*RS*)-hydroxy(4-(trifluoromethyl)phenyl)methyl)-*N*-(4-methoxyphenyl)-*N*-methylhexanamide (*syn*-**6**).** Following the standard procedure for three-component condensations, the reaction of 4-(trifluoromethyl)benzaldehyde (136.6  $\mu$ l, 1.00 mmol) afforded *syn*-**6** as a white solid (5.5 mg, 0.013 mmol, 3% yield) after purification by flash chromatography (hexanes to 85:15 hexanes:EtOAc) and preparative TLC (70:30

hexanes:EtOAc).  $^1\text{H}$  NMR (500 MHz,  $\text{CD}_3\text{CN}$ , 330 K)  $\delta$  7.61 (d,  $J = 8.5$  Hz, 2H), 7.33 (d,  $J = 8.0$  Hz, 2H), 6.92 (d,  $J = 9.0$  Hz, 2H), 6.86-6.78 (m, 2H), 4.93-4.89 (m, 1H), 4.10 (d,  $J = 2.5$  Hz, 1H), 3.82 (s, 3H), 3.13 (s, 3H), 2.63-2.57 (m, 1H), 1.75-1.65 (m, 1H), 1.41-1.33 (m, 1H), 1.22-1.05 (m, 3H), 1.02-0.92 (m, 1H), 0.79 (t,  $J = 7.5$  Hz, 3H);  $^{13}\text{C}$  NMR (125 MHz,  $\text{CD}_3\text{CN}$ ) 175.8, 160.4, 149.1, 137.5, 130.2, 129.9 (q,  $J = 31.8$  Hz), 128.0, 126.2 (q,  $J = 3.8$  Hz), 125.9 (q,  $J = 269.4$  Hz), 115.9, 74.7, 56.6, 50.0, 38.0, 30.7, 28.5, 23.9, 14.5; HRMS (ESI) calculated for  $\text{C}_{22}\text{H}_{27}\text{NO}_3$   $[\text{M}+\text{H}]^+$  410.1943, found 410.1946.

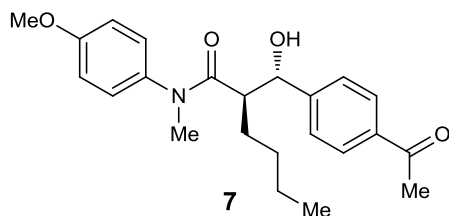

**(*RS*)-2-((*SR*)-(4-acetylphenyl)(hydroxy)methyl)-*N*-(4-methoxyphenyl)-*N*-methylhexanamide (*anti*-7).** Following the standard procedure for three-component condensations, the reaction of 4-acetylbenzaldehyde (148.2 mg, 1.00 mmol) afforded *anti*-7 as a white solid (167.2 mg, 0.436 mmol, 87% yield) after purification by flash chromatography (hexanes to 4:1 hexanes:EtOAc)  $^1\text{H}$  NMR (500 MHz,  $\text{CD}_3\text{CN}$ , 330 K)  $\delta$  7.92 (d,  $J = 8.0$  Hz, 2H), 7.28 (d,  $J = 8.0$  Hz, 2H), 6.84 (d,  $J = 8.5$  Hz, 2H), 6.70-6.58 (m, 2H), 4.94 (d,  $J = 7.5$  Hz, 1H), 4.69 (dd,  $J = 7.5, 5.0$  Hz, 1H), 3.80 (s, 3H), 3.08 (s, 3H), 2.71-2.61 (m, 1H), 2.58 (s, 3H), 1.73-1.66 (m, 1H), 1.52-1.48 (m, 1H), 1.22-1.10 (m, 4H), 0.83 (t,  $J = 7.0$  Hz, 3H);  $^{13}\text{C}$  NMR (125 MHz,  $\text{CD}_3\text{CN}$ )  $\delta$  199.0, 176.1, 160.3, 151.1, 137.7, 137.4, 130.2, 129.6, 127.7, 115.7, 75.8, 56.5, 48.8, 37.8, 31.5, 30.4, 27.5, 23.7, 14.5; HRMS (ESI) calculated for  $\text{C}_{23}\text{H}_{30}\text{NO}_4$   $[\text{M}+\text{H}]^+$  384.2175, found 384.2178.

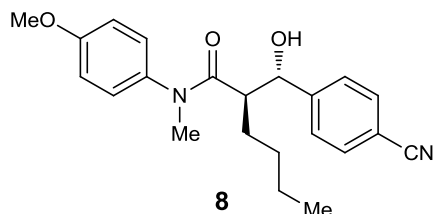

**(*RS*)-2-((*SR*)-(4-cyanophenyl)(hydroxy)methyl)-*N*-(4-methoxyphenyl)-*N*-methylhexanamide (*anti*-8).** Following the standard procedure for three-component condensations, the reaction of 4-formylbenzotrile (131.1 mg, 1.00 mmol) afforded *anti*-8 (133.3 mg, 0.364 mmol, 73% yield) as a white solid after purification by flash chromatography (hexanes to 4:1 hexanes:EtOAc).  $^1\text{H}$  NMR (500 MHz,  $\text{CD}_3\text{CN}$ , 330 K)  $\delta$  7.68 (d,  $J = 8.0$  Hz, 2H), 7.32 (d,  $J = 8.0$  Hz, 2H), 6.87 (d,  $J = 8.0$  Hz, 2H), 6.73-6.57 (m, 2H), 5.04 (d,  $J = 8.0$  Hz, 1H), 4.69 (dd,  $J = 7.5, 4.5$  Hz, 1H), 3.81 (s, 3H), 3.07 (s, 3H), 2.61 (ddd,  $J = 7.5, 6.5, 6.0$  Hz, 1H), 1.72-1.65 (m, 1H), 1.53-1.47 (m, 1H), 1.23-1.13 (m, 4H), 0.83 (t,  $J = 7.0$  Hz, 3H);  $^{13}\text{C}$  NMR (125 MHz,  $\text{CD}_3\text{CN}$ )  $\delta$  175.9, 160.3, 151.4, 137.2, 133.5, 130.1, 128.4, 120.2, 115.8, 112.0, 75.5, 56.6, 48.6, 37.8, 31.4, 30.4, 23.6, 14.5; HRMS (ESI) calculated for  $\text{C}_{22}\text{H}_{27}\text{N}_2\text{O}_3$   $[\text{M}+\text{H}]^+$  367.2022, found 367.2024.

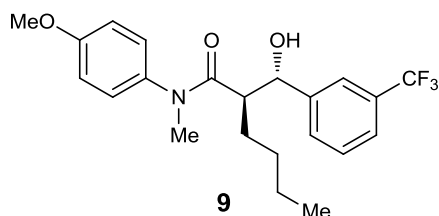

**(*RS*)-2-((*SR*)-hydroxy(3-(trifluoromethyl)phenyl)methyl)-*N*-(4-methoxyphenyl)-*N*-methylhexanamide (*anti*-9).** Following the standard procedure for three-component condensations, the reaction of 3-(trifluoromethyl)benzaldehyde (131.1  $\mu\text{L}$ , 1.00 mmol) afforded *anti*-9 (129.3 mg, 0.316 mmol, 63% yield) as a white solid after purification by flash chromatography (hexanes to 9:1 hexanes:EtOAc).  $^1\text{H}$  NMR (500 MHz,  $\text{CD}_3\text{CN}$ , 330 K)  $\delta$  7.62 (d,  $J = 7.5$  Hz, 1H), 7.54 (t,  $J = 7.5$  Hz, 1H), 7.46-7.43 (m, 2H), 6.83 (d,  $J = 9.0$  Hz, 2H), 6.67-6.50 (m, 2H), 5.05 (d,  $J = 8.0$  Hz, 1H), 4.71 (dd,  $J = 7.5, 4.5$  Hz, 1H), 3.79 (s, 3H), 3.06 (s, 3H), 2.60 (ddd,  $J = 6.0, 5.5, 5.0$  Hz, 1H), 1.75-1.66 (m, 1H), 1.57-1.48 (m, 1H), 1.23-1.13 (m, 4H), 0.84 (t,  $J = 7.0$  Hz, 3H);  $^{13}\text{C}$  NMR (125 MHz,  $\text{CD}_3\text{CN}$ )  $\delta$  176.1, 160.3, 147.3, 137.3, 131.3, 131.2 (q,  $J = 31.5$  Hz), 130.5, 130.0, 125.9 (q,  $J = 269.9$  Hz), 125.3 (q,  $J = 3.8$  Hz), 124.2 (q,  $J = 3.8$  Hz), 115.7, 75.5, 56.5, 48.9, 37.8, 31.5, 30.4, 23.7, 14.5; HRMS (ESI) calculated for  $\text{C}_{22}\text{H}_{27}\text{NO}_3\text{F}_3$   $[\text{M}+\text{H}]^+$  410.1943, found 410.1943.

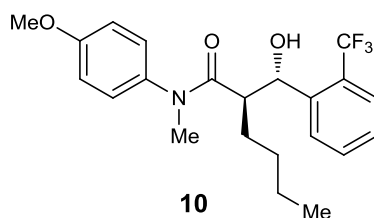

**(*RS*)-2-((*SR*)-hydroxy(2-(trifluoromethyl)phenyl)methyl)-*N*-(4-methoxyphenyl)-*N*-methylhexanamide (*anti*-10).** Following the standard procedure for three-component condensations, the reaction of 2-(trifluoromethyl)benzaldehyde (131.9  $\mu\text{L}$ , 1.00 mmol) afforded *anti*-10 (150.6 mg, 0.368 mmol, 74% yield) as a white solid after purification by flash chromatography (hexanes to 85:15 hexanes:EtOAc).  $^1\text{H}$  NMR (500 MHz,  $\text{CD}_3\text{CN}$ , 345 K)  $\delta$  7.69-7.65 (m, 2H), 7.62 (d,  $J = 7.5$  Hz, 1H), 7.51 (t,  $J = 7.5$  Hz, 1H), 6.77 (d,  $J = 8.5$  Hz, 2H), 6.50-6.28 (m, 2H), 5.28 (d,  $J = 7.5$  Hz, 1H), 5.07-5.03 (m, 1H), 3.78 (s, 3H), 3.10 (s, 3H), 2.72-2.66 (m, 1H), 1.82-1.74 (m, 1H), 1.57-1.50 (m, 1H), 1.25-1.13 (m, 4H), 0.85 (t,  $J = 7.0$  Hz, 3H);  $^{13}\text{C}$  NMR (125 MHz,  $\text{CD}_3\text{CN}$ )  $\delta$  176.1, 160.3, 144.6, 137.2, 133.8, 129.8, 129.3, 129.2, 127.8 (q,  $J = 29.8$  Hz), 127.11 (q,  $J = 6.3$  Hz), 125.8 (q,  $J = 272.5$  Hz), 115.7, 71.7, 56.6, 48.0, 37.8, 31.9, 30.4, 23.6, 14.5; HRMS (ESI) calculated for  $\text{C}_{22}\text{H}_{27}\text{NO}_3\text{F}_3$   $[\text{M}+\text{H}]^+$  410.1943, found 410.1942.

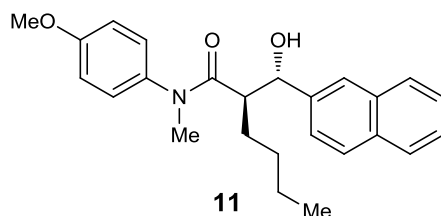

**(*RS*)-2-((*SR*)-hydroxy(naphthalen-2-yl)methyl)-*N*-(4-methoxyphenyl)-*N*-methylhexanamide (*anti*-11).** Following the standard procedure for three-component condensations, the reaction of 2-naphthaldehyde (156.2 mg, 1.00 mmol) afforded *anti*-11 (134.0 mg, 0.342 mmol, 68% yield) as a white solid after purification by flash chromatography (hexanes to 90:10 hexanes:EtOAc).  $^1\text{H}$  NMR (500 MHz,  $\text{CD}_3\text{CN}$ , 330 K)  $\delta$  7.92-7.88 (m, 1H), 7.87-7.83 (m, 2H), 7.66 (s, 1H), 7.54-7.49 (m, 2H), 7.29 (dd,  $J = 8.5, 1.5$  Hz, 1H), 6.73 (d,  $J = 8.5$  Hz, 2H), 6.65-6.48 (m, 2H), 4.85 (d,  $J = 7.5$  Hz, 1H), 4.81-4.77 (m, 1H), 3.78 (s, 3H), 3.06 (s, 3H), 2.75-2.71 (m, 1H), 1.76-1.68 (m, 1H), 1.52-1.45 (m, 1H) 1.25-1.14 (m, 4H), 0.82 (t,  $J = 7.0$  Hz, 3H);  $^{13}\text{C}$  NMR (125 MHz,  $\text{CD}_3\text{CN}$ )  $\delta$  176.3, 160.1, 143.3, 137.5, 134.6, 134.2, 130.2, 129.2, 129.1, 129.0, 127.6, 127.2, 126.2, 125.8, 115.5, 76.5, 56.5, 49.0, 37.8, 31.7, 30.4, 23.7, 14.5; HRMS (ESI) calculated for  $\text{C}_{25}\text{H}_{30}\text{NO}_3$   $[\text{M}+\text{H}]^+$  392.2226, found 392.2228

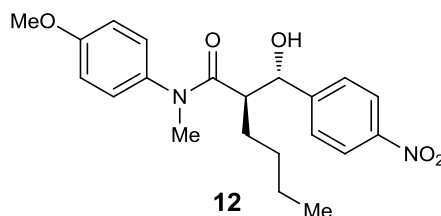

**(*RS*)-2-((*SR*)-hydroxy(4-nitrophenyl)methyl)-*N*-(4-methoxyphenyl)-*N*-methylhexanamide (*anti*-12).** Following the standard procedure for three-component condensations, the reaction of 4-nitrobenzaldehyde (151.1 mg, 1.00 mmol) afforded *anti*-12 (127.0 mg, 0.329 mmol, 66% yield) as a white solid after purification by flash chromatography (hexanes to 9:1 hexanes:EtOAc).  $^1\text{H}$  NMR (500 MHz,  $\text{CD}_3\text{CN}$ , 330 K)  $\delta$  8.17 (d,  $J = 8.5$  Hz, 2H), 7.39 (d,  $J = 9.0$  Hz, 2H), 6.86 (d,  $J = 9.0$  Hz, 2H), 6.75-6.59 (m, 2H), 5.10 (d,  $J = 7.5$  Hz, 1H), 4.75 (dd,  $J = 7.5, 5.0$  Hz, 1H), 3.80 (s, 3H), 3.07 (s, 3H), 2.66-2.60 (m, 1H), 1.75-1.67 (m, 1H), 1.57-1.49 (m, 1H), 1.23-1.13 (m, 4H), 0.84 (t,  $J = 7.0$  Hz, 3H);  $^{13}\text{C}$  NMR (125 MHz,  $\text{CD}_3\text{CN}$ )  $\delta$  175.9, 160.3, 153.5, 148.7, 137.2, 130.1, 128.5, 124.7, 115.8, 75.3, 56.6, 48.6, 37.8, 31.4, 30.4, 23.6, 14.5; HRMS (ESI) calculated for  $\text{C}_{21}\text{H}_{27}\text{N}_2\text{O}_5$   $[\text{M}+\text{H}]^+$  387.1920, found 387.1915.

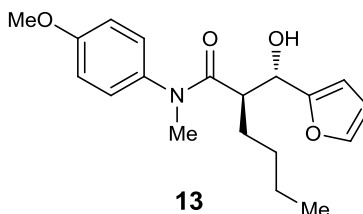

**(*RS*)-2-((*SR*)-furan-2-yl(hydroxy)methyl)-*N*-(4-methoxyphenyl)-*N*-methylhexanamide (*anti*-13).** Following the standard procedure for three-component condensations, the reaction of 2-furaldehyde (82.9  $\mu\text{L}$ , 1.00 mmol) afforded *anti*-13 (97.8 mg, 0.295 mmol, 59% yield) as a white



solid after purification by flash chromatography (hexanes to 85:15 hexanes:EtOAc).  $^1\text{H}$  NMR (500 MHz,  $\text{CD}_3\text{CN}$ , 310 K)  $\delta$  7.42 (d,  $J = 2.5$  Hz, 1H), 6.95-6.92 (m, 4H), 6.37 (dd,  $J = 3.5, 3.0$  Hz, 1H), 6.20 (d,  $J = 3.0$  Hz, 1H), 4.65-4.62 (m, 1H), 4.56 (d,  $J = 7.5$  Hz, 1H), 3.81 (s, 3H), 3.15 (s, 3H), 2.78-2.74 (ddd,  $J = 8.0, 6.5, 6.0$  Hz, 1H), 1.60-1.53 (m, 1H), 1.36-1.29 (m, 1H), 1.15-1.07 (m, 4H), 0.81 (t,  $J = 7.0$  Hz, 3H);  $^{13}\text{C}$  NMR (125 MHz,  $\text{CD}_3\text{CN}$ )  $\delta$  176.2, 160.3, 158.0, 143.1, 137.8, 130.4, 115.8, 111.7, 107.8, 70.3, 56.6, 46.7, 38.0, 31.1, 30.3, 23.7, 14.5; HRMS (ESI) calculated for  $\text{C}_{19}\text{H}_{26}\text{NO}_4$   $[\text{M}+\text{H}]^+$  332.1862, found 332.1868.

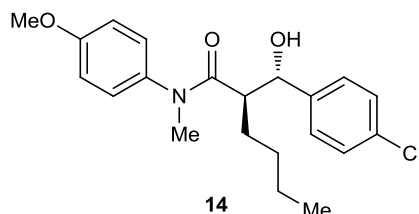

**(*RS*)-2-((*SR*)-(4-chlorophenyl)(hydroxy)methyl)-*N*-(4-methoxyphenyl)-*N*-methylhexanamide (*anti*-14).** Following the standard procedure for three-component condensations, the reaction of 4-chlorobenzaldehyde (140.6 mg, 1.00 mmol) afforded *anti*-14 (119.1 mg, 0.317 mmol, 63% yield) as a white solid after purification by flash chromatography (hexanes to 85:15 hexanes:EtOAc).  $^1\text{H}$  NMR (500 MHz,  $\text{CD}_3\text{CN}$ , 330 K)  $\delta$  7.34 (d,  $J = 8.5$  Hz, 2H), 7.15 (d,  $J = 8.0$  Hz, 2H), 6.86 (d,  $J = 9.0$  Hz, 2H), 6.77-6.63 (m, 2H), 4.82 (d,  $J = 7.5$  Hz, 1H), 4.62 (dd,  $J = 7.0, 5.5$  Hz, 1H), 3.80 (s, 3H), 3.09 (s, 3H), 2.59 (ddd,  $J = 8.0, 7.0, 5.5$  Hz, 1H), 1.70-1.62 (m, 1H), 1.47-1.39 (m, 1H), 1.21-1.08 (m, 4H), 0.82 (t,  $J = 7.0$  Hz, 3H);  $^{13}\text{C}$  NMR (125 MHz,  $\text{CD}_3\text{CN}$ )  $\delta$  176.1, 160.3, 144.7, 137.5, 133.7, 130.2, 129.5, 129.2, 115.7, 75.6, 56.6, 49.0, 37.9, 31.5, 30.4, 23.7, 14.5; HRMS (ESI) calculated for  $\text{C}_{21}\text{H}_{27}\text{NO}_3\text{Cl}$   $[\text{M}+\text{H}]^+$  376.1679, found 376.1679.

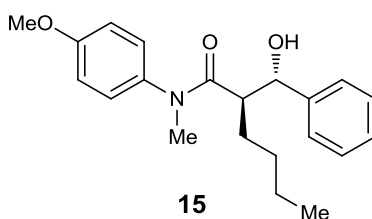

**(*RS*)-2-((*SR*)-hydroxy(phenyl)methyl)-*N*-(4-methoxyphenyl)-*N*-methylhexanamide (*anti*-15).** Following the standard procedure for three-component condensations, the reaction of benzaldehyde (101.1  $\mu\text{L}$ , 1.00 mmol) afforded *anti*-15 (99.3 mg, 0.291 mmol, 58% yield) as a white solid after purification by flash chromatography (hexanes to 9:1 hexanes:EtOAc).  $^1\text{H}$  NMR (500 MHz,  $\text{CD}_3\text{CN}$ , 330 K)  $\delta$  7.35-7.27 (m, 3H), 7.16 (m, 2H), 6.83 (d,  $J = 9.0$  Hz, 2H), 6.72-6.55 (m, 2H), 4.76 (d,  $J = 7.5$  Hz, 1H), 4.63-4.60 (m, 1H), 3.80 (s, 3H), 3.08 (s, 3H), 2.62-2.58 (ddd,  $J = 8.0, 7.0, 5.5$  Hz, 1H), 1.72-1.64 (m, 1H), 1.47-1.39 (m, 1H), 1.21-1.11 (m, 4H), 0.81 (t,  $J = 7.0$  Hz, 3H);  $^{13}\text{C}$  NMR (125 MHz,  $\text{CD}_3\text{CN}$ )  $\delta$  176.3, 160.2, 145.9, 137.6, 130.3, 129.6, 128.6, 127.5, 115.6, 76.4, 56.5, 49.2, 37.8, 31.7, 30.5, 23.7, 14.5; HRMS (ESI) calculated for  $\text{C}_{21}\text{H}_{28}\text{NO}_3$   $[\text{M}+\text{H}]^+$  342.2069, found 342.2073.

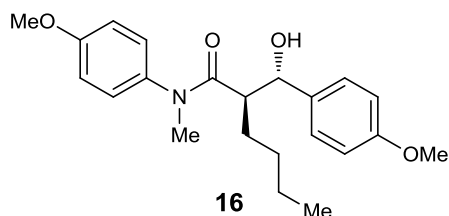

**(*RS*)-2-((*SR*)-hydroxy(4-methoxyphenyl)methyl)-*N*-(4-methoxyphenyl)-*N*-methylhexanamide (*anti*-16).** Following the standard procedure for three-component condensations, the reaction of *p*-anisaldehyde (121.7  $\mu$ L, 1.00 mmol) afforded *anti*-16 (82.0 mg, 0.221 mmol, 44% yield) as a white solid after purification by flash chromatography (hexanes to 4:1 hexanes:EtOAc).  $^1\text{H}$  NMR (500 MHz,  $\text{CD}_3\text{CN}$ , 330 K)  $\delta$  7.07 (d,  $J = 8.5$  Hz, 2H), 6.90-6.85 (m, 4H), 6.77-6.68 (m, 2H), 4.57-4.54 (m, 2H), 3.80 (m, 6H), 3.10 (s, 3H) 2.61-2.56 (m, 1H), 1.68-1.59 (m, 1H), 1.41-1.33 (m, 1H), 1.20-1.07 (m, 4H), 0.81 (t,  $J = 7.0$  Hz, 3H);  $^{13}\text{C}$  NMR (125 MHz,  $\text{CD}_3\text{CN}$ )  $\delta$  176.4, 160.4, 160.2, 137.9, 137.7, 130.4, 128.7, 115.6, 114.8, 76.1, 56.5, 56.3, 49.4, 37.9, 31.6, 30.5, 23.7, 14.5; HRMS (ESI) calculated for  $\text{C}_{22}\text{H}_{30}\text{NO}_4$   $[\text{M}+\text{H}]^+$  372.2175, found 372.2178.

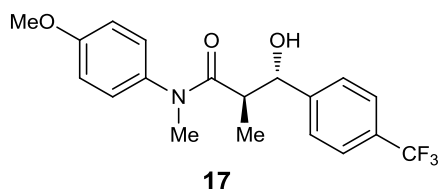

**(*2RS,3SR*)-3-hydroxy-*N*-(4-methoxyphenyl)-*N,2*-dimethyl-3-(4-(trifluoromethyl)phenyl)propanamide (*anti*-17).** Following the standard procedure for three-component condensations, the reaction of 1-siloxy-1-propyne (159.3 mg, 0.750 mmol) afforded *anti*-17 (138.5 mg, 0.377 mmol, 75% yield) as a white solid after purification by flash chromatography (hexanes to 4:1 hexanes:EtOAc).  $^1\text{H}$  NMR (500 MHz,  $\text{CD}_3\text{CN}$ , 315 K)  $\delta$  7.63 (d,  $J = 8.0$  Hz, 2H), 7.34 (d,  $J = 8.0$  Hz, 2H), 6.88 (d,  $J = 8.0$  Hz, 2H), 6.82-6.71 (m, 2H), 4.83 (d,  $J = 7.0$  Hz, 1H), 4.66-4.61 (m, 1H), 3.80 (s, 3H), 3.06 (s, 3H), 2.71-2.64 (m, 1H), 1.06 (d,  $J = 7.0$  Hz, 3H);  $^{13}\text{C}$  NMR (125 MHz,  $\text{CD}_3\text{CN}$ )  $\delta$  176.6, 160.4, 150.2, 137.5, 130.1 (q,  $J = 31.6$  Hz), 129.7, 128.0, 126.4 (q,  $J = 3.8$  Hz), 125.9 (q,  $J = 269.8$  Hz), 115.9, 77.1, 56.6, 43.7, 37.7, 16.4; HRMS (ESI) calculated for  $\text{C}_{19}\text{H}_{21}\text{NO}_3\text{F}_3$   $[\text{M}+\text{H}]^+$  368.1474, found 368.1479.

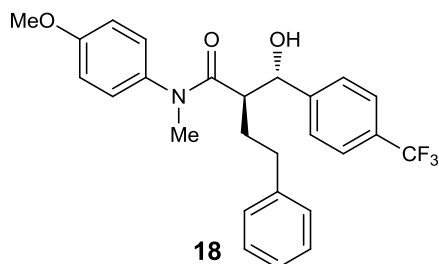

**(*RS*)-2-((*SR*)-hydroxy(4-(trifluoromethyl)phenyl)methyl)-*N*-(4-methoxyphenyl)-*N*-methyl-4-phenylbutanamide (*anti*-18).** Following the standard procedure for three-component condensations, the reaction of siloxy alkyne **29** (226.9 mg, 0.750 mmol) afforded *anti*-18 (165.0

mg, 0.361 mmol, 72% yield) after purification by flash chromatography (hexanes to 9:1 hexanes:EtOAc).  $^1\text{H}$  NMR (500 MHz,  $\text{CD}_3\text{CN}$ , 330 K)  $\delta$  7.63 (d,  $J = 8.0$  Hz, 2H), 7.30 (d,  $J = 8.0$  Hz, 2H), 7.22 (t,  $J = 7.5$  Hz, 2H), 7.16 (t,  $J = 7.5$  Hz, 1H), 7.06 (d,  $J = 7.5$  Hz, 2H), 6.77 (d,  $J = 9.0$  Hz, 2H), 6.63-6.52 (m, 2H), 5.11 (d,  $J = 7.5$  Hz, 1H), 4.80 (dd,  $J = 7.5, 4.5$  Hz, 1H), 3.80 (s, 3H), 3.07 (s, 3H), 2.67 (ddd,  $J = 9.5, 5.0, 4.5$  Hz, 1H), 2.60-2.53 (m, 2H), 2.10-1.87 (d, 2H);  $^{13}\text{C}$  NMR (125 MHz,  $\text{CD}_3\text{CN}$ )  $\delta$  175.8, 160.3, 150.3, 142.8, 137.1, 130.1 (q,  $J = 31.8$  Hz), 129.9, 129.7, 129.6, 128.3, 127.3, 126.5 (q,  $J = 3.6$  Hz), 125.9 (q,  $J = 269.6$  Hz), 115.8, 74.8, 56.6, 48.2, 37.9, 34.0, 33.0; HRMS (ESI) calculated for  $\text{C}_{26}\text{H}_{27}\text{NO}_3\text{F}_3$   $[\text{M}+\text{H}]^+$  458.1943, found 458.1956.

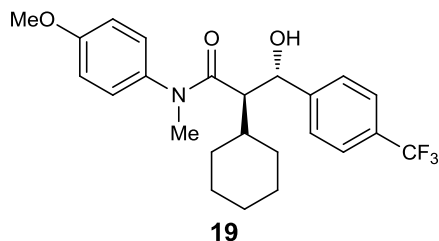

**(2RS,3SR)-2-cyclohexyl-3-hydroxy-N-(4-methoxyphenyl)-N-methyl-3-(4-(trifluoromethyl)phenyl)propanamide (anti-19).** Following the standard procedure for three-component condensations, the reaction of 2-cyclohexyl-1-siloxy-ethyne (210.4 mg, 0.750 mmol) afforded **anti-19** (175.5 mg, 0.398 mmol, 80% yield) as a white solid after purification by flash chromatography (hexanes to 9:1 hexanes:EtOAc).  $^1\text{H}$  NMR (500 MHz,  $\text{CD}_3\text{CN}$ , 350 K)  $\delta$  7.68 (d,  $J = 8.0$  Hz, 2H), 7.34 (d,  $J = 8.0$  Hz, 2H), 6.72 (d,  $J = 8.5$  Hz, 2H), 6.36-6.06 (m, 2H), 5.52 (d,  $J = 9.0$  Hz, 1H), 4.93-4.88 (m, 1H), 3.78 (s, 3H), 3.03 (s, 3H), 2.37 (dd,  $J = 9.0, 3.0$  Hz, 1H), 2.01-1.93 (m, 2H), 1.79-1.71 (m, 3H), 1.70-1.64 (m, 1H), 1.34-1.22 (m, 2H), 1.21-1.12 (m, 1H), 1.10-1.00 (m, 1H), 0.98-0.88 (m, 1H);  $^{13}\text{C}$  NMR (125 MHz,  $\text{CD}_3\text{CN}$ )  $\delta$  175.7, 160.3, 150.9, 136.7, 130.2 (q,  $J = 31.5$ ), 129.9, 128.1, 126.6 (q,  $J = 3.8$  Hz), 126.0 (q,  $J = 269.8$  Hz), 115.5, 72.5, 56.5, 54.4, 39.7, 38.0, 33.2, 31.7, 27.7, 27.5, 27.5; HRMS (ESI) calculated for  $\text{C}_{24}\text{H}_{29}\text{NO}_3\text{F}_3$   $[\text{M}+\text{H}]^+$  436.2100, found 436.2108.

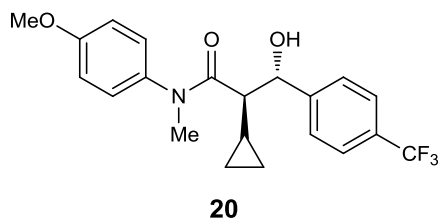

**(2RS,3SR)-2-cyclopropyl-3-hydroxy-N-(4-methoxyphenyl)-N-methyl-3-(4-(trifluoromethyl)phenyl)propanamide (anti-20).** Following the standard procedure for three-component condensations, the reaction of siloxy alkyne **28** (178.8 mg, 0.750 mmol) afforded **anti-20** (175.5 mg, 0.433 mmol, 87% yield) as a white solid after purification by flash chromatography (hexanes to 4:1 hexanes:EtOAc).  $^1\text{H}$  NMR (500 MHz,  $\text{CD}_3\text{CN}$ , 330 K)  $\delta$  7.64 (d,  $J = 8.0$  Hz, 2H), 7.37 (d,  $J = 8.0$  Hz, 2H), 6.81 (d,  $J = 9.0$  Hz, 2H), 6.67-6.51 (m, 2H), 5.02 (d,  $J = 7.0$  Hz, 1H), 4.88-4.84 (m, 1H), 3.79 (s, 3H), 3.10 (s, 3H), 1.94-1.89 (m, 1H), 1.18-1.11 (m, 1H), 0.47-0.41 (m, 1H), 0.38-0.31 (m, 1H), 0.08-0.02 (m, 1H), -0.18- -0.24 (m, 1H);  $^{13}\text{C}$  NMR (125 MHz,  $\text{CD}_3\text{CN}$ )  $\delta$  175.4, 160.3, 150.4, 137.2, 130.2 (q,  $J = 31.8$  Hz), 130.1, 128.2, 126.4, (q,  $J = 31.8$

Hz), 126.0 (q,  $J = 269.6$  Hz), 115.7, 76.8, 56.5, 53.4, 37.9, 13.4, 5.0, 4.6; HRMS (ESI) calculated for  $C_{21}H_{23}NO_3F_3$   $[M+H]^+$  394.1630, found 394.1633.

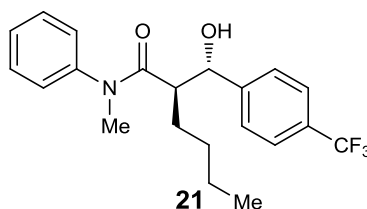

**(*RS*)-2-((*SR*)-hydroxy(4-(trifluoromethyl)phenyl)methyl)-*N*-methyl-*N*-phenylhexanamide (*anti*-21).** Following the standard procedure for three-component condensations, the reaction of *N*-methylaniline (54.2  $\mu$ L, 0.500 mmol) afforded *anti*-21 (144.0 mg, 0.379 mmol, 76% yield) as a white solid after purification by flash chromatography (hexanes to 9:1 hexanes:EtOAc).  $^1H$  NMR (500 MHz,  $CD_3CN$ , 315 K)  $\delta$  7.64 (d,  $J = 8.0$  Hz, 2H), 7.35-7.30 (m, 5H), 6.83-6.70 (m, 2H), 4.97 (d,  $J = 7.0$  Hz, 1H), 4.73-4.69 (m, 1H), 3.11 (s, 3H), 2.61 (ddd,  $J = 8.0, 5.5, 5.0$  Hz, 1H), 1.74-1.65 (m, 1H), 1.48-1.40 (m, 1H), 1.23-1.08 (m, 4H), 0.81 (t,  $J = 7.0$  Hz, 3H);  $^{13}C$  NMR (125 MHz,  $CD_3CN$ )  $\delta$  175.7, 150.4, 144.7, 130.8, 130.2 (q, 31.8 Hz), 129.2, 129.0, 128.2, 126.5 (q,  $J = 3.8$  Hz), 125.9 (q,  $J = 269.8$  Hz), 75.7, 49.1, 37.8, 31.5, 30.4, 23.7, 14.5; HRMS (ESI) calculated for  $C_{21}H_{25}NO_2F_3$   $[M+H]^+$  380.1837, found 380.1836.

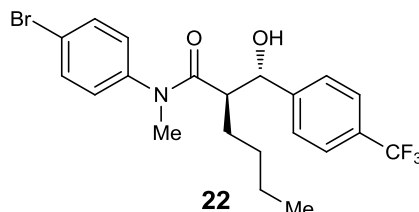

**(*RS*)-*N*-(4-bromophenyl)-2-((*SR*)-hydroxy(4-(trifluoromethyl)phenyl)methyl)-*N*-methylhexanamide (*anti*-22).** Following the standard procedure for three-component condensations, the reaction of 4-bromo-*N*-methylaniline (62.8  $\mu$ L, 0.500 mmol) afforded *anti*-22 (170.0 mg, 0.371 mmol, 74% yield) as a white solid after purification by flash chromatography (hexanes to 85:15 hexanes:EtOAc).  $^1H$  NMR (500 MHz,  $CD_3CN$ , 315 K)  $\delta$  7.64 (d,  $J = 8.0$  Hz, 2H), 7.50 (d,  $J = 8.5$  Hz, 2H), 7.34 (d,  $J = 8.0$  Hz, 2H), 6.76 (d,  $J = 6.0$  Hz, 2H), 4.75-4.68 (m, 2H), 3.11 (s, 3H), 2.64-2.58 (m, 1H), 1.71-1.61 (m, 1H), 1.38-1.28 (m, 1H), 1.21-1.05 (m, 4H), 0.80 (t,  $J = 7.0$  Hz, 3H);  $^{13}C$  NMR (125 MHz,  $CD_3CN$ )  $\delta$  175.4, 150.1, 144.0, 133.8, 131.1, 130.2 (q,  $J = 31.8$  Hz), 128.3, 126.5 (q,  $J = 3.8$  Hz), 125.9 (q,  $J = 269.6$  Hz), 122.3, 75.9, 49.4, 37.7, 31.4, 30.3, 23.7, 14.5; HRMS (ESI) calculated for  $C_{21}H_{24}NO_2BrF_3$   $[M+H]^+$  458.0943, found 458.0953.

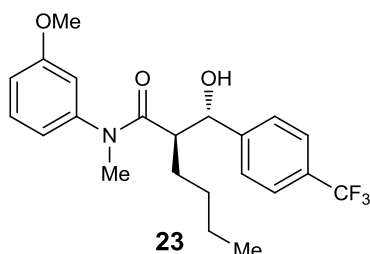

**(*RS*)-2-((*SR*)-hydroxy(4-(trifluoromethyl)phenyl)methyl)-*N*-(3-methoxyphenyl)-*N*-methylhexanamide (*anti*-23).** Following the standard procedure for three-component condensations, the reaction of 3-methoxy-*N*-methylaniline (65.4  $\mu$ L, 0.500 mmol) afforded *anti*-**23** (139.0 mg, 0.340 mmol, 68% yield) as a white solid after purification by flash chromatography (hexanes to 85:15 hexanes:EtOAc).  $^1\text{H}$  NMR (500 MHz,  $\text{CD}_3\text{CN}$ , 330 K)  $\delta$  7.64 (d,  $J = 8.0$  Hz, 2H), 7.35 (d,  $J = 7.5$  Hz, 2H), 7.23 (t,  $J = 8.0$  Hz, 1H), 6.89 (d,  $J = 8.0$  Hz, 1H), 6.41-6.31 (m, 2H), 4.94 (d,  $J = 7.5$  Hz, 1H), 4.74-4.70 (m, 1H), 3.75 (s, 3H), 3.11 (s, 3H), 2.70-2.63 (m, 1H), 1.74-1.65 (m, 1H), 1.52-1.44 (m, 1H), 1.23-1.09 (m, 4H), 0.82 (t,  $J = 7.0$  Hz, 3H);  $^{13}\text{C}$  NMR (125 MHz,  $\text{CD}_3\text{CN}$ )  $\delta$  175.6, 161.7, 150.3, 145.8, 131.5, 130.1 (q,  $J = 31.6$  Hz), 128.1, 126.5 (q,  $J = 3.8$  Hz), 125.9 (q,  $J = 269.3$  Hz), 121.0, 114.8, 114.7, 75.7, 56.5, 49.1, 37.7, 31.5, 30.5, 23.7, 14.5; HRMS (ESI) calculated for  $\text{C}_{22}\text{H}_{27}\text{NO}_3\text{F}_3$   $[\text{M}+\text{H}]^+$  410.1943, found 410.1946.

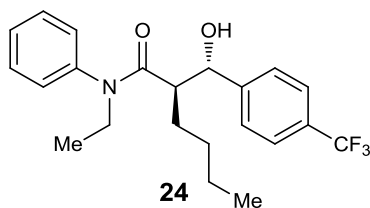

**(*RS*)-*N*-ethyl-2-((*SR*)-hydroxy(4-(trifluoromethyl)phenyl)methyl)-*N*-phenylhexanamide (*anti*-24).** Following the standard procedure for three-component condensations, the reaction of *N*-ethylaniline (62.9  $\mu$ L, 0.500 mmol) afforded *anti*-**24** (153.7 mg, 0.391 mmol, 78% yield) as a white solid after purification by flash chromatography (hexanes to 9:1 hexanes:EtOAc).  $^1\text{H}$  NMR (500 MHz,  $\text{CD}_3\text{CN}$ , 330 K)  $\delta$  7.65 (d,  $J = 8.0$  Hz, 2H), 7.35-7.28 (m, 5H), 6.75-6.50 (m, 2H), 5.09 (d,  $J = 8.0$  Hz, 1H), 4.71 (dd,  $J = 7.5, 4.5$  Hz, 1H), 3.69 (dq,  $J = 14.0, 7.0$  Hz, 1H), 3.53 (dq,  $J = 14.0, 7.0$  Hz, 1H), 2.51-2.46 (m, 1H), 1.76-1.67 (m, 1H), 1.58-1.49 (m, 1H), 1.25-1.10 (m, 4H), 0.98 (t,  $J = 7.5$  Hz, 3H), 0.83 (t,  $J = 7.0$  Hz, 3H);  $^{13}\text{C}$  NMR (125 MHz,  $\text{CD}_3\text{CN}$ )  $\delta$  175.2, 150.5, 142.8, 130.7, 130.2 (q,  $J = 31.6$  Hz), 130.0, 129.4, 128.2, 126.4 (q,  $J = 3.8$  Hz), 125.9 (q,  $J = 269.4$  Hz), 75.6, 49.1, 45.2, 31.6, 30.4, 23.7, 14.5, 13.5; HRMS (ESI) calculated for  $\text{C}_{22}\text{H}_{27}\text{NO}_2\text{F}_3$   $[\text{M}+\text{H}]^+$  394.1994, found 394.1996.

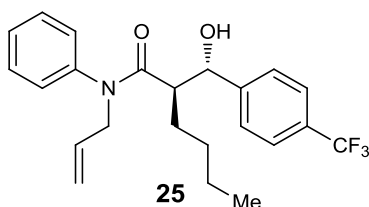

**(*RS*)-*N*-allyl-2-((*SR*)-hydroxy(4-(trifluoromethyl)phenyl)methyl)-*N*-phenylhexanamide (*anti*-25).** Following the standard procedure for three-component condensations, the reaction of *N*-allylaniline (67.8  $\mu$ L, 0.500 mmol) afforded *anti*-25 (115.1 mg, 0.284 mmol, 57% yield) as a white solid after purification by flash chromatography (hexanes to 9:1 hexanes:EtOAc).  $^1\text{H}$  NMR (500 MHz,  $\text{CD}_3\text{CN}$ , 330 K)  $\delta$  7.65 (d,  $J = 8.0$  Hz, 2H), 7.37-7.29 (m, 5H), 6.73 (m, 2H), 5.74 (ddt,  $J = 12.0, 10.5, 6.0$  Hz, 1H), 5.03 (d,  $J = 10.0$  Hz, 1H), 4.98 (dd,  $J = 17.0, 1.5$  Hz, 1H), 4.91 (d,  $J = 7.5$  Hz, 1H), 4.76-4.71 (m, 1H), 4.29 (dd,  $J = 15.0, 6.0$  Hz, 1H), 4.11 (dd,  $J = 15.0, 6.0$  Hz, 1H), 2.60-2.54 (m, 1H), 1.76-1.67 (m, 1H), 1.54-1.45 (m, 1H), 1.25-1.10 (m, 4H), 0.82 (t,  $J = 7.0$  Hz, 3H);  $^{13}\text{C}$  NMR (125 MHz,  $\text{CD}_3\text{CN}$ )  $\delta$  175.5, 150.3, 143.0, 134.6, 130.6, 130.2 (q,  $J = 31.6$  Hz), 130.1, 129.3, 128.3, 126.5 (q,  $J = 3.8$  Hz), 125.9 (q,  $J = 268.8$  Hz), 118.4, 75.6, 53.0, 49.3, 31.5, 30.4, 23.6, 14.5; HRMS (ESI) calculated for  $\text{C}_{23}\text{H}_{27}\text{NO}_2\text{F}_3$   $[\text{M}+\text{H}]^+$  406.1994, found 406.1998.

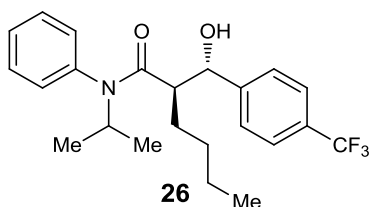

**(*RS*)-2-((*SR*)-hydroxy(4-(trifluoromethyl)phenyl)methyl)-*N*-isopropyl-*N*-phenylhexanamide (*anti*-26).** Following the standard procedure for three-component condensations, the reaction of *N*-isopropylaniline (72.4  $\mu$ L, 0.500 mmol) afforded *anti*-26 (106.1 mg, 0.260 mmol, 52% yield) as a white solid after purification by flash chromatography (hexanes to 9:1 hexanes:EtOAc).  $^1\text{H}$  NMR (500 MHz,  $\text{CD}_3\text{CN}$ , 330 K)  $\delta$  7.66 (d,  $J = 8.0$  Hz, 2H), 7.41-7.35 (m, 2H), 7.33 (d,  $J = 8.0$  Hz, 2H), 7.24-7.15 (m, 1H), 7.13-7.05 (m, 1H), 5.99-5.91 (m, 1H), 5.25 (d,  $J = 8.0$  Hz, 1H), 4.87-4.77 (m, 1H), 4.68 (dd,  $J = 7.0, 4.0$  Hz, 1H), 2.31-2.28 (m, 1H), 1.76-1.67 (m, 1H), 1.63-1.55 (m, 1H), 1.26-1.12 (m, 4H), 0.96 (t,  $J = 6.5$  Hz, 3H), 0.88-0.81 (m, 6H);  $^{13}\text{C}$  NMR (125 MHz,  $\text{CD}_3\text{CN}$ )  $\delta$  175.3, 150.6, 138.8, 131.8, 131.7, 130.2, 130.2, 130.1 (q,  $J = 31.9$  Hz), 129.7, 128.2, 126.4 (q,  $J = 3.8$  Hz), 125.9 (q,  $J = 270.0$  Hz), 75.3, 49.7, 47.2, 31.6, 30.4, 23.7, 21.5, 21.3, 14.5; HRMS (ESI) calculated for  $\text{C}_{23}\text{H}_{29}\text{NO}_2\text{F}_3$   $[\text{M}+\text{H}]^+$  408.2150, found 408.2154.

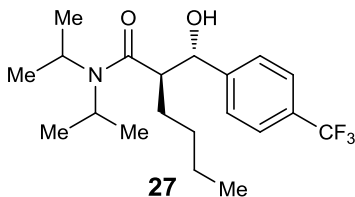

**(*RS*)-2-((*SR*)-hydroxy(4-(trifluoromethyl)phenyl)methyl)-*N,N*-diisopropylhexanamide (*anti*-27).** Following the standard procedure for three-component condensations, the reaction of

diisopropylamine (35.1  $\mu$ L, 0.250 mmol) afforded **anti-27** (28.3 mg, 0.076 mmol, 30% yield) as a white solid after purification by flash chromatography (hexanes to 12:1 hexanes:EtOAc).  $^1\text{H}$  NMR (500 MHz,  $\text{CD}_3\text{CN}$ , 330 K)  $\delta$  7.63 (d,  $J$  = 8.5 Hz, 2H), 7.51 (d,  $J$  = 8.0 Hz, 2H), 5.76 (d,  $J$  = 8.5 Hz, 1H), 4.82 (dd,  $J$  = 8.0, 3.0 Hz, 1H), 3.87-3.78 (m, 1H), 3.34-3.20 (m, 1H), 3.05 (ddd,  $J$  = 9.0, 6.0, 3.5 Hz, 1H), 1.92-1.82 (m, 1H), 1.76-1.67 (m, 1H), 1.41-1.30 (m, 4H), 1.29 (d,  $J$  = 7.0 Hz, 3H), 1.14 (d,  $J$  = 7.0 Hz, 3H), 1.04 (d,  $J$  = 7.0 Hz, 3H), 0.82 (t,  $J$  = 7.5 Hz, 3H), 0.51 (d,  $J$  = 7.0 Hz, 3H);  $^{13}\text{C}$  NMR (125 MHz,  $\text{CD}_3\text{CN}$ )  $\delta$  176.0, 151.0, 129.8 (q,  $J$  = 31.3 Hz), 128.0, 126.2 (q,  $J$  = 3.8 Hz), 126.0 (q,  $J$  = 269.5 Hz), 75.8, 50.3, 48.1, 47.3, 32.5, 30.8, 24.0, 21.3, 21.2, 21.0, 20.6, 14.7; HRMS (ESI) calculated for  $\text{C}_{20}\text{H}_{31}\text{NO}_2\text{F}_3$   $[\text{M}+\text{H}]^+$  374.2307, found 374.2306.

### 3. New Phosphine-Catalyzed Reactions

#### Procedure for Acylation of Amines.

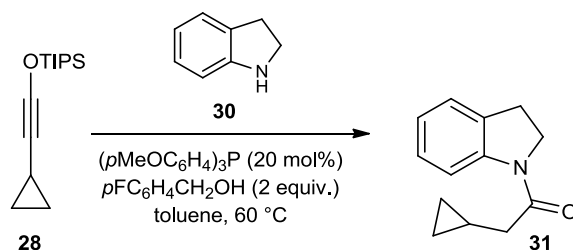

To a solution of tris(4-methoxyphenyl)phosphine (17.6 mg, 0.050 mmol), siloxy alkyne **28** (89.4 mg, 0.375 mmol), and indoline **30** (29.8  $\mu$ L, 0.250 mmol) in toluene (0.50 mL) was added 4-fluorobenzyl alcohol (54.6  $\mu$ L, 0.50 mmol). The reaction was heated to 60  $^\circ\text{C}$  in an oil bath and was allowed to proceed for 48 hours. The reaction mixture was cooled to room temperature, and was concentrated by rotary evaporation. The crude residue was loaded directly onto a silica column and purified by flash chromatography (97.5:2.5 hexanes:EtOAc) affording amide **31** (47.7mg, 0.237 mmol, 95% yield) as a white solid.

**2-cyclopropyl-1-(indolin-1-yl)ethanone (31)**.  $^1\text{H}$  NMR (500 MHz,  $\text{CDCl}_3$ , 293 K)  $\delta$  8.27 (d,  $J$  = 8.0 Hz, 1H), 7.21-7.14 (m, 2H), 7.02-6.96 (m, 1H), 4.01 (t,  $J$  = 8.5 Hz, 2H), 3.18 (t,  $J$  = 8.5 Hz, 2H), 2.37 (d,  $J$  = 7.0 Hz, 2H), 1.22-1.12 (m, 1H), 0.64-0.59 (m, 2H), 0.25-0.17 (m, 2H);  $^{13}\text{C}$  NMR (125 MHz,  $\text{CDCl}_3$ ) 171.2, 143.3, 131.2, 127.8, 124.7, 123.7, 117.3, 48.1, 41.4, 28.3, 6.8, 4.7; HRMS (ESI) calculated for  $\text{C}_{13}\text{H}_{16}\text{NO}$   $[\text{M}+\text{H}]^+$  202.1232, found 202.1233.

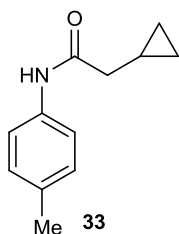

**2-cyclopropyl-N-(p-tolyl)acetamide (33)**. Following the general procedure for acylation of amines, the reaction of *p*-toluidine **32** (27.5  $\mu$ L, 0.250 mmol) afforded amide **33** (45.5 mg, 0.240

mmol, 96% yield) as a white solid  $^1\text{H}$  NMR (500 MHz,  $\text{CDCl}_3$ , 293 K)  $\delta$  7.70 (br s, 1H), 7.42 (d,  $J = 8.0$  Hz, 2H), 7.12 (d,  $J = 8.0$  Hz, 2H), 2.35-2.29 (m, 5H), 1.12-1.02 (m, 1H), 0.70-0.64 (m, 2H) 0.30-0.24 (m, 2H);  $^{13}\text{C}$  NMR (125 MHz,  $\text{CDCl}_3$ ) 170.8, 135.5, 134.0, 129.6, 120.2, 42.5, 21.0, 7.4, 4.9; HRMS (ESI) calculated for  $\text{C}_{12}\text{H}_{16}\text{NO}$   $[\text{M}+\text{H}]^+$  190.1232, found 190.1234.

### Procedure for the Acylation of 2,6-Diisopropylphenol.

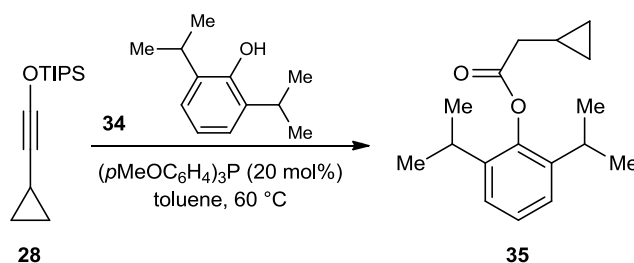

**2,6-diisopropylphenyl 2-cyclopropylacetate (35)**. To a solution of tris(4-methoxyphenyl)-phosphine (17.6 mg, 0.050 mmol) and siloxy alkyne **28** (59.6 mg, 0.25 mmol) in toluene (0.50 mL) was added 2,6-diisopropylphenol (92.7  $\mu\text{L}$ , 0.500 mmol). The reaction was heated to 60 °C in an oil bath and was allowed to proceed for 48 hours. The reaction mixture was cooled to room temperature, and was concentrated by rotary evaporation. The crude residue was loaded directly onto a silica column and purified by flash chromatography (200:1 hexanes:EtOAc) affording **35** as a clear oil (55.0 mg, 0.211 mmol, 85 % Yield).  $^1\text{H}$  NMR (500 MHz,  $\text{CDCl}_3$ , 293 K)  $\delta$  7.23-7.20 (m, 1H), 7.17-7.15 (m, 2H), 2.96 (septet,  $J = 7.0$  Hz, 2H), 2.50 (d,  $J = 7.0$  Hz, 2H), 1.29-1.24 (m, 1H), 1.21 (d,  $J = 7.0$  Hz, 12H), 0.67-0.62 (m, 2H), 0.33-0.29 (m, 2H);  $^{13}\text{C}$  NMR (125 MHz,  $\text{CDCl}_3$ ) 172.0, 145.9, 140.5, 126.6, 124.1, 39.8, 27.7, 23.9, 23.0, 7.5, 4.8; HRMS (ESI) calculated for  $\text{C}_{17}\text{H}_{24}\text{O}_2\text{Na}$   $[\text{M}+\text{Na}]^+$  283.1674, found 283.1669.

### Procedure for the Acylation of Diethyl Malonate.

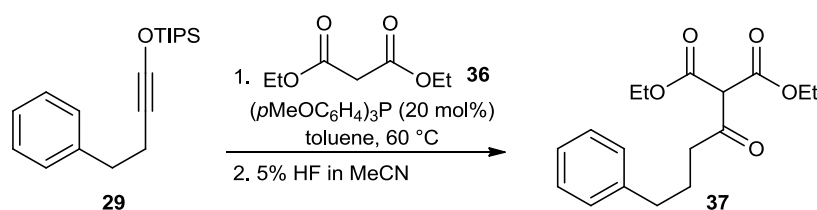

**Diethyl 2-(4-phenylbutanoyl)malonate (37)**. Diethyl malonate (151.8  $\mu\text{L}$ , 1.0 mmol) was added to a solution of tris(4-methoxyphenyl)phosphine (35.4 mg, 0.100 mmol) and siloxy alkyne **29** (151.3 mg, 0.3500 mmol) in toluene (0.50 mL). The reaction was heated to 60 °C in an oil bath and was allowed to proceed for 48 h. The reaction mixture was then cooled to room temperature and was treated with HF (500  $\mu\text{L}$ , 5% aq., prepared by dilution of Fisher 49% aq. HF with  $\text{CH}_3\text{CN}$ ). The reaction was allowed to proceed for an additional 2 h, the mixture was diluted with  $\text{CH}_2\text{Cl}_2$  (5 mL) and washed with saturated aqueous  $\text{NaHCO}_3$  (5 mL). The aqueous layer was extracted with  $\text{CH}_2\text{Cl}_2$  (3 x 5 mL), the combined organic layers were dried with anhydrous  $\text{Na}_2\text{SO}_4$ , filtered, and concentrated via rotary evaporation. The crude mixture was purified by flash chromatography (hexanes to 97:3 hexanes:EtOAc) affording **37** as a clear oil (114.5 mg,



0.374 mmol, 75% yield) as a 1.5:1 mixture of enol and keto tautomers.  $^1\text{H}$  NMR (500 MHz,  $\text{CDCl}_3$ , 293 K)  $\delta$  13.44, 4.33 (s, s, total 1H), 7.30-7.25 (m, 2H), 7.21-7.15 (m, 3H), 4.29-4.16 (m, 4H), 2.69-2.61 (m, 3H), 2.50-2.45 (m, 1H), 2.01-1.92 (m, 2H), 1.33-1.24 (m, 6H);  $^{13}\text{C}$  NMR (125 MHz,  $\text{CDCl}_3$ ) 198.9, 182.8, 171.4, 166.3, 164.8, 141.7, 141.6, 128.7, 128.6, 128.6, 126.2, 126.2, 100.1, 65.6, 62.5, 61.6, 61.2, 41.4, 35.6, 34.9, 33.6, 28.5, 25.1, 14.3, 14.3, 14.2; HRMS (ESI) calculated for  $\text{C}_{17}\text{H}_{23}\text{O}_5$   $[\text{M}+\text{H}]^+$  307.1545, found 307.1543.

## 4. Library Synthesis and Characterization

### General Procedure for the Synthesis of Library Compounds

A flame-dried test tube equipped with a stirbar was charged with 0.3 mmol of the requisite amine, and 0.6 ml of a 0.1M solution of tris(4-methoxyphenyl)phosphine in anhydrous toluene. To the resulting suspension was added the requisite aldehyde (0.6 mmol), siloxy alkyne (0.45 mmol) and 4-fluorobenzyl alcohol (65.6  $\mu\text{L}$ , 0.6 mmol). The test tubes were sealed with septa, reactions were heated to 60  $^\circ\text{C}$  and were allowed to progress for 48 hours. The reactions were cooled to room temperature and concentrated by rotary evaporation. The resulting crude mixtures were diluted with DMSO until a final volume of 1.0 mL was reached. All library compounds were purified by preparative HPLC-MS on a Waters system composed of the following components: Waters 2545 binary gradient module, Waters 515 HPLC pump, Waters 3100 quadrupole mass spectrometer, Waters system fluidics organizer, Waters 2767 sample manager, Waters 2489 dual channel UV-Vis detector, Waters 2424 evaporative light scattering detector, and Masslynx software v4.1. Preparative HPLC conditions: Waters X-bridge Prep C18 5  $\mu\text{m}$  OBD 19 $\times$ 150 mm column, flow rate 19.0 mL/min, injection volume 1.0 mL; mobile phase A: water with 0.1% formic acid; mobile phase B: methanol with 0.1% formic acid; typical gradient: 0-1.25 min 40-63% B, 1.25-7.25 min 63-77% B, 7.25-8.25 min 77-92% B, 8.25-11.85 min 92-100% B, 11.85-12 min 100-40% B. Fractions were collected by ES+ MS detection of product ion. The purity of all library compounds was then assessed by analytic HPLC-MS. Analytical HPLC conditions: ES Industries Sonoma C18 5  $\mu\text{m}$  100  $\text{\AA}$  5 cm X 2.1 mm, flow rate 1.2 mL/min, injection volume 20  $\mu\text{L}$ ; mobile phase A: water with 0.1% formic acid; mobile phase B: methanol with 0.1% formic acid; typical gradient: 0-4.25 min 45-100% B, 4.25-5.00 min 100% B, 5.00-5.50 min 100-45% B, 5.50-6.50 min 45% B. Analytical traces for all library members are provided below. Compounds **41**, **43**, **50**, **68**, and **73** were randomly selected for further analysis by  $^1\text{H}$  and  $^{13}\text{C}$  NMR spectroscopy.

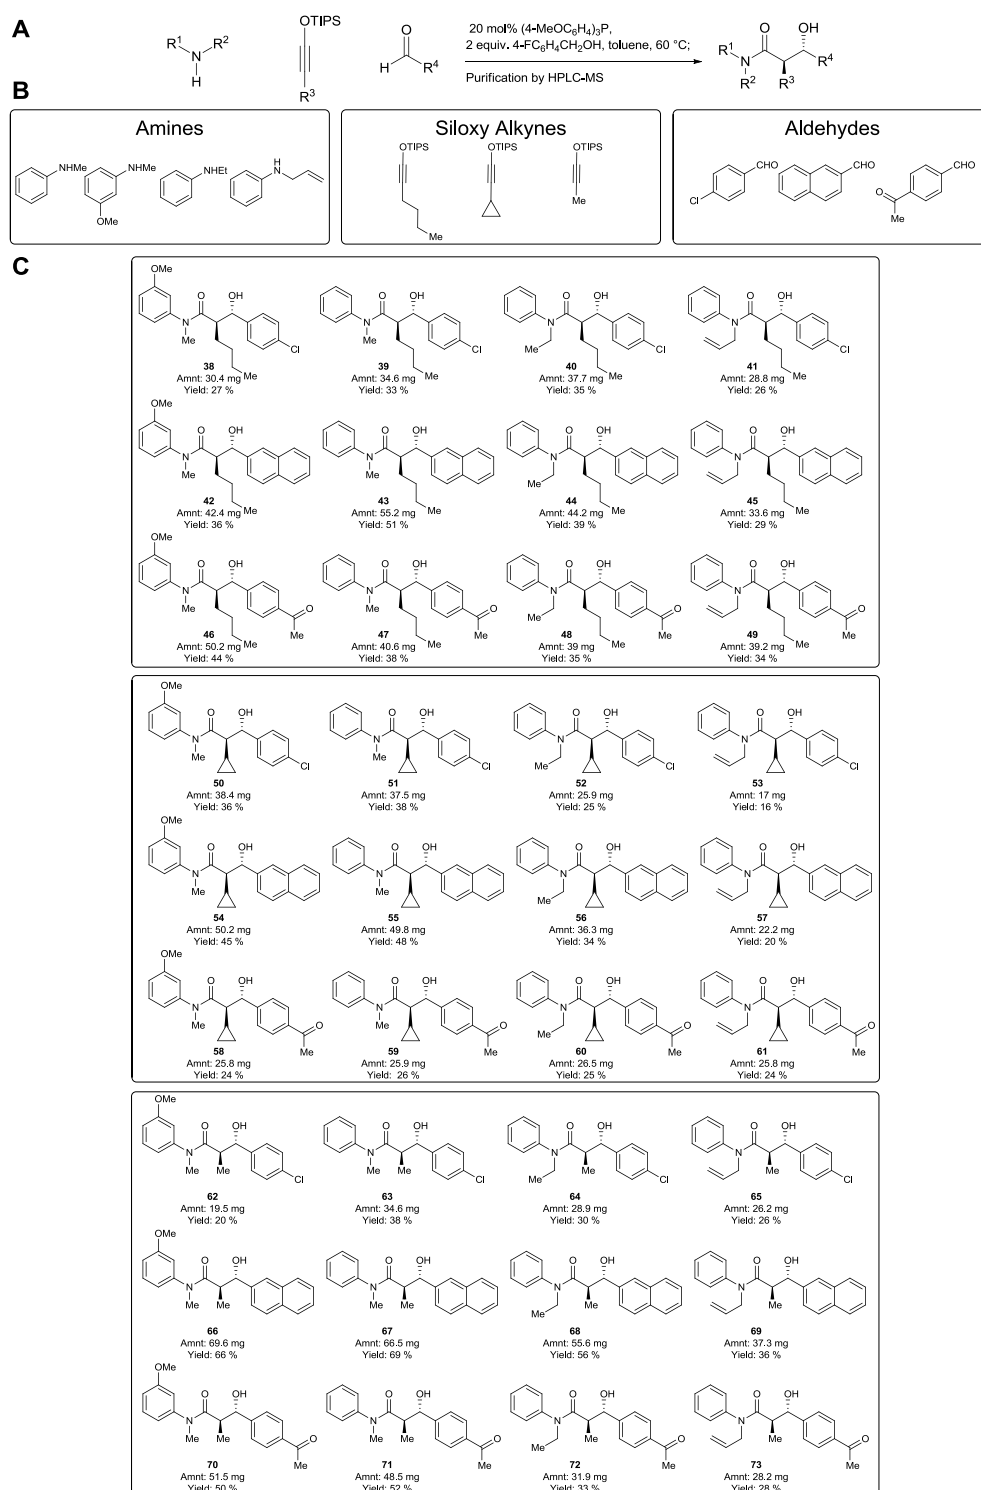

**Supplementary Figure S2. Synthesis of a 36-Member Library.** **A:** Reaction scheme and purification method. **B:** Structures of building blocks used for library construction. **C:** Structures of individual library members, as well as their isolated yields.

# Purity Reports for All Library Compounds

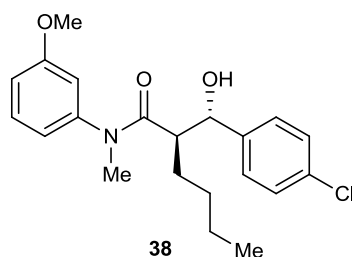

Chemical Formula: C<sub>21</sub>H<sub>26</sub>ClNO<sub>3</sub>  
Exact Mass: 375.16

Page 1

Date: 24-May-2011 File: 270 C P

Sample Report:

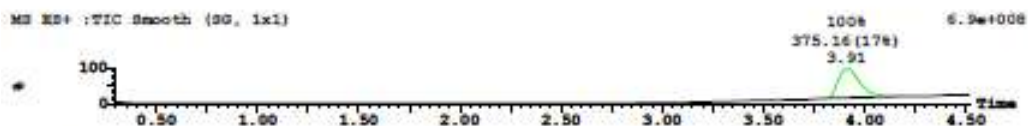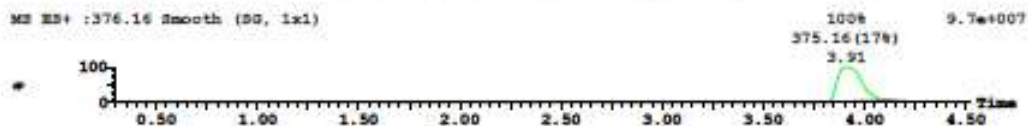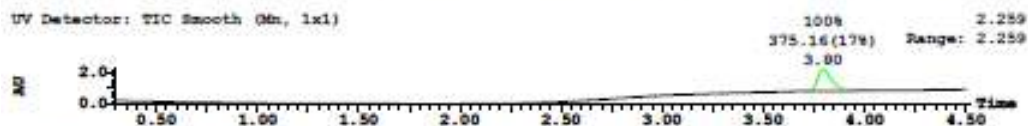

| Peak Number | Compound | Time | AreaAbc | Area%Total | Width | Height | Mass Found |
|-------------|----------|------|---------|------------|-------|--------|------------|
| 1           | Found    | 3.80 | 1e+005  | 100.00     | 0     | 1e+006 | 375.16     |

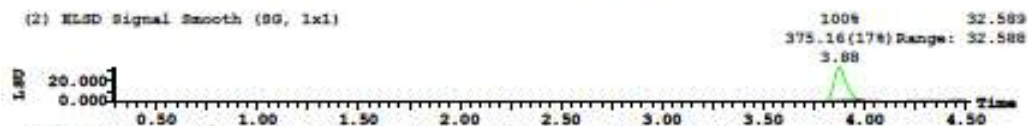

| Peak Number | Compound | Time | AreaAbc | Area%Total | Width | Height | Mass Found |
|-------------|----------|------|---------|------------|-------|--------|------------|
| 1           | Found    | 3.88 | 2e+003  | 100.00     | 0     | 3e+004 | 375.16     |

| Peak ID | Compound | Time | Mass Found |
|---------|----------|------|------------|
| 1       | Found    | 3.91 | 375.16     |

SAMPLE: 5, 1:5, A 1: (Time: 3.91) Combine (229:235-(196:198+266:268)) 1:MS ES+ 8.7e+007

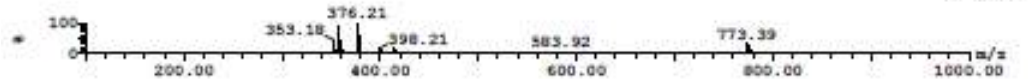

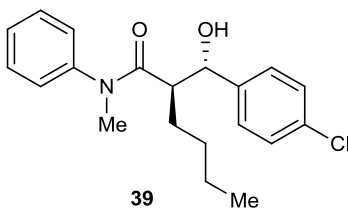

39  
 Chemical Formula: C<sub>20</sub>H<sub>24</sub>ClNO<sub>2</sub>  
 Exact Mass: 345.15

Sample Report:

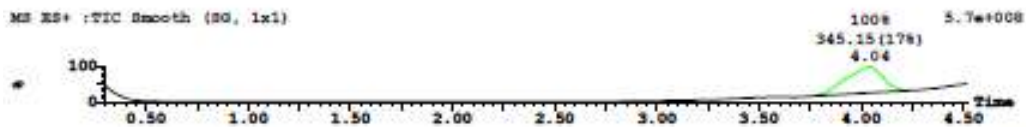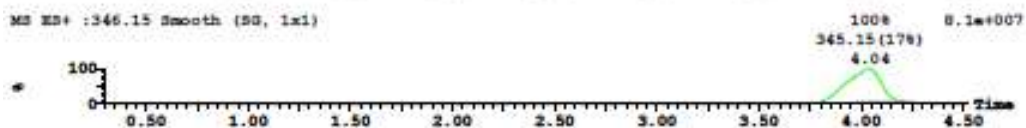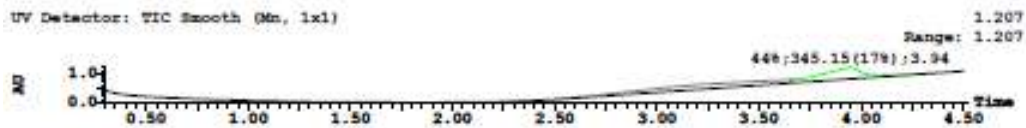

| Peak Number | Compound | Time | AreaAbs | Area %Total | Width | Height | Mass Found |
|-------------|----------|------|---------|-------------|-------|--------|------------|
| 1           |          | 3.65 | 1e+005  | 55.81       | 1     | 1e+005 |            |
| 2           | Found    | 3.94 | 1e+005  | 44.19       | 1     | 4e+005 | 345.15     |

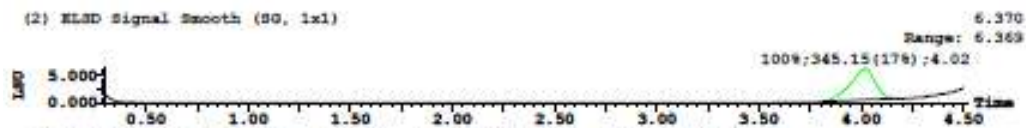

| Peak Number | Compound | Time | AreaAbs | Area %Total | Width | Height | Mass Found |
|-------------|----------|------|---------|-------------|-------|--------|------------|
| 1           | Found    | 4.02 | 8e+002  | 100.00      | 0     | 6e+003 | 345.15     |

| Peak ID | Compound | Time | Mass Found |
|---------|----------|------|------------|
| 2       | Found    | 4.04 | 345.15     |

SAMPLE: 5,1:3,A 2: (Time: 4.04) Combine (237:243-(204:206+1:-1))

1:MS ES+  
7.3e+007

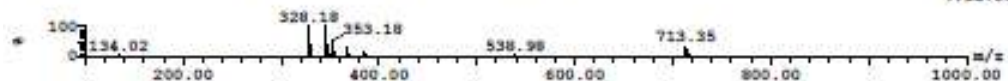

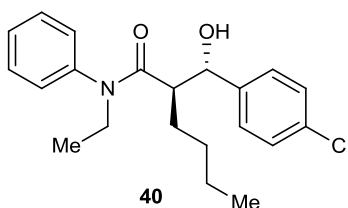

40  
 Chemical Formula: C<sub>21</sub>H<sub>26</sub>ClNO<sub>2</sub>  
 Exact Mass: 359.17

Sample Report:

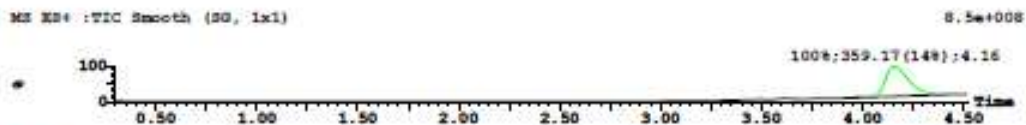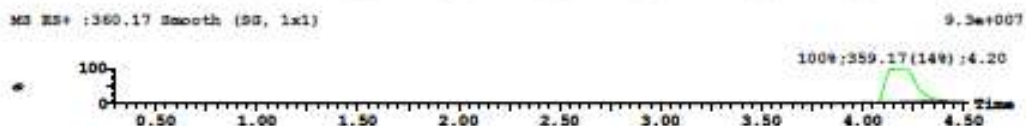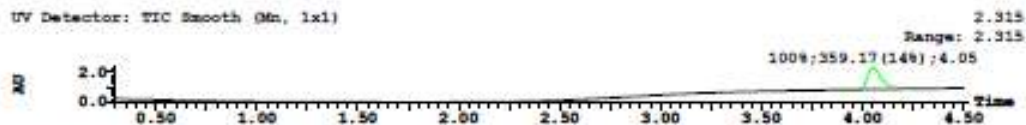

| Peak Number | Compound | Time | AreaAbs | Area %Total | Width | Height | Mass Found |
|-------------|----------|------|---------|-------------|-------|--------|------------|
| 1           | Found    | 4.05 | 1e+005  | 100.00      | 1     | 1e+005 | 359.17     |

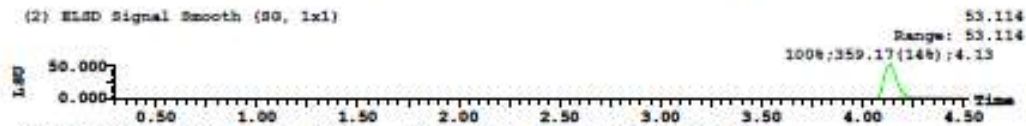

| Peak Number | Compound | Time | AreaAbs | Area %Total | Width | Height | Mass Found |
|-------------|----------|------|---------|-------------|-------|--------|------------|
| 1           | Found    | 4.13 | 4e+003  | 100.00      | 0     | 5e+004 | 359.17     |

| Peak ID | Compound | Time | Mass Found |
|---------|----------|------|------------|
| 1       | Found    | 4.16 | 359.17     |

SAMPLE: 5,1:4,A 1: (Time: 4.20) Combine (246:252-(213:215+1:-1)) 1:MS ES+ 8.5e+007

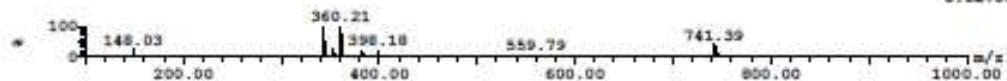

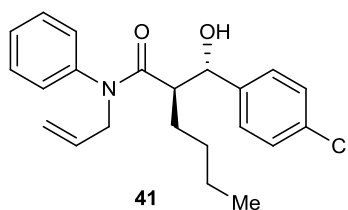

41  
 Chemical Formula: C<sub>22</sub>H<sub>26</sub>ClNO<sub>2</sub>  
 Exact Mass: 371.17

Sample Report:

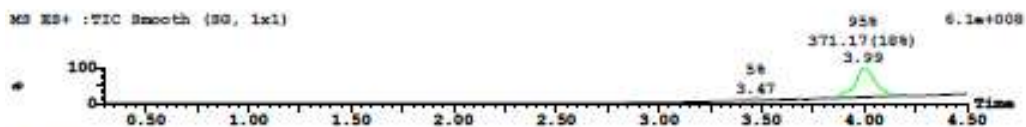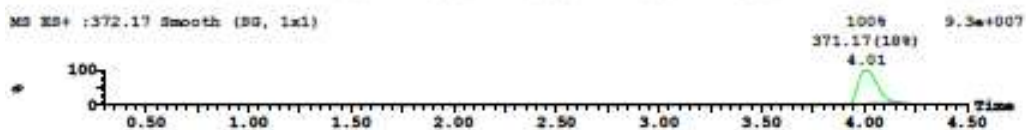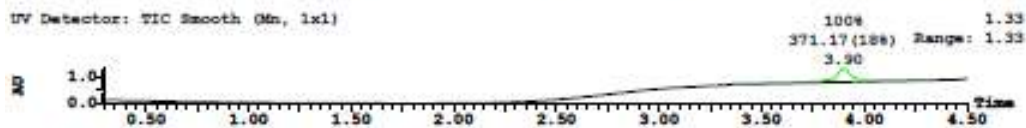

| Peak Number | Compound | Time | AreaAbs | Area %Total | Width | Height | Mass Found |
|-------------|----------|------|---------|-------------|-------|--------|------------|
| 2           | Found    | 3.90 | 6e+004  | 100.00      | 1     | 5e+005 | 371.17     |

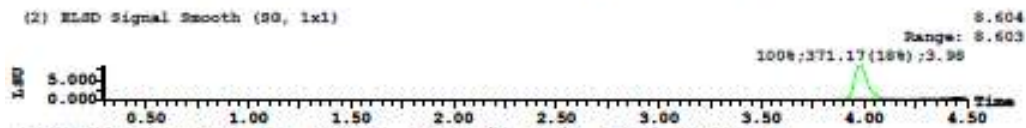

| Peak Number | Compound | Time | AreaAbs | Area %Total | Width | Height | Mass Found |
|-------------|----------|------|---------|-------------|-------|--------|------------|
| 2           | Found    | 3.98 | 7e+002  | 100.00      | 0     | 8e+003 | 371.17     |

Peak ID Compound Time Mass Found  
 2 Found 3.99 371.17  
 SAMPLE: S,1:6,A 2: (Time: 4.01) Combine (235:241-(202:204+272:274)) 1:MS ES+  
 7.4e+007

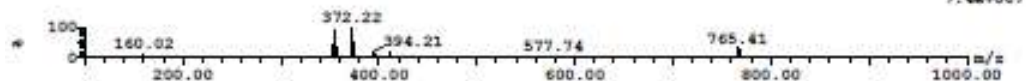

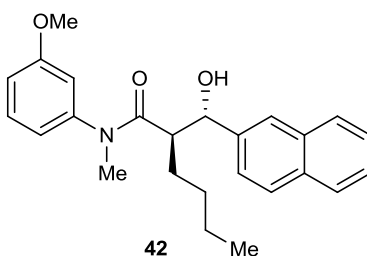

42  
 Chemical Formula: C<sub>25</sub>H<sub>29</sub>NO<sub>3</sub>  
 Exact Mass: 391.21

Sample Report:

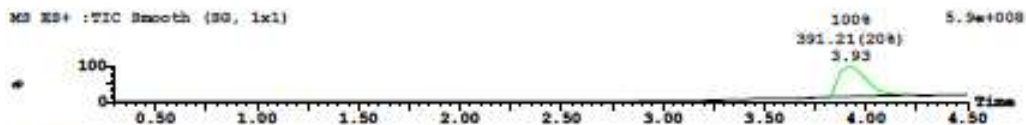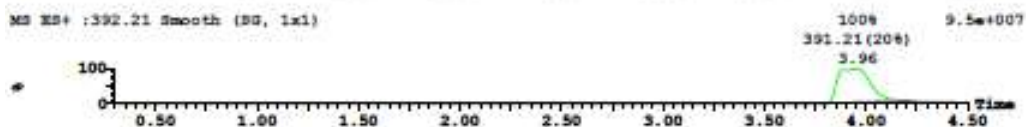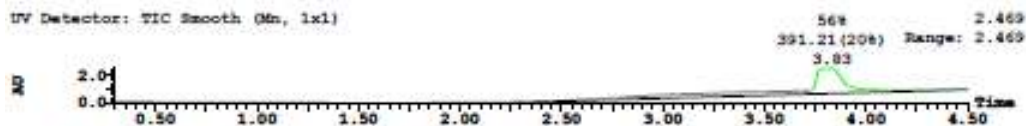

| Peak Number | Compound | Time | AreaAbs | Area %Total | Width | Height | Mass Found |
|-------------|----------|------|---------|-------------|-------|--------|------------|
| 1           |          | 3.71 | 2e+005  | 44.31       | 1     | 2e+005 |            |
| 2           | Found    | 3.83 | 3e+005  | 55.69       | 1     | 2e+005 | 391.21     |

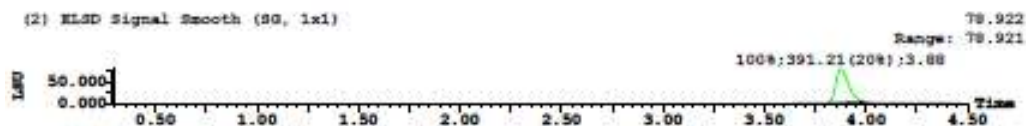

| Peak Number | Compound | Time | AreaAbs | Area %Total | Width | Height | Mass Found |
|-------------|----------|------|---------|-------------|-------|--------|------------|
| 2           | Found    | 3.88 | 6e+003  | 100.00      | 0     | 8e+004 | 391.21     |

| Peak ID | Compound | Time | Mass Found |
|---------|----------|------|------------|
| 2       | Found    | 3.93 | 391.21     |

SAMPLE: 5,1:3,B 2: (Time: 3.96) Combine (232:238-(199:201+269:271)) 1:MS MS+ 8.7e+007

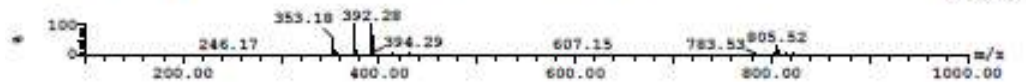

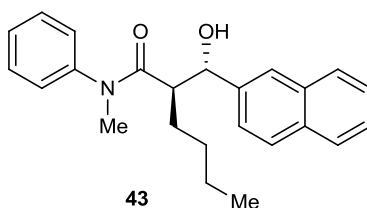

43  
 Chemical Formula: C<sub>24</sub>H<sub>27</sub>NO<sub>2</sub>  
 Exact Mass: 361.20

Sample Report:

MS ES+ : TIC Smooth (SQ, 1x1) 100% 6.3e+008  
 361.20 (18%)  
 3.91

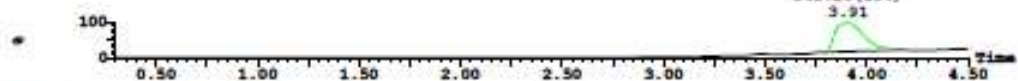

MS ES+ : 362.2 Smooth (SQ, 1x1) 100% 9.4e+007  
 361.20 (18%)  
 3.93

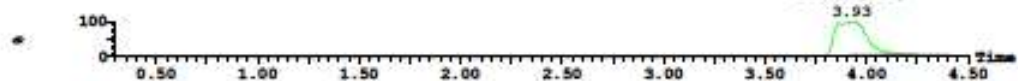

UV Detector: TIC Smooth (Mn, 1x1) 100% 2.459  
 361.20 (18%) Range: 2.459  
 3.81

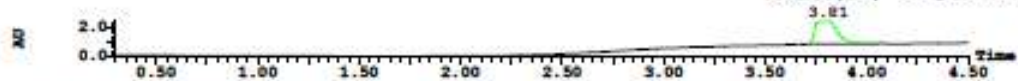

| Peak Number | Compound | Time | AreaAbs | Area %Total | Width | Height | Mass Found |
|-------------|----------|------|---------|-------------|-------|--------|------------|
| 1           | Found    | 3.81 | 2e+005  | 100.00      | 0     | 2e+005 | 361.20     |

(2) EISD Signal Smooth (SQ, 1x1) 100% 74.890  
 361.20 (18%) Range: 74.889  
 3.86

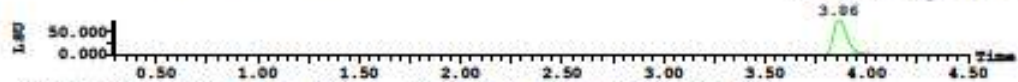

| Peak Number | Compound | Time | AreaAbs | Area %Total | Width | Height | Mass Found |
|-------------|----------|------|---------|-------------|-------|--------|------------|
| 1           | Found    | 3.86 | 6e+003  | 100.00      | 0     | 7e+004 | 361.20     |

| Peak ID | Compound | Time | Mass Found |
|---------|----------|------|------------|
| 1       | Found    | 3.91 | 361.20     |

SAMPLE: 5,1:1,B 1: (Time: 3.93) Combine (230:236--(197:199+267:269))

1:MS ES+  
 8.9e+007

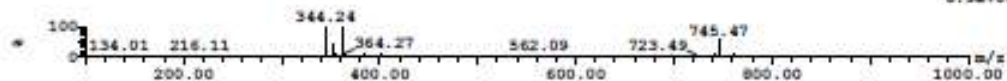



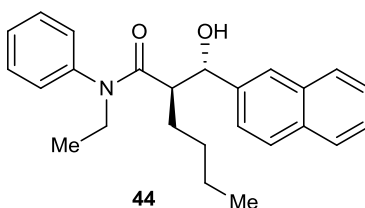

44  
 Chemical Formula: C<sub>25</sub>H<sub>29</sub>NO<sub>2</sub>  
 Exact Mass: 375.22

Sample Report:

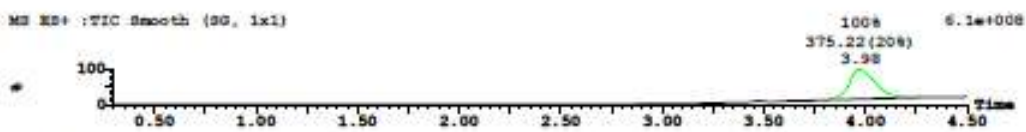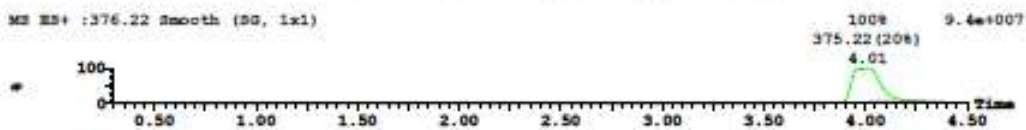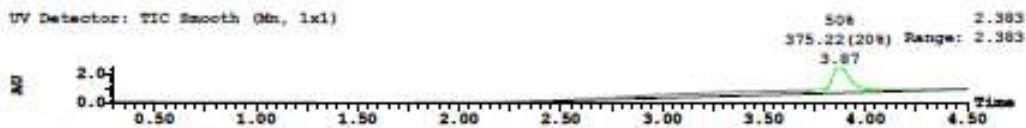

| Peak Number | Compound | Time | AreaAbs | Area %Total | Width | Height | Mass Found |
|-------------|----------|------|---------|-------------|-------|--------|------------|
| 1           |          | 3.73 | 2e+005  | 50.02       | 1     | 2e+005 |            |
| 2           | Found    | 3.87 | 2e+005  | 49.98       | 1     | 2e+006 | 375.22     |

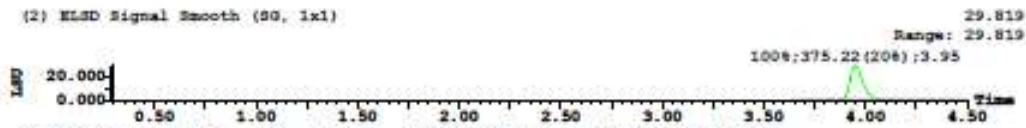

| Peak Number | Compound | Time | AreaAbs | Area %Total | Width | Height | Mass Found |
|-------------|----------|------|---------|-------------|-------|--------|------------|
| 2           | Found    | 3.95 | 2e+003  | 100.00      | 0     | 3e+004 | 375.22     |

| Peak ID | Compound | Time | Mass Found |
|---------|----------|------|------------|
| 2       | Found    | 3.98 | 375.22     |

SAMPLE: 5, 1:2, B 2: (Time: 4.01) Combine (235:241-(202:204+272:274)) 1:MS ES+ 8.9e+007

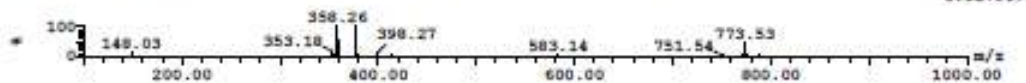

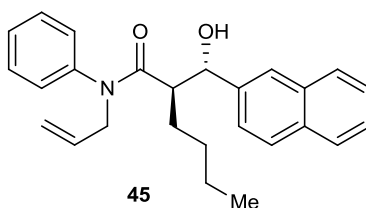

Chemical Formula: C<sub>26</sub>H<sub>29</sub>NO<sub>2</sub>  
Exact Mass: 387.22

Sample Report:

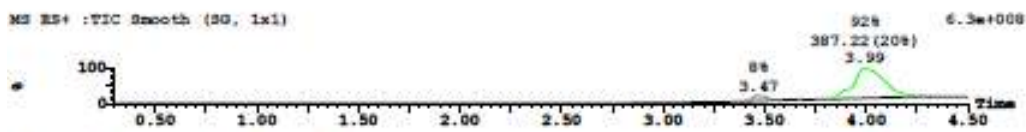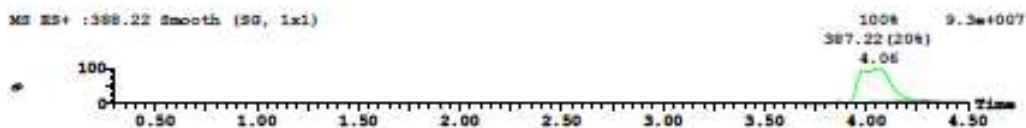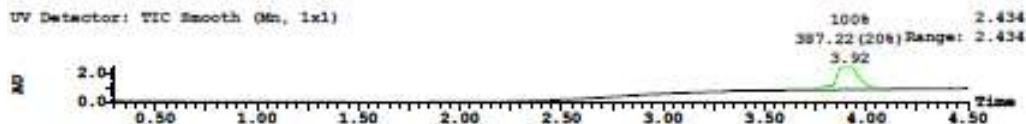

| Peak Number | Compound | Time | AreaAbs | Area%Total | Width | Height | Mass Found |
|-------------|----------|------|---------|------------|-------|--------|------------|
| 2           | Found    | 3.92 | 2e+005  | 100.00     | 1     | 2e+006 | 387.22     |

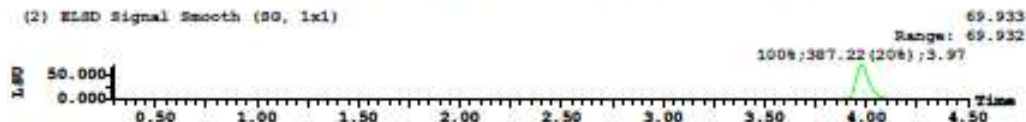

| Peak Number | Compound | Time | AreaAbs | Area%Total | Width | Height | Mass Found |
|-------------|----------|------|---------|------------|-------|--------|------------|
| 2           | Found    | 3.97 | 5e+003  | 100.00     | 0     | 7e+004 | 387.22     |

| Peak ID | Compound | Time | Mass Found |
|---------|----------|------|------------|
| 2       | Found    | 3.99 | 387.22     |

SAMPLE: 5, 1:4, D 2: (Time: 4.06) Combine (238:244-(205:207+275:277)) 1:MS ES+  
8.4e+007

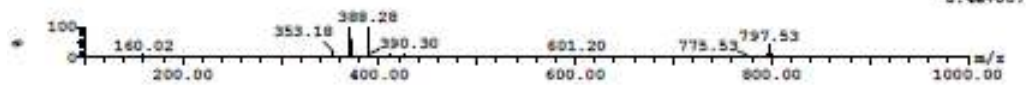

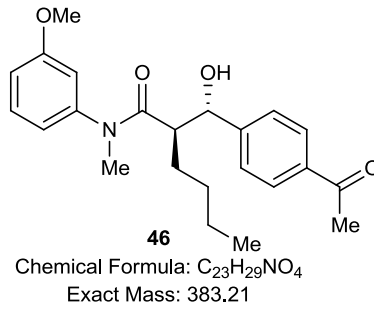

Sample Report:

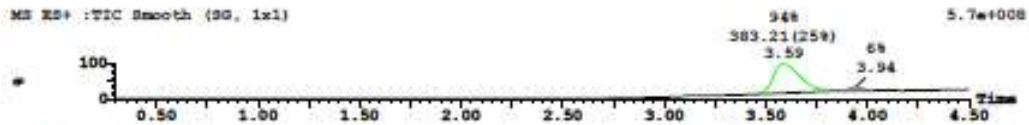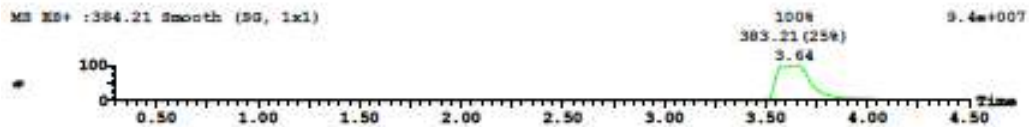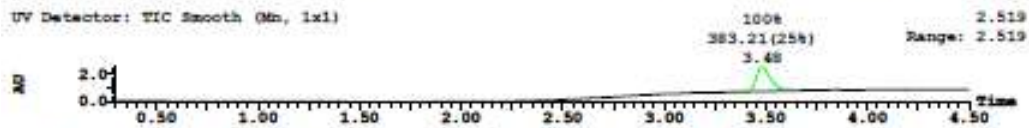

| Peak Number | Compound | Time | AreaAbs | Area%Total | Width | Height | Mass Found |
|-------------|----------|------|---------|------------|-------|--------|------------|
| 1           | Found    | 3.48 | 2e+005  | 100.00     | 1     | 2e+006 | 383.21     |

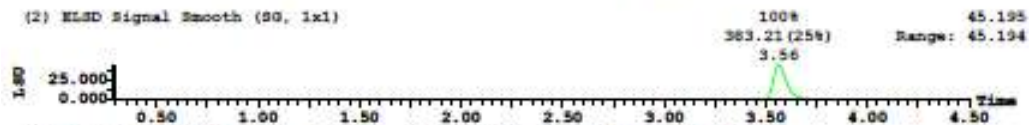

| Peak Number | Compound | Time | AreaAbs | Area%Total | Width | Height | Mass Found |
|-------------|----------|------|---------|------------|-------|--------|------------|
| 1           | Found    | 3.56 | 3e+003  | 100.00     | 0     | 5e+004 | 383.21     |

| Peak ID | Compound | Time | Mass Found |
|---------|----------|------|------------|
| 1       | Found    | 3.59 | 383.21     |

SAMPLE: 5, 1:1, C 1: (Time: 3.64) Combine (213:219-(180:182+250:252)) 1-MS ES+ 9.0e+007

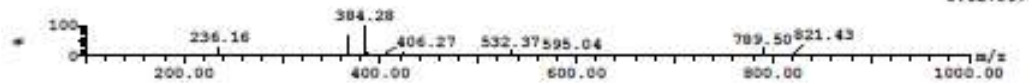

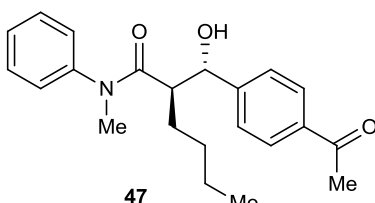

47  
 Chemical Formula: C<sub>22</sub>H<sub>27</sub>NO<sub>3</sub>  
 Exact Mass: 353.20

Sample Report:

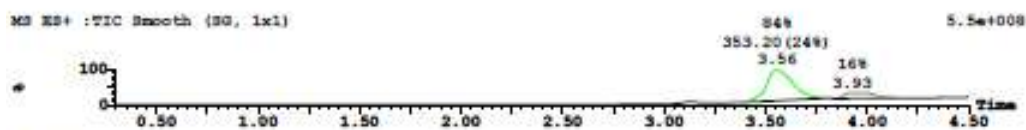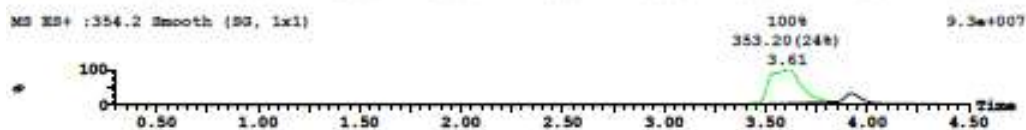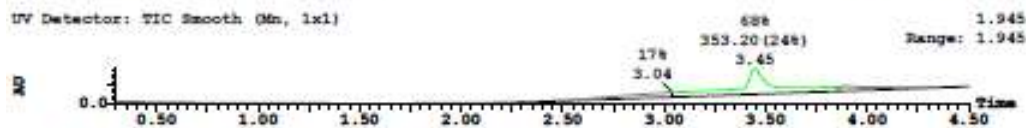

| Peak Number | Compound | Time | AreaAbs | Area %Total | Width | Height | Mass Found |
|-------------|----------|------|---------|-------------|-------|--------|------------|
| 1           |          | 3.04 | 8e+004  | 17.24       | 1     | 3e+005 |            |
| 2           | Found    | 3.45 | 3e+005  | 67.68       | 1     | 1e+006 | 353.20     |
| 3           |          | 3.90 | 7e+004  | 15.08       | 1     | 3e+005 |            |

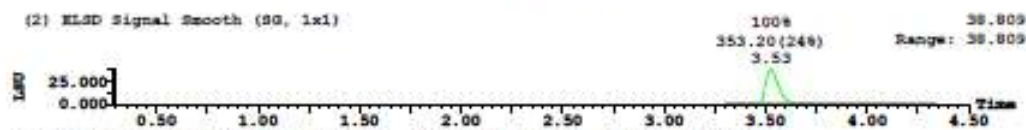

| Peak Number | Compound | Time | AreaAbs | Area %Total | Width | Height | Mass Found |
|-------------|----------|------|---------|-------------|-------|--------|------------|
| 2           | Found    | 3.53 | 3e+003  | 100.00      | 0     | 4e+004 | 353.20     |

Peak ID Compound Time Mass Found  
 2 Found 3.56 353.20  
 SAMPLE: 5,1:5,B 2: (Time: 3.61) Combine (211:217-(178:180+248:250)) 1:MS ES+ 8.5e+007

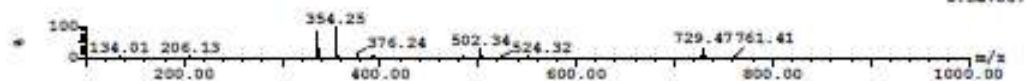

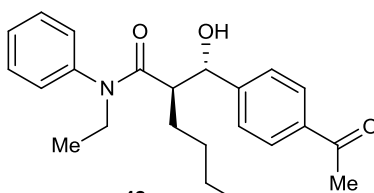

48  
 Chemical Formula: C<sub>23</sub>H<sub>29</sub>NO<sub>3</sub>  
 Exact Mass: 367.21

Sample Report:

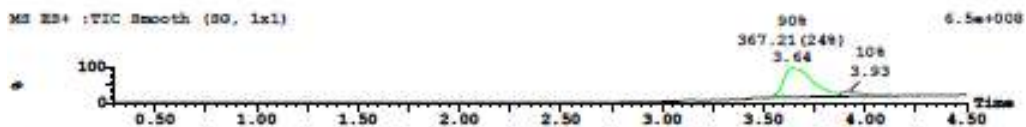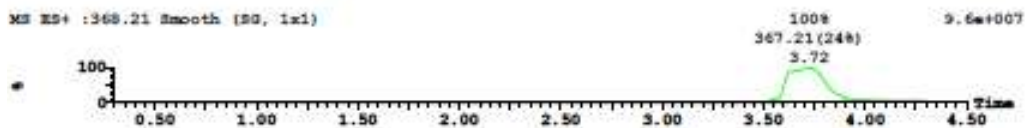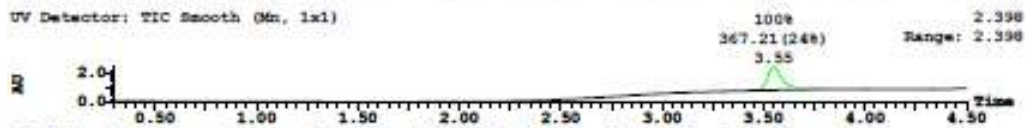

| Peak Number | Compound | Time | AreaAbc | Area%Total | Width | Height | Mass Found |
|-------------|----------|------|---------|------------|-------|--------|------------|
| 1           | Found    | 3.55 | 1e+005  | 100.00     | 0     | 2e+006 | 367.21     |

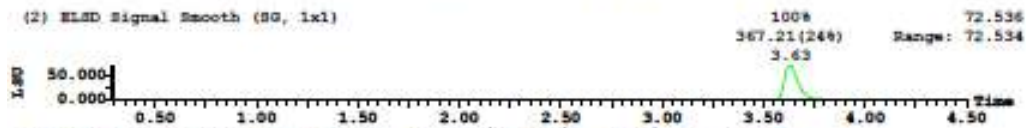

| Peak Number | Compound | Time | AreaAbc | Area%Total | Width | Height | Mass Found |
|-------------|----------|------|---------|------------|-------|--------|------------|
| 1           | Found    | 3.63 | 6e+003  | 100.00     | 0     | 7e+004 | 367.21     |

| Peak ID | Compound | Time | Mass Found |
|---------|----------|------|------------|
| 1       | Found    | 3.64 | 367.21     |

SAMPLE: 5,1:6,B 1: (Time: 3.72) Combine (218:224-(185:187+255:257)) 1:MS ES+ 8.9e+007

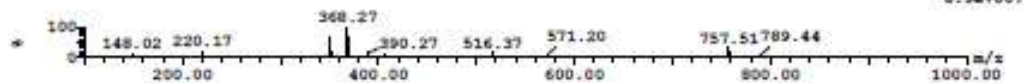

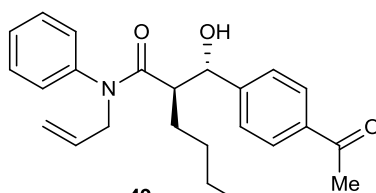

49  
 Chemical Formula: C<sub>24</sub>H<sub>29</sub>NO<sub>3</sub>  
 Exact Mass: 379.21

Sample Report:

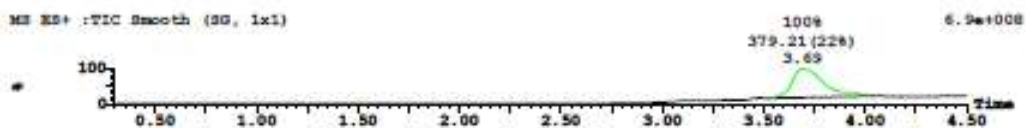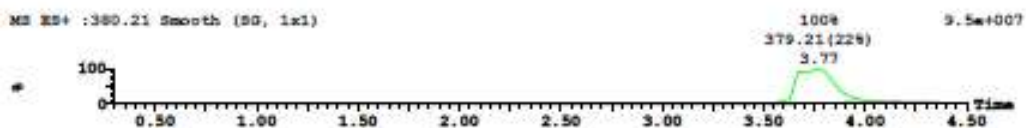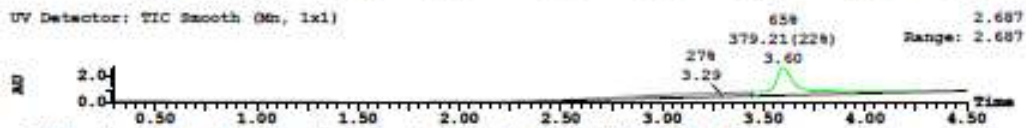

| Peak Number | Compound | Time | AreaAbs | Area %Total | Width | Height | Mass Found |
|-------------|----------|------|---------|-------------|-------|--------|------------|
| 1           |          | 3.29 | 1e+005  | 26.55       | 1     | 3e+005 |            |
| 2           |          | 3.44 | 4e+004  | 8.24        | 0     | 3e+005 |            |
| 3           | Found    | 3.60 | 3e+005  | 65.11       | 1     | 2e+005 | 379.21     |

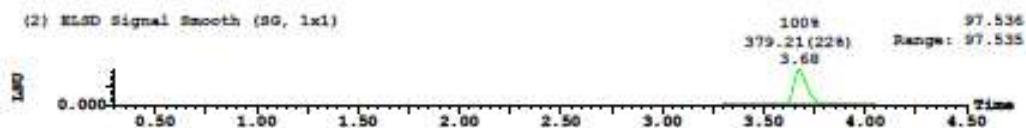

| Peak Number | Compound | Time | AreaAbs | Area %Total | Width | Height | Mass Found |
|-------------|----------|------|---------|-------------|-------|--------|------------|
| 3           | Found    | 3.68 | 8e+003  | 100.00      | 0     | 1e+005 | 379.21     |

| Peak ID | Compound | Time | Mass Found |
|---------|----------|------|------------|
| 3       | Found    | 3.69 | 379.21     |

SAMPLE: 5, 1:2, C 3: (Time: 3.77) Combine (221:227-(188:190+258:260))

1:MS ES+  
 8.5e+007

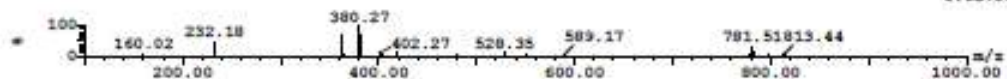

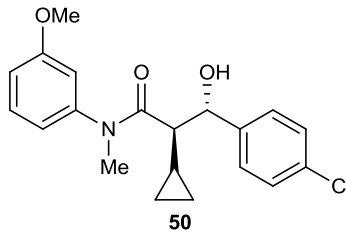

Chemical Formula: C<sub>20</sub>H<sub>22</sub>ClNO<sub>3</sub>  
Exact Mass: 359.13

Sample Report:

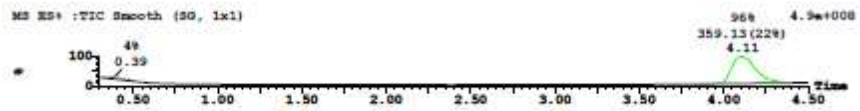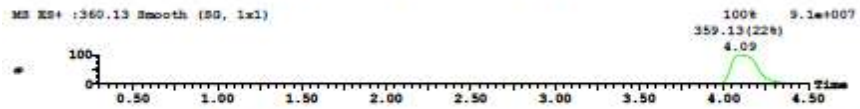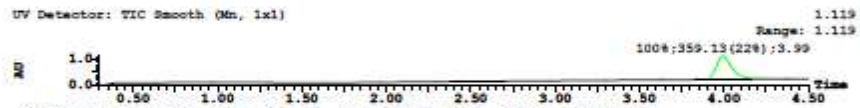

| Peak Number | Compound | Time | AreaAbs | Area %Total | Width | Height | Mass Found |
|-------------|----------|------|---------|-------------|-------|--------|------------|
| 2           | Found    | 3.99 | 1e+005  | 100.00      | 0     | Se+005 | 359.13     |

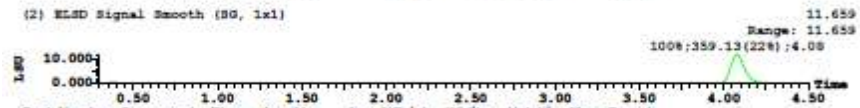

| Peak Number | Compound | Time | AreaAbs | Area %Total | Width | Height | Mass Found |
|-------------|----------|------|---------|-------------|-------|--------|------------|
| 2           | Found    | 4.08 | 1e+003  | 100.00      | 0     | 1e+004 | 359.13     |

| Peak ID | Compound | Time | Mass Found |
|---------|----------|------|------------|
| 2       | Found    | 4.11 | 359.13     |

SAMPLE: 5,1:5,B 2: (Time: 4.09) Combine (240:246-(207:209+277:279)) 1:MS ES+  
8.5e+007

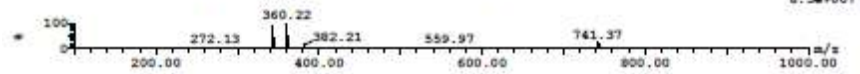

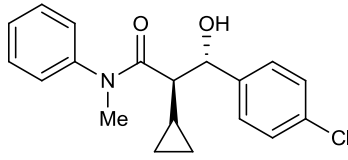

51

Chemical Formula: C<sub>19</sub>H<sub>20</sub>ClNO<sub>2</sub>  
 Exact Mass: 329.12

Sample Report:

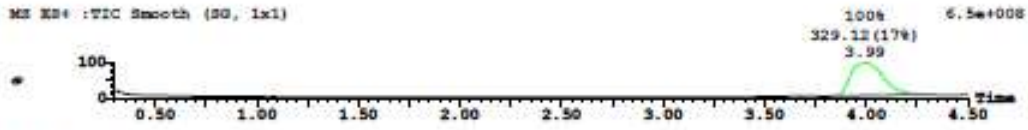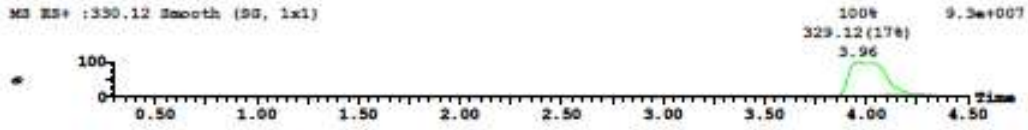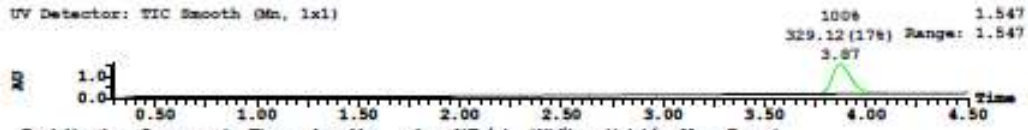

| Peak Number | Compound | Time | AreaAbs | Area%Total | Width | Height | Mass Found |
|-------------|----------|------|---------|------------|-------|--------|------------|
| 1           | Found    | 3.87 | 1e+005  | 100.00     | 0     | 1e+005 | 329.12     |

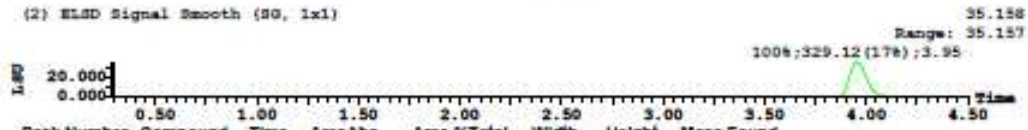

| Peak Number | Compound | Time | AreaAbs | Area%Total | Width | Height | Mass Found |
|-------------|----------|------|---------|------------|-------|--------|------------|
| 1           | Found    | 3.95 | 3e+003  | 100.00     | 0     | 4e+004 | 329.12     |

| Peak ID | Compound | Time | Mass Found |
|---------|----------|------|------------|
| 1       | Found    | 3.99 | 329.12     |

SAMPLE: 5,1:3,B 1: (Time: 3.96) Combine (232:238-(199:201+269:271)) 1:MS ES+ 8.5e+007

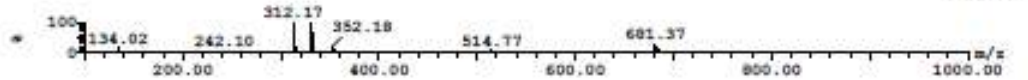



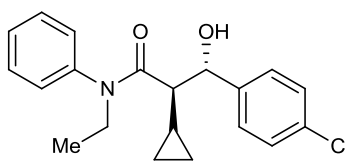

52  
 Chemical Formula: C<sub>20</sub>H<sub>22</sub>ClNO<sub>2</sub>  
 Exact Mass: 343.13

Sample Report:

MS ES+ : TIC Smooth (80, 1x1) 6.0e+008

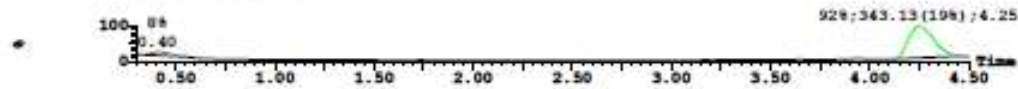

MS ES+ : 344.13 Smooth (80, 1x1) 9.3e+007

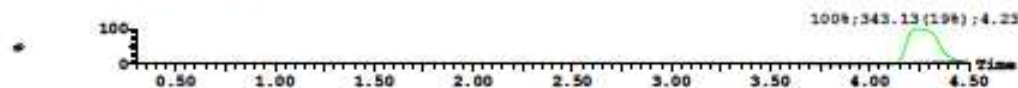

UV Detector: TIC Smooth (Mn, 1x1) 9.144e-1

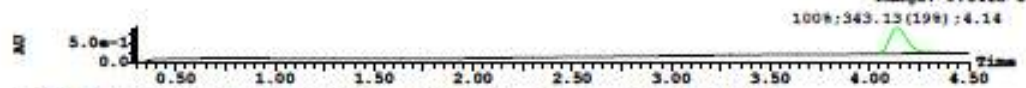

| Peak Number | Compound | Time | AreaAbs | Area %Total | Width | Height | Mass Found |
|-------------|----------|------|---------|-------------|-------|--------|------------|
| 2           | Found    | 4.14 | 7e+004  | 100.00      | 0     | 7e+005 | 343.13     |

(2) ELSI Signal Smooth (80, 1x1) 14.211

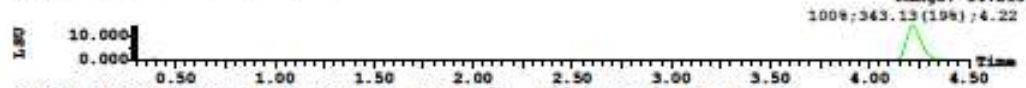

| Peak Number | Compound | Time | AreaAbs | Area %Total | Width | Height | Mass Found |
|-------------|----------|------|---------|-------------|-------|--------|------------|
| 2           | Found    | 4.22 | 1e+003  | 100.00      | 0     | 1e+004 | 343.13     |

| Peak ID | Compound | Time | Mass Found |
|---------|----------|------|------------|
| 2       | Found    | 4.25 | 343.13     |

SAMPLE: 5,1:4,B 2: (Time: 4.23) Combine (248:254-(215:217+285:287)) 1:MS ES+ 8.2e+007

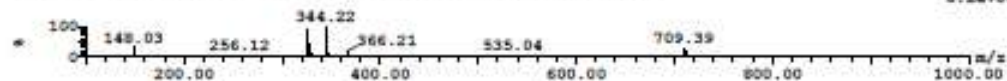

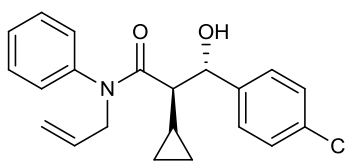

**53**  
 Chemical Formula: C<sub>21</sub>H<sub>22</sub>ClNO<sub>2</sub>  
 Exact Mass: 355.13

Sample Report:

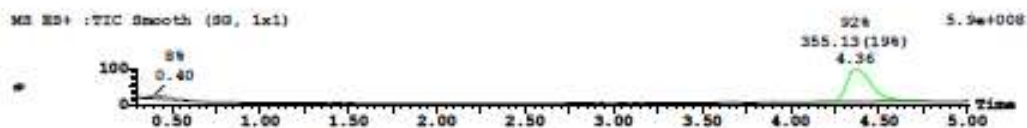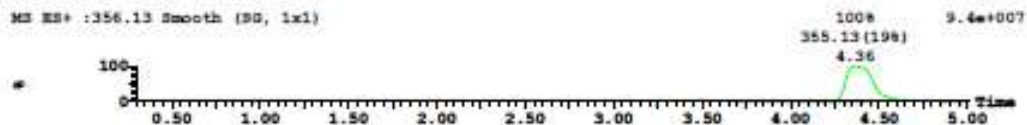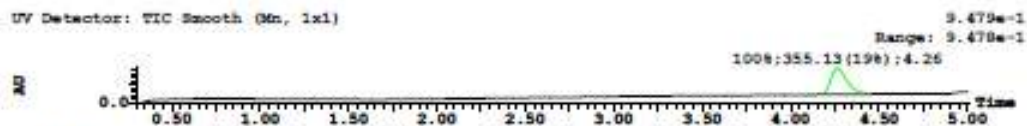

| Peak Number | Compound | Time | AreaAbs | Area %Total | Width | Height | Mass Found |
|-------------|----------|------|---------|-------------|-------|--------|------------|
| 2           | Found    | 4.26 | 8e+004  | 100.00      | 0     | 7e+005 | 355.13     |

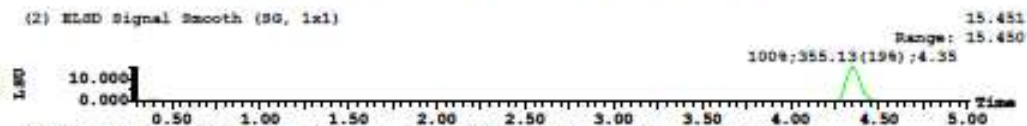

| Peak Number | Compound | Time | AreaAbs | Area %Total | Width | Height | Mass Found |
|-------------|----------|------|---------|-------------|-------|--------|------------|
| 2           | Found    | 4.35 | 1e+003  | 100.00      | 0     | 2e+004 | 355.13     |

| Peak ID | Compound | Time | Mass Found |
|---------|----------|------|------------|
| 2       | Found    | 4.36 | 355.13     |

SAMPLE: 5,1:6, B 2: (Time: 4.36) Combine (256:262-(223:225+293:295)) 1:MS ES+ 8.7e+007

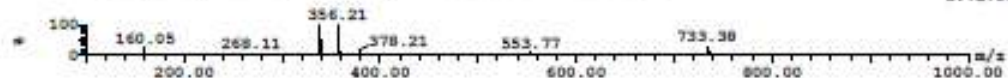

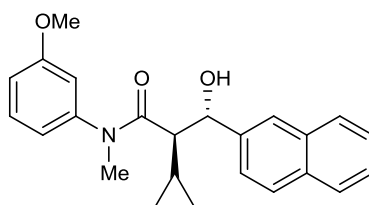

54

Chemical Formula: C<sub>24</sub>H<sub>25</sub>NO<sub>3</sub>

Exact Mass: 375.18

Sample Report:

MS ES+ : TIC Smooth (90, 1x1) 5.1e+008

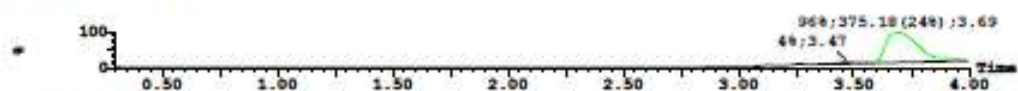

MS ES+ : 376.18 Smooth (90, 1x1) 9.5e+007

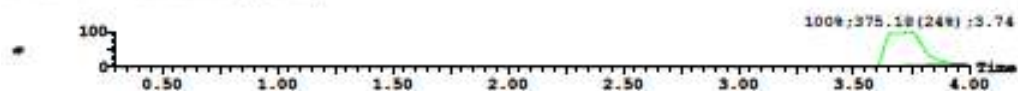

UV Detector: TIC Smooth (Mn, 1x1) 2.677

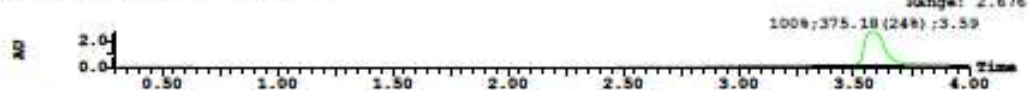

| Peak Number | Compound | Time | AreaAbs | Area %Total | Width | Height | Mass Found |
|-------------|----------|------|---------|-------------|-------|--------|------------|
| 2           | Found    | 3.59 | 3e+005  | 100.00      | 0     | 2e+005 | 375.18     |

(2) ELSID Signal Smooth (90, 1x1) 49.477

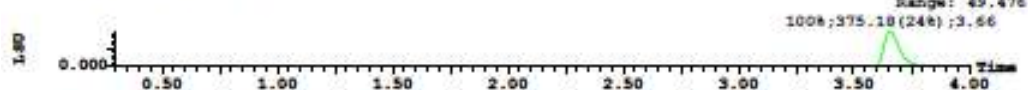

| Peak Number | Compound | Time | AreaAbs | Area %Total | Width | Height | Mass Found |
|-------------|----------|------|---------|-------------|-------|--------|------------|
| 2           | Found    | 3.66 | 4e+003  | 100.00      | 0     | 5e+004 | 375.18     |

| Peak ID | Compound | Time | Mass Found |
|---------|----------|------|------------|
| 2       | Found    | 3.69 | 375.18     |

SAMPLE: 5, 1:3, A 2: (Time: 3.74) Combine (219:225-(186:188+256:258)) 1:MS ES+ 8.7e+007

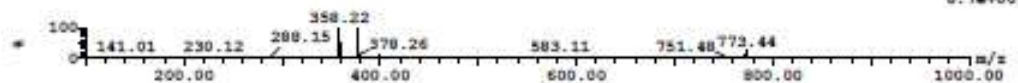

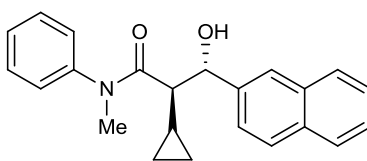

55  
 Chemical Formula: C<sub>23</sub>H<sub>23</sub>NO<sub>2</sub>  
 Exact Mass: 345.17

Sample Report:

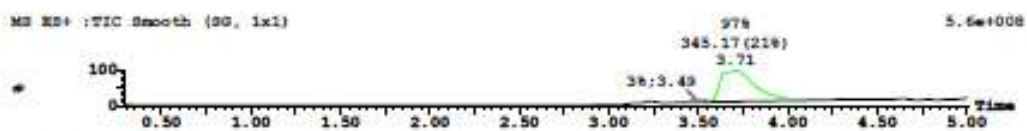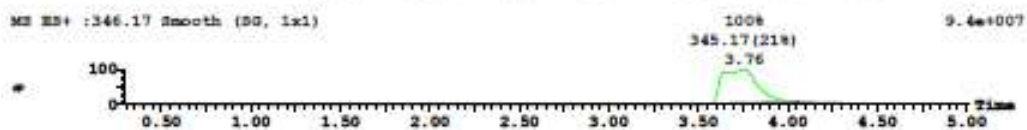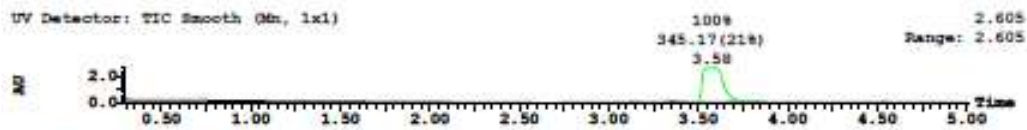

| Peak Number | Compound | Time | AreaAbs | Area %Total | Width | Height | Mass Found |
|-------------|----------|------|---------|-------------|-------|--------|------------|
| 2           | Found    | 3.58 | 3e+005  | 100.00      | 0     | 3e+005 | 345.17     |

  

| Peak Number | Compound | Time | AreaAbs | Area %Total | Width | Height | Mass Found |
|-------------|----------|------|---------|-------------|-------|--------|------------|
| 2           | Found    | 3.63 | 1e+004  | 100.00      | 0     | 1e+005 | 345.17     |

| Peak ID | Compound | Time | Mass Found |
|---------|----------|------|------------|
| 2       | Found    | 3.71 | 345.17     |

SAMPLE: 5, 1:1, A 2: (Time: 3.76) Combine (220:226-(187:189+257:259)) 1:MS ES+ 0.6e+007

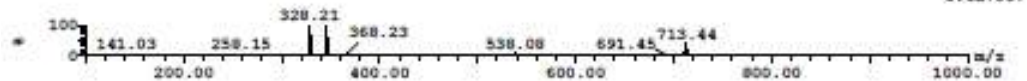

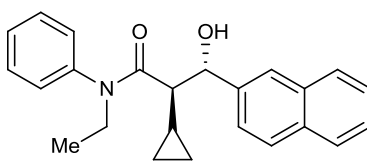

**56**  
 Chemical Formula: C<sub>24</sub>H<sub>25</sub>NO<sub>2</sub>  
 Exact Mass: 359.19

Sample Report:

MS ES+ : TIC Smooth (90, 1x1) 5.9e+008

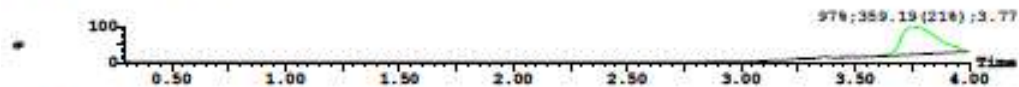

MS ES+ : 360.19 Smooth (50, 1x1) 9.2e+007

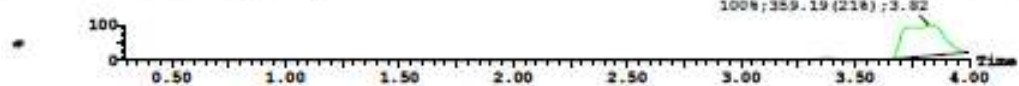

UV Detector: TIC Smooth (Mn, 1x1) 2.687

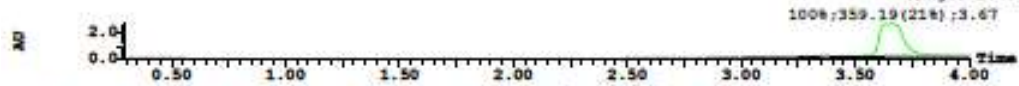

| Peak Number | Compound | Time | AreaAbs | Area %Total | Width | Height | Mass Found |
|-------------|----------|------|---------|-------------|-------|--------|------------|
| 2           | Found    | 3.67 | 3e+005  | 100.00      | 1     | 2e+005 | 359.19     |

(2) ELSID Signal Smooth (90, 1x1) 117.184

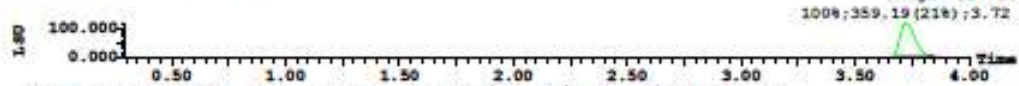

| Peak Number | Compound | Time | AreaAbs | Area %Total | Width | Height | Mass Found |
|-------------|----------|------|---------|-------------|-------|--------|------------|
| 2           | Found    | 3.72 | 8e+003  | 100.00      | 0     | 1e+005 | 359.19     |

| Peak ID | Compound | Time | Mass Found |
|---------|----------|------|------------|
| 2       | Found    | 3.77 | 359.19     |

SAMPLE: 5, 1:2, A 2: (Time: 3.82) Combine (224:230--(191:193+261:263)) 1:MS ES+ 8.6e+007

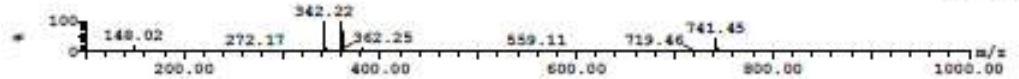

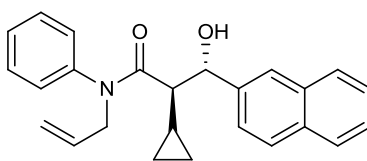

57

Chemical Formula: C<sub>25</sub>H<sub>25</sub>NO<sub>2</sub>

Exact Mass: 371.19

Sample Report:

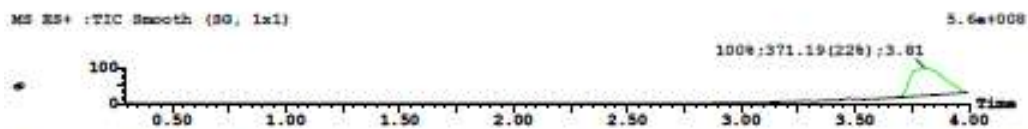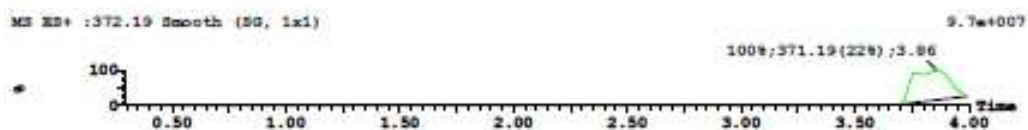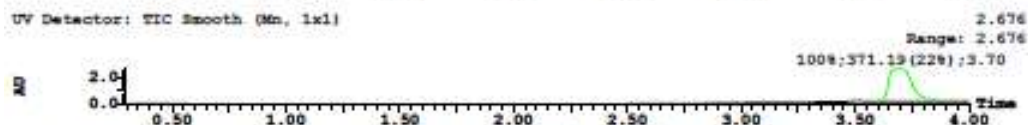

| Peak Number | Compound | Time | AreaAbs | Area %Total | Width | Height | Mass Found |
|-------------|----------|------|---------|-------------|-------|--------|------------|
| 1           | Found    | 3.70 | 3e+005  | 100.00      | 0     | 2e+006 | 371.19     |

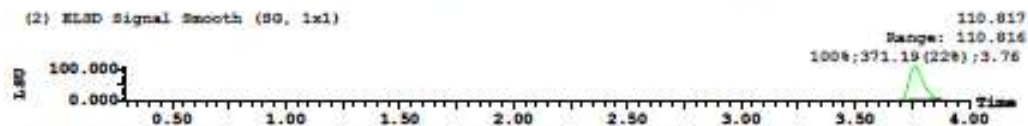

| Peak Number | Compound | Time | AreaAbs | Area %Total | Width | Height | Mass Found |
|-------------|----------|------|---------|-------------|-------|--------|------------|
| 1           | Found    | 3.76 | 8e+003  | 100.00      | 0     | 1e+005 | 371.19     |

| Peak ID | Compound | Time | Mass Found |
|---------|----------|------|------------|
| 1       | Found    | 3.81 | 371.19     |

SAMPLE: S\_1:4\_A\_1: (Time: 3.86) Combine (226:232-(193:195+263:265))

1:MS ES+  
8.9e+007

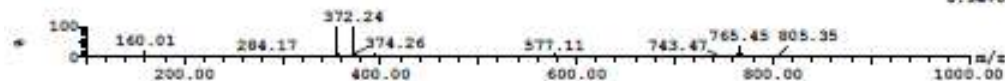

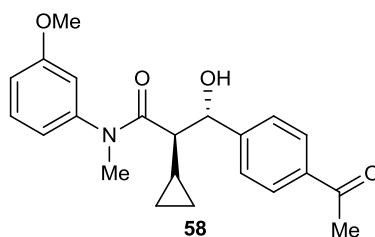

58  
 Chemical Formula: C<sub>22</sub>H<sub>25</sub>NO<sub>4</sub>  
 Exact Mass: 367.18

Sample Report:

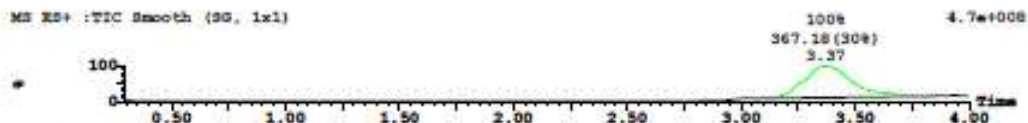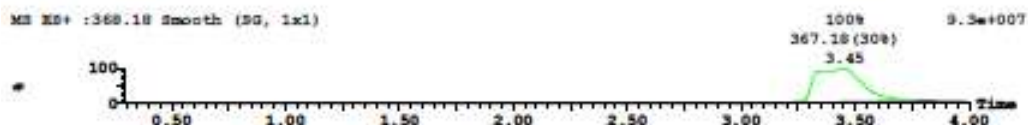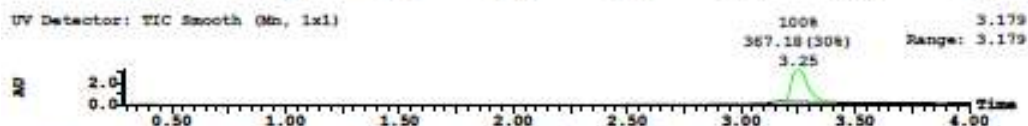

| Peak Number | Compound | Time | AreaAbs | Area %Total | Width | Height | Mass Found |
|-------------|----------|------|---------|-------------|-------|--------|------------|
| 1           | Found    | 3.25 | 2e+005  | 100.00      | 0     | 3e+005 | 367.18     |

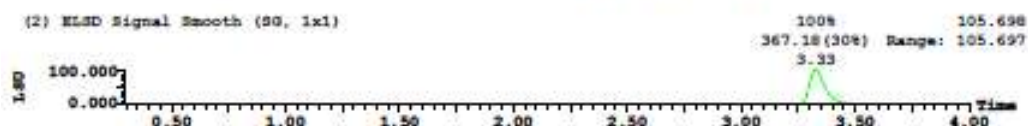

| Peak Number | Compound | Time | AreaAbs | Area %Total | Width | Height | Mass Found |
|-------------|----------|------|---------|-------------|-------|--------|------------|
| 1           | Found    | 3.33 | 8e+003  | 100.00      | 1     | 1e+005 | 367.18     |

| Peak ID | Compound | Time | Mass Found |
|---------|----------|------|------------|
| 1       | Found    | 3.37 | 367.18     |

SAMPLE: 5, 1:1, B 1: (Time: 3.45) Combine (202:208-(169:171+239:241)) 1:MS ES+ 8.4e+007

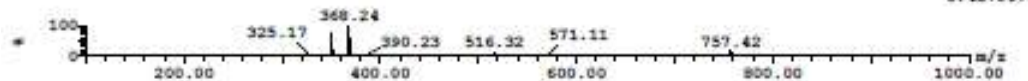

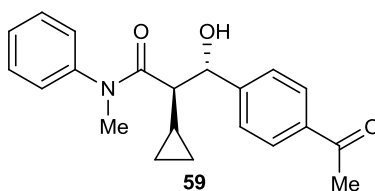

59  
 Chemical Formula: C<sub>21</sub>H<sub>23</sub>NO<sub>3</sub>  
 Exact Mass: 337.17

Sample Report:

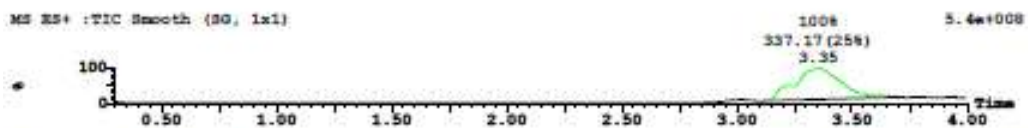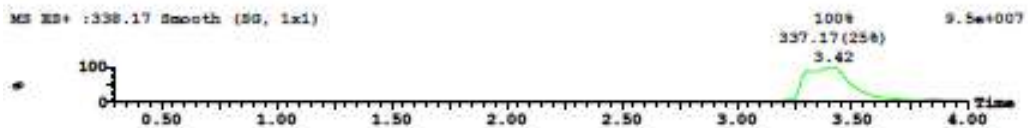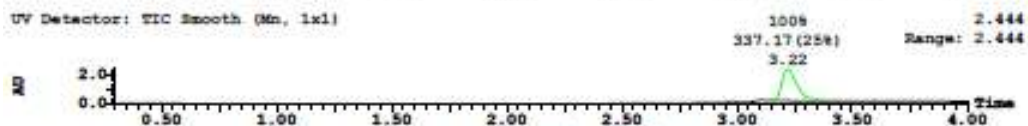

| Peak Number | Compound | Time | AreaAbs | Area%Total | Width | Height | Mass Found |
|-------------|----------|------|---------|------------|-------|--------|------------|
| 1           | Found    | 3.22 | 2e+005  | 100.00     | 0     | 2e+006 | 337.17     |

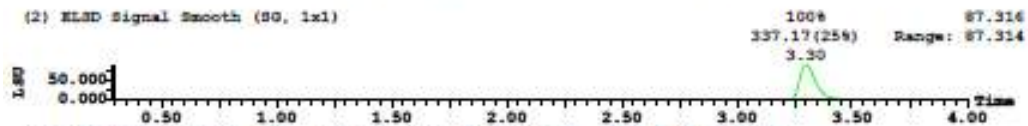

| Peak Number | Compound | Time | AreaAbs | Area%Total | Width | Height | Mass Found |
|-------------|----------|------|---------|------------|-------|--------|------------|
| 1           | Found    | 3.30 | 7e+003  | 100.00     | 0     | 9e+004 | 337.17     |

| Peak ID | Compound | Time | Mass Found |
|---------|----------|------|------------|
| 1       | Found    | 3.35 | 337.17     |

SAMPLE: S,1:5,A 1: (Time: 3.42) Combine (200:206-(167:169+237:239)) 1:MS MS+ 9.5e+007

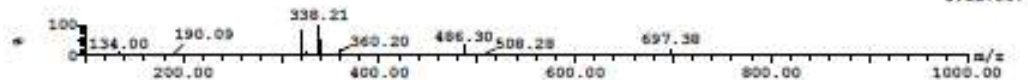



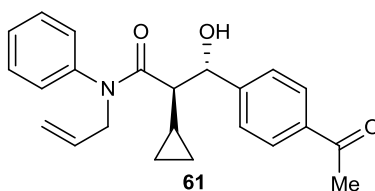

61  
 Chemical Formula: C<sub>23</sub>H<sub>25</sub>NO<sub>3</sub>  
 Exact Mass: 363.18

Sample Report:

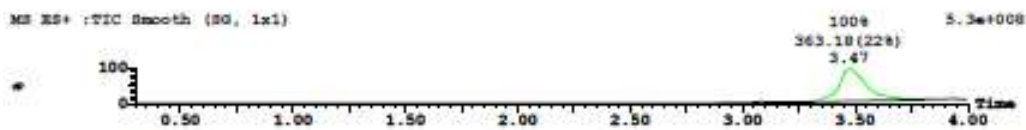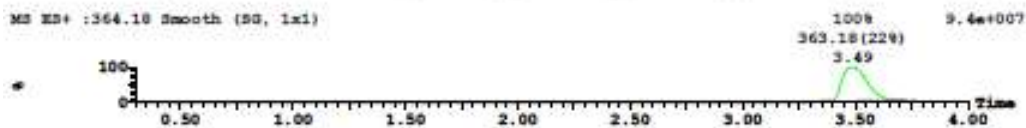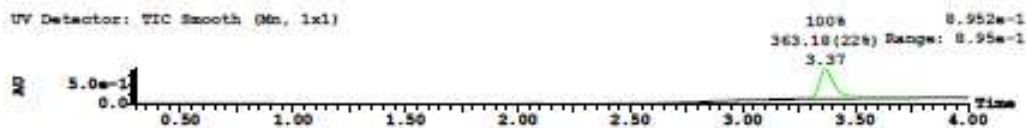

| Peak Number | Compound | Time | AreaAbs | Area %Total | Width | Height | Mass Found |
|-------------|----------|------|---------|-------------|-------|--------|------------|
| 1           | Found    | 3.37 | 7e+004  | 100.00      | 1     | 8e+005 | 363.18     |

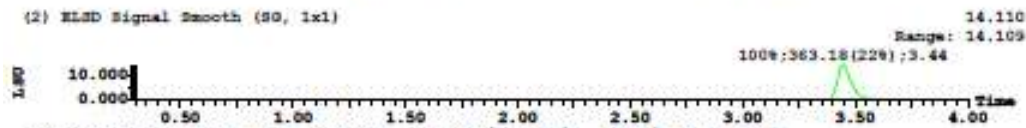

| Peak Number | Compound | Time | AreaAbs | Area %Total | Width | Height | Mass Found |
|-------------|----------|------|---------|-------------|-------|--------|------------|
| 1           | Found    | 3.44 | 1e+003  | 100.00      | 0     | 1e+004 | 363.18     |

| Peak ID | Compound | Time | Mass Found |
|---------|----------|------|------------|
| 1       | Found    | 3.47 | 363.18     |

SAMPLE: S, 1:2, B 1: (Time: 3.49) Combine (204:210-(171:173+241:243)) 1:MS ES+ 9.3e+007

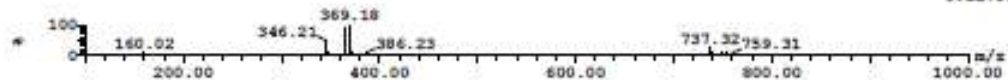

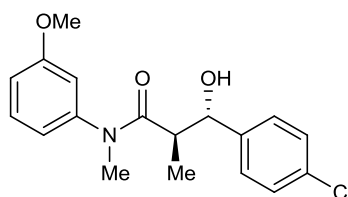

62

Chemical Formula: C<sub>18</sub>H<sub>20</sub>ClNO<sub>3</sub>

Exact Mass: 333.11

Sample Report:

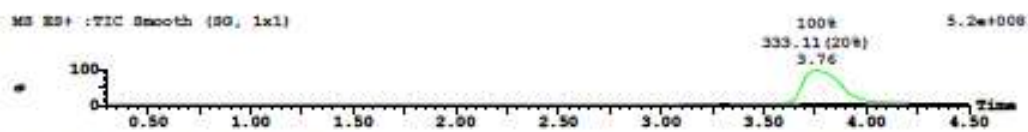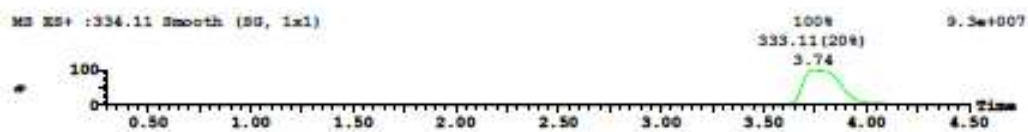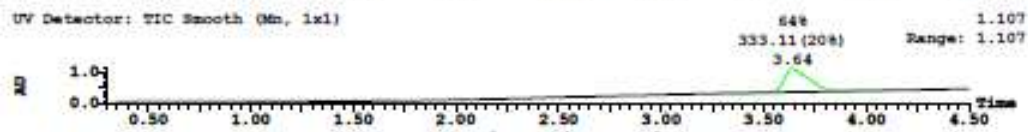

| Peak Number | Compound | Time | AreaAbs | Area %Total | Width | Height | Mass Found |
|-------------|----------|------|---------|-------------|-------|--------|------------|
| 1           |          | 0.47 | 6e+004  | 35.92       | 1     | 9e+004 |            |
| 2           | Found    | 3.64 | 1e+005  | 64.08       | 1     | 7e+005 | 333.11     |

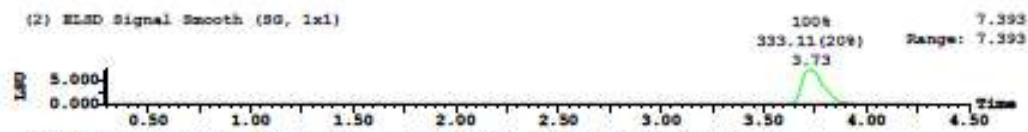

| Peak Number | Compound | Time | AreaAbs | Area %Total | Width | Height | Mass Found |
|-------------|----------|------|---------|-------------|-------|--------|------------|
| 2           | Found    | 3.73 | 9e+002  | 100.00      | 0     | 7e+003 | 333.11     |

| Peak ID | Compound | Time | Mass Found |
|---------|----------|------|------------|
| 2       | Found    | 3.76 | 333.11     |

SAMPLE: S,1:6,B 2: (Time: 3.74) Combine (219:225-(186:188+256:258))

1: MS ES+  
9.2e+007

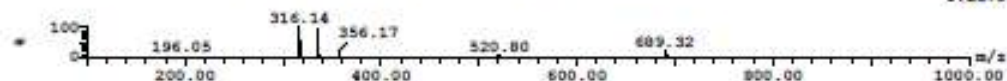

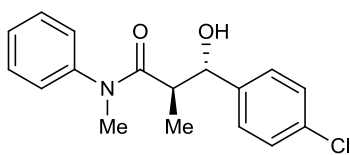

**63**  
 Chemical Formula: C<sub>17</sub>H<sub>18</sub>ClNO<sub>2</sub>  
 Exact Mass: 303.10

Sample Report:

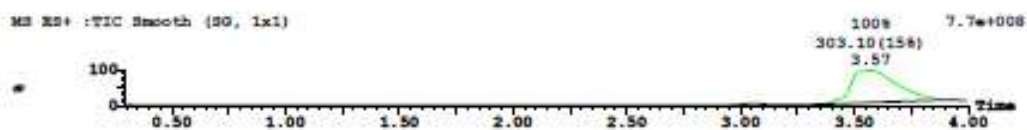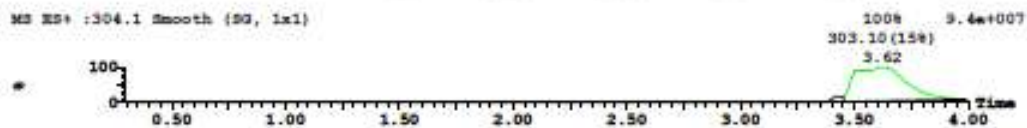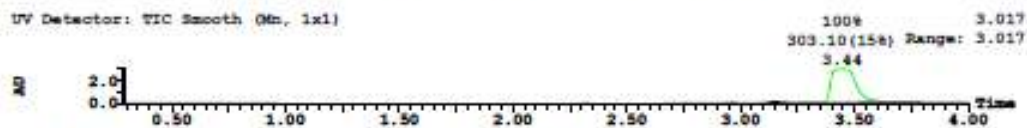

| Peak Number | Compound | Time | AreaAbc | Area %Total | Width | Height | Mass Found |
|-------------|----------|------|---------|-------------|-------|--------|------------|
| 1           | Found    | 3.44 | 4e+005  | 100.00      | 0     | 3e+005 | 303.10     |

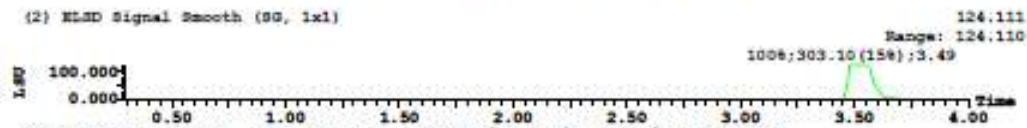

| Peak Number | Compound | Time | AreaAbc | Area %Total | Width | Height | Mass Found |
|-------------|----------|------|---------|-------------|-------|--------|------------|
| 1           | Found    | 3.49 | 2e+004  | 100.00      | 0     | 1e+005 | 303.10     |

| Peak ID | Compound | Time | Mass Found |
|---------|----------|------|------------|
| 1       | Found    | 3.57 | 303.10     |

SAMPLE: 5,1:4,B 1: (Time: 3.62) Combine (212:218-(179:181+249:251)) 1:MS ES+ 8.8e+007

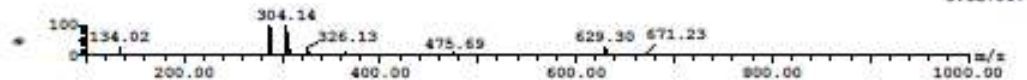

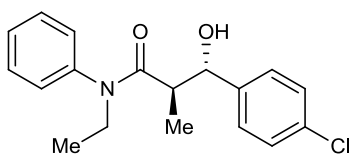

**64**  
 Chemical Formula: C<sub>18</sub>H<sub>20</sub>ClNO<sub>2</sub>  
 Exact Mass: 317.12

Sample Report:

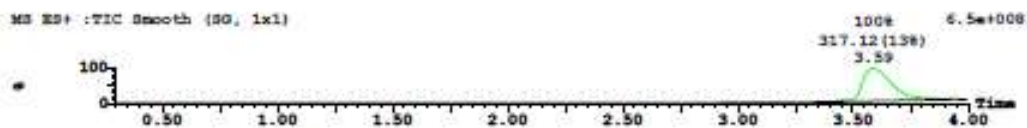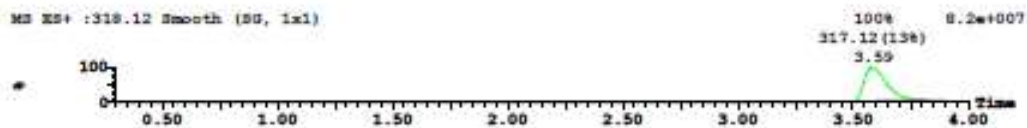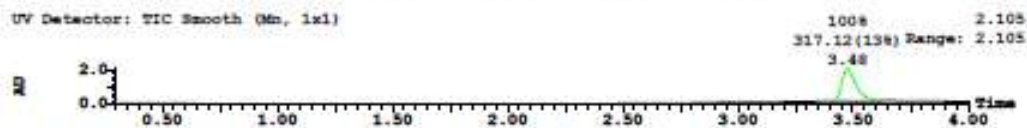

| Peak Number | Compound | Time | AreaAbs | Area %Total | Width | Height | Mass Found |
|-------------|----------|------|---------|-------------|-------|--------|------------|
| 1           | Found    | 3.48 | 1e+005  | 100.00      | 0     | 2e+005 | 317.12     |

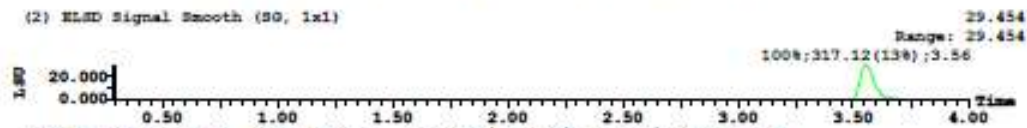

| Peak Number | Compound | Time | AreaAbs | Area %Total | Width | Height | Mass Found |
|-------------|----------|------|---------|-------------|-------|--------|------------|
| 1           | Found    | 3.56 | 2e+003  | 100.00      | 0     | 3e+004 | 317.12     |

| Peak ID | Compound | Time | Mass Found |
|---------|----------|------|------------|
| 1       | Found    | 3.59 | 317.12     |

SAMPLE: S,1:5,B 1: (Time: 3.59) Combine (210:216-(177:179+247:249))

1:MS ES+  
8.9e+007

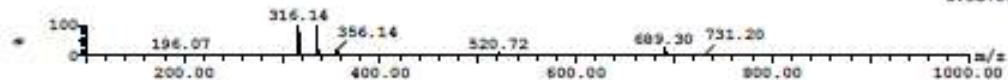

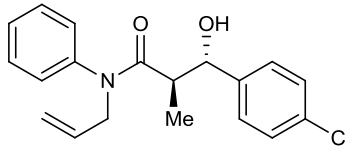

**65**  
 Chemical Formula: C<sub>19</sub>H<sub>20</sub>ClNO<sub>2</sub>  
 Exact Mass: 329.12

Sample Report:

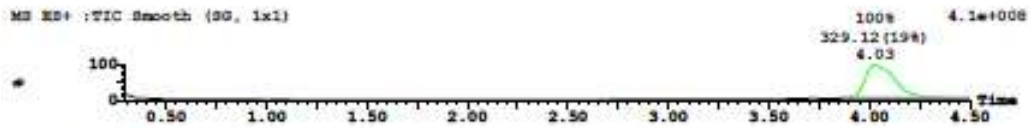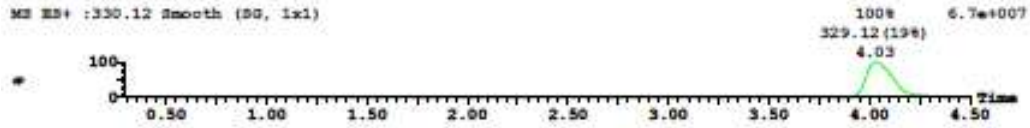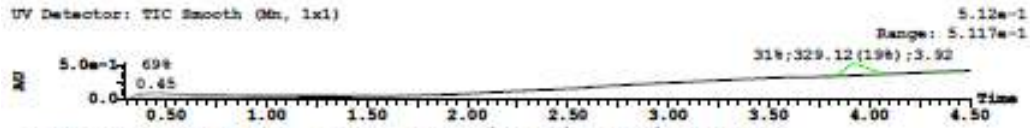

| Peak Number | Compound | Time | AreaAbs | Area %Total | Width | Height | Mass Found |
|-------------|----------|------|---------|-------------|-------|--------|------------|
| 2           |          | 0.45 | 5e+004  | 68.56       | 1     | 8e+004 |            |
| 5           | Found    | 3.92 | 2e+004  | 31.34       | 1     | 2e+005 | 329.12     |

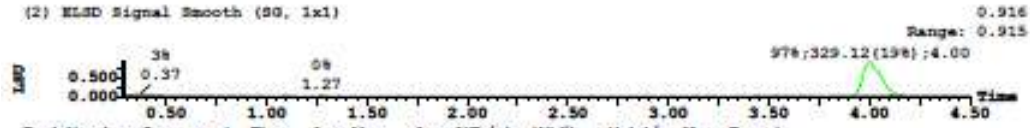

| Peak Number | Compound | Time | AreaAbs | Area %Total | Width | Height | Mass Found |
|-------------|----------|------|---------|-------------|-------|--------|------------|
| 1           |          | 0.37 | 3e+000  | 2.68        | 0     | 4e+001 |            |
| 3           |          | 1.27 | 4e+001  | 0.44        | 0     | 5e+001 |            |
| 4           |          | 1.29 | 2e+001  | 0.15        | 0     | 2e+001 |            |
| 5           | Found    | 4.00 | 5e+001  | 96.73       | 0     | 5e+002 | 329.12     |

| Peak ID | Compound | Time | Mass Found |
|---------|----------|------|------------|
| 5       | Found    | 4.03 | 329.12     |

SAMPLE: 5, 1:1, C 5: (Time: 4.03) Combine (236:242-(203:205+273:275))

1:MS ES+  
7.8e+007

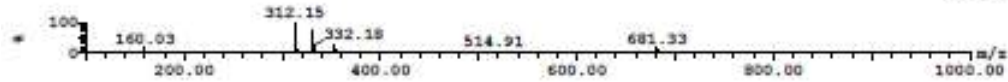

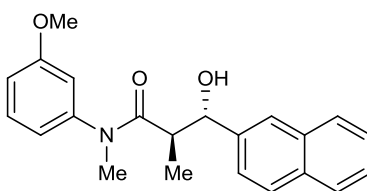

66

Chemical Formula: C<sub>22</sub>H<sub>23</sub>NO<sub>3</sub>

Exact Mass: 349.17

Date: 01-Jun-2011 File: 279 CP Page 1

Sample Report:

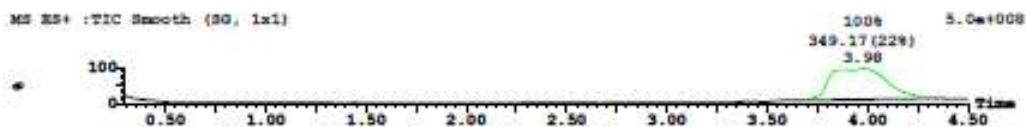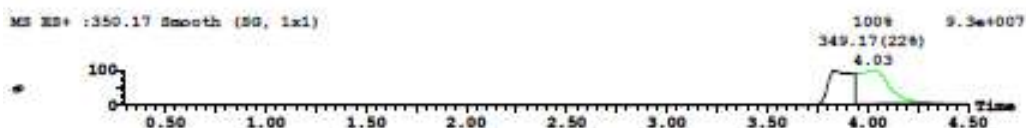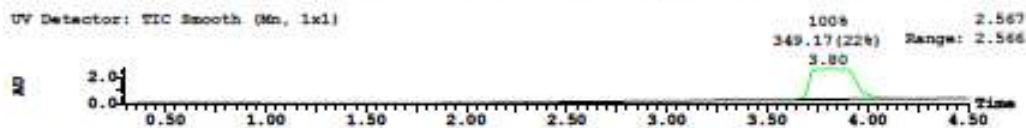

| Peak Number | Compound | Time | AreaAbs | Area %Total | Width | Height | Mass Found |
|-------------|----------|------|---------|-------------|-------|--------|------------|
| 1           | Found    | 3.80 | 6e+005  | 100.00      | 1     | 2e+006 | 349.17     |

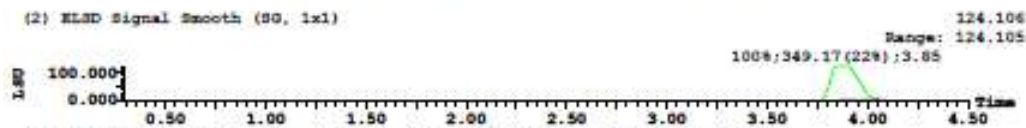

| Peak Number | Compound | Time | AreaAbs | Area %Total | Width | Height | Mass Found |
|-------------|----------|------|---------|-------------|-------|--------|------------|
| 1           | Found    | 3.85 | 2e+004  | 100.00      | 0     | 1e+005 | 349.17     |

| Peak ID | Compound | Time | Mass Found |
|---------|----------|------|------------|
| 1       | Found    | 3.98 | 349.17     |

SAMPLE: S,1:4,C 1: (Time: 4.03) Combine (236:242-(203:205+273:275)) 1:MS ES+ 9.7e+007

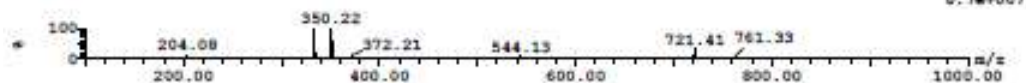

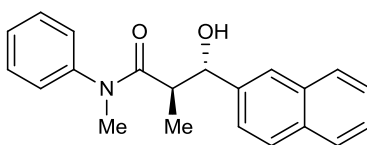

67  
 Chemical Formula: C<sub>21</sub>H<sub>21</sub>NO<sub>2</sub>  
 Exact Mass: 319.16

Sample Report:

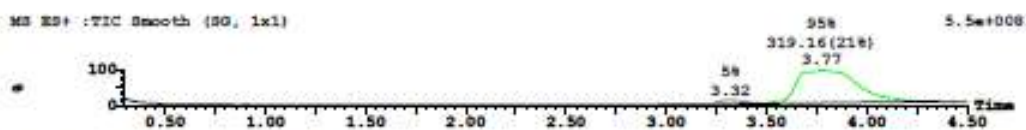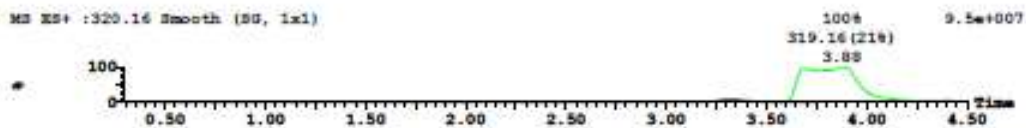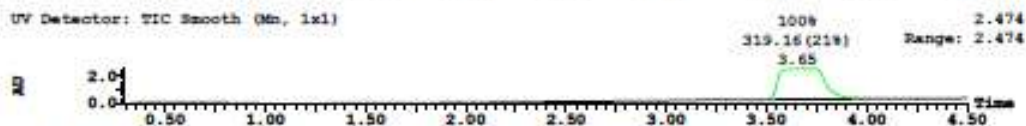

| Peak Number | Compound | Time | AreaAbs | Area %Total | Width | Height | Mass Found |
|-------------|----------|------|---------|-------------|-------|--------|------------|
| 2           | Found    | 3.65 | 6e+005  | 100.00      | 1     | 2e+005 | 319.16     |

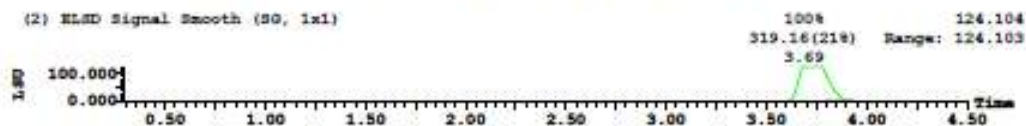

| Peak Number | Compound | Time | AreaAbs | Area %Total | Width | Height | Mass Found |
|-------------|----------|------|---------|-------------|-------|--------|------------|
| 2           | Found    | 3.69 | 2e+004  | 100.00      | 0     | 1e+005 | 319.16     |

| Peak ID | Compound | Time | Mass Found |
|---------|----------|------|------------|
| 2       | Found    | 3.77 | 319.16     |

SAMPLE: 5,1:2,C 2: (Time: 3.88) Combine (227:233-(194:196+264:266)) 1:MS ES+ 8.7e+007

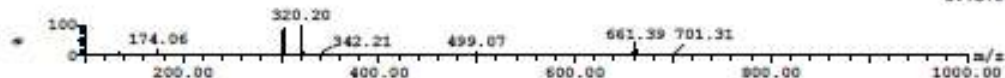

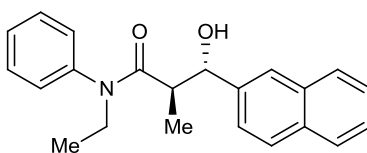

68

Chemical Formula: C<sub>22</sub>H<sub>23</sub>NO<sub>2</sub>

Exact Mass: 333.17

Sample Report:

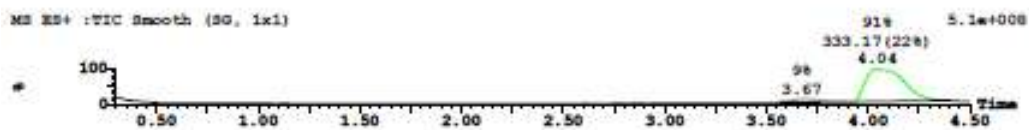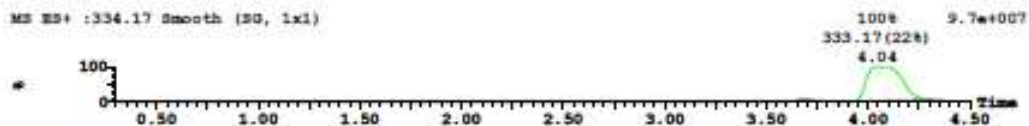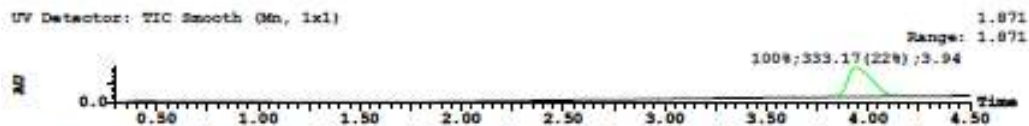

| Peak Number | Compound | Time | AreaAbs | Area %Total | Width | Height | Mass Found |
|-------------|----------|------|---------|-------------|-------|--------|------------|
| 2           | Found    | 3.94 | 2e+005  | 100.00      | 0     | 2e+005 | 333.17     |

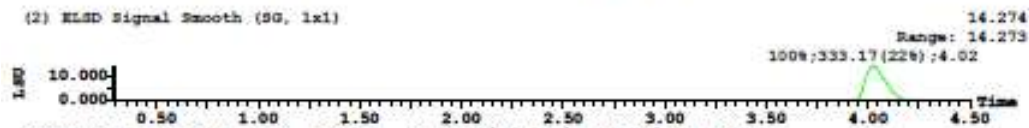

| Peak Number | Compound | Time | AreaAbs | Area %Total | Width | Height | Mass Found |
|-------------|----------|------|---------|-------------|-------|--------|------------|
| 2           | Found    | 4.02 | 2e+003  | 100.00      | 0     | 1e+004 | 333.17     |

| Peak ID | Compound | Time | Mass Found |
|---------|----------|------|------------|
| 2       | Found    | 4.04 | 333.17     |

SAMPLE: 5,1:3,C 2: (Time: 4.04) Combine (237:243-(204:206+274:276)) 1:MS ES+ 9.1e+007

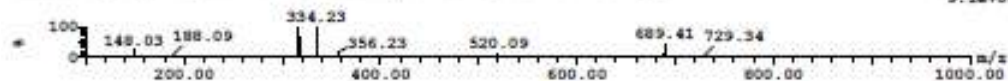



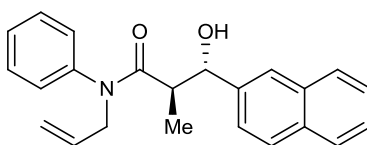

69

Chemical Formula: C<sub>23</sub>H<sub>23</sub>NO<sub>2</sub>

Exact Mass: 345.17

Sample Report:

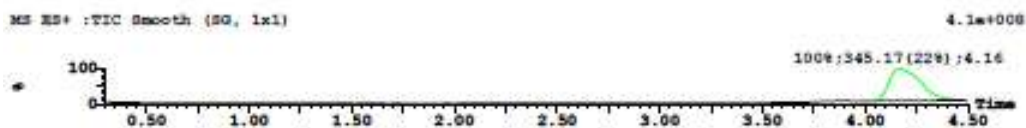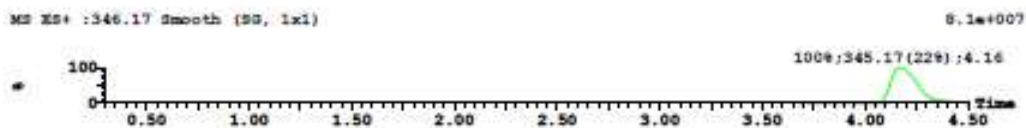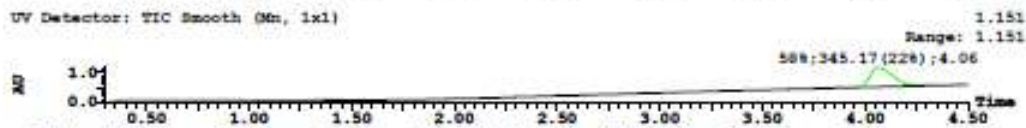

| Peak Number | Compound | Time | AreaAbs | Area %Total | Width | Height | Mass Found |
|-------------|----------|------|---------|-------------|-------|--------|------------|
| 1           |          | 0.47 | 6e+004  | 41.91       | 1     | 5e+004 |            |
| 2           | Found    | 4.06 | 8e+004  | 58.09       | 1     | 6e+005 | 345.17     |

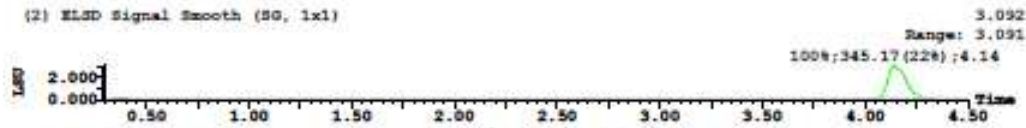

| Peak Number | Compound | Time | AreaAbs | Area %Total | Width | Height | Mass Found |
|-------------|----------|------|---------|-------------|-------|--------|------------|
| 2           | Found    | 4.14 | 3e+002  | 100.00      | 0     | 3e+003 | 345.17     |

| Peak ID | Compound | Time | Mass Found |
|---------|----------|------|------------|
| 2       | Found    | 4.16 | 345.17     |

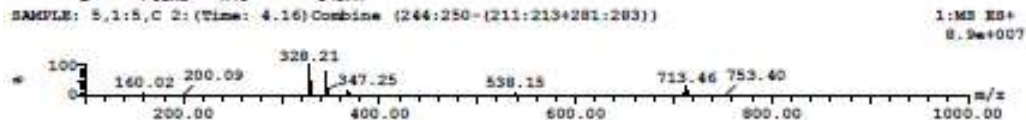

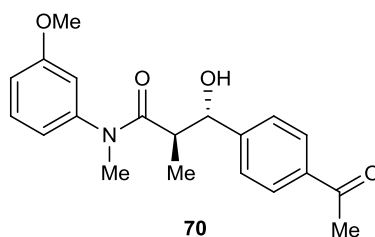

70  
 Chemical Formula: C<sub>20</sub>H<sub>23</sub>NO<sub>4</sub>  
 Exact Mass: 341.16

Sample Report:

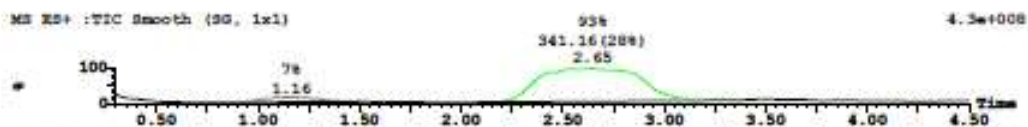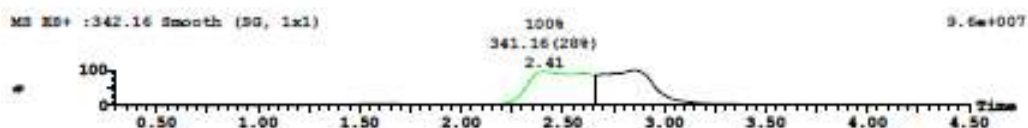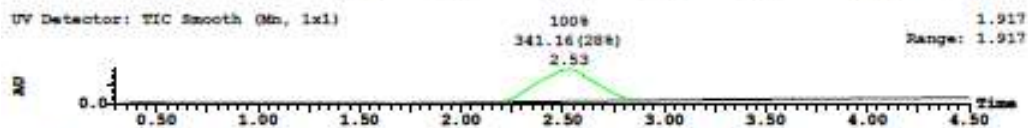

| Peak Number | Compound | Time | AreaAbs | Area %Total | Width | Height | Mass Found |
|-------------|----------|------|---------|-------------|-------|--------|------------|
| 2           | Found    | 2.53 | 6e+005  | 100.00      | 1     | 2e+006 | 341.16     |

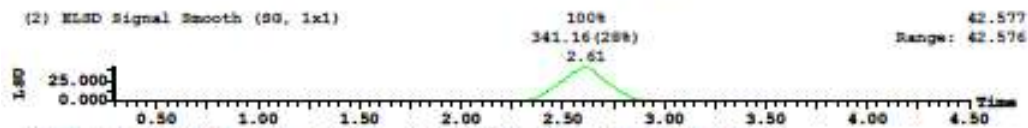

| Peak Number | Compound | Time | AreaAbs | Area %Total | Width | Height | Mass Found |
|-------------|----------|------|---------|-------------|-------|--------|------------|
| 2           | Found    | 2.61 | 1e+004  | 100.00      | 1     | 4e+004 | 341.16     |

| Peak ID | Compound | Time | Mass Found |
|---------|----------|------|------------|
| 2       | Found    | 2.65 | 341.16     |

SAMPLE: 5, 1:2, D 2: (Time: 2.41) Combine (140:146-(107:109+177:179)) 1: MS ES+ 7.6e+007

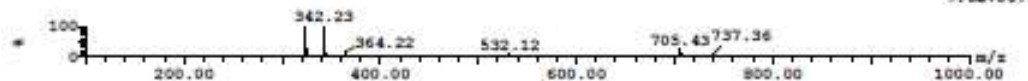

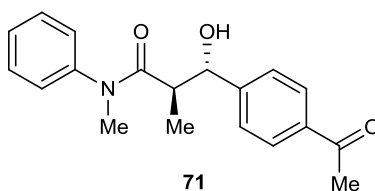

71  
 Chemical Formula: C<sub>19</sub>H<sub>21</sub>NO<sub>3</sub>  
 Exact Mass: 311.15

Sample Report:

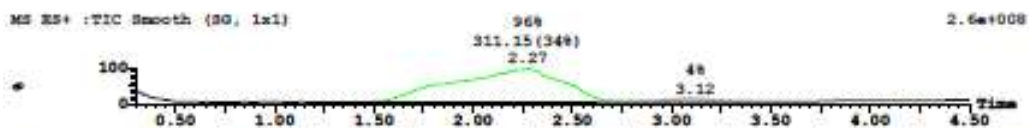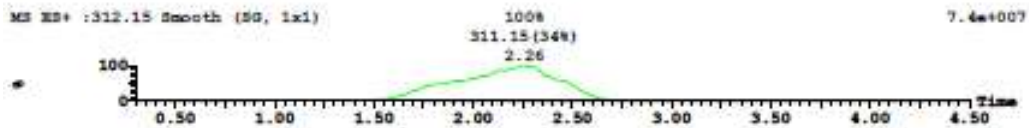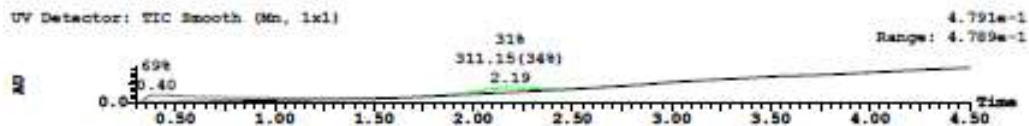

| Peak Number | Compound | Time | AreaAbs | Area %Total | Width | Height | Mass Found |
|-------------|----------|------|---------|-------------|-------|--------|------------|
| 1           |          | 0.40 | 5e-004  | 89.36       | 1     | 1e+005 |            |
| 4           | Found    | 2.19 | 2e+004  | 30.64       | 1     | 7e+004 | 311.15     |

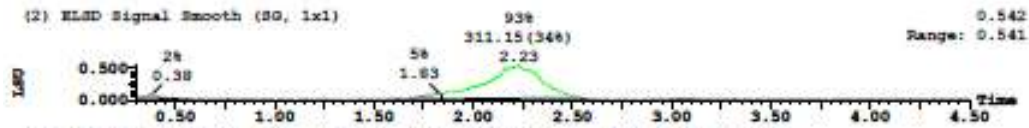

| Peak Number | Compound | Time | AreaAbs | Area %Total | Width | Height | Mass Found |
|-------------|----------|------|---------|-------------|-------|--------|------------|
| 1           |          | 0.38 | 3e+000  | 1.94        | 0     | 6e+001 |            |
| 2           |          | 1.63 | 1e+001  | 0.08        | 0     | 1e+001 |            |
| 3           |          | 1.83 | 5e+000  | 4.95        | 0     | 5e+001 |            |
| 4           | Found    | 2.23 | 2e+002  | 93.04       | 1     | 5e+002 | 311.15     |

Peak ID Compound Time Mass Found  
 4 Found 2.27 311.15  
 SAMPLE: 5,1:6,C 4: (Time: 2.26)Combine (131:137-(98:100+168:170)) 1:MS ES+ 6.3e+007

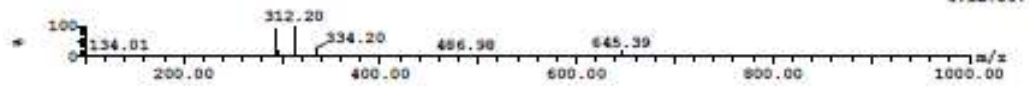

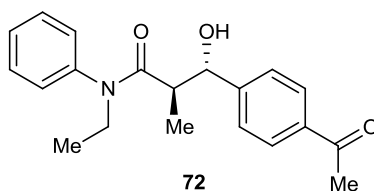

Chemical Formula: C<sub>20</sub>H<sub>23</sub>NO<sub>3</sub>  
 Exact Mass: 325.17

Sample Report:

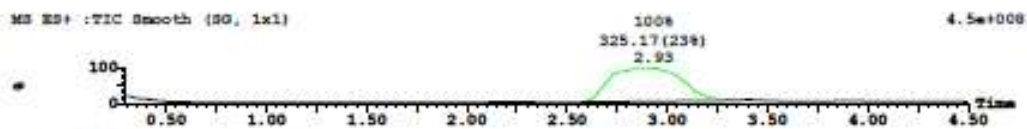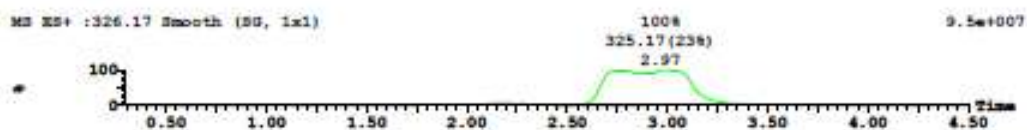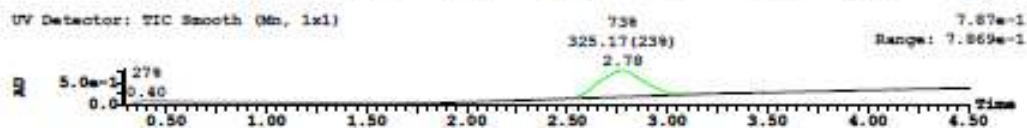

| Peak Number | Compound | Time | AreaAbs | Area %Total | Width | Height | Mass Found |
|-------------|----------|------|---------|-------------|-------|--------|------------|
| 1           |          | 0.40 | 6e+004  | 26.96       | 1     | 5e+004 |            |
| 2           | Found    | 2.78 | 2e+005  | 73.04       | 1     | 6e+005 | 325.17     |

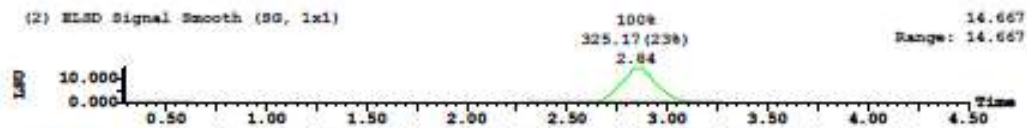

| Peak Number | Compound | Time | AreaAbs | Area %Total | Width | Height | Mass Found |
|-------------|----------|------|---------|-------------|-------|--------|------------|
| 2           | Found    | 2.84 | 3e+003  | 100.00      | 1     | 1e+004 | 325.17     |

| Peak ID | Compound | Time | Mass Found |
|---------|----------|------|------------|
| 2       | Found    | 2.93 | 325.17     |

SAMPLE: 5,1:1,D 2: (Time: 2.97) Combine (173:179-(140:142+210:212)) 1:MS ES+ 9.2e+007

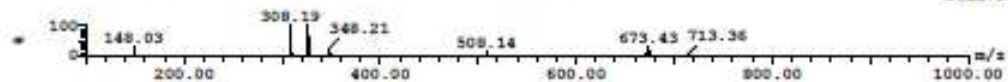

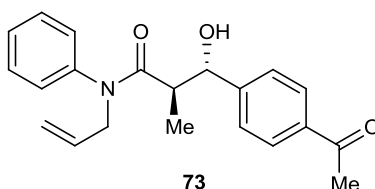

Chemical Formula: C<sub>21</sub>H<sub>23</sub>NO<sub>3</sub>  
Exact Mass: 337.17

Sample Report:

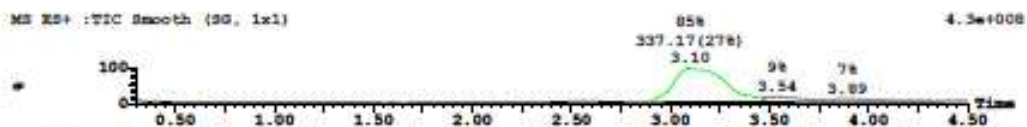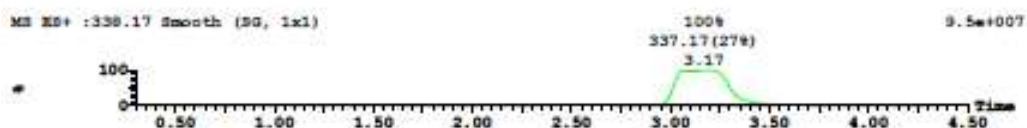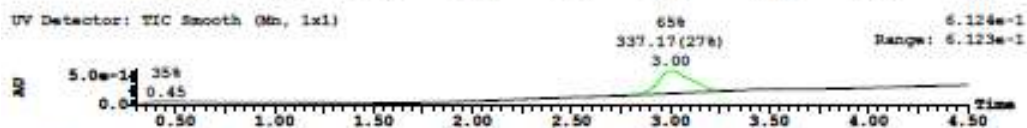

| Peak Number | Compound | Time | AreaAbs | Area %Total | Width | Height | Mass Found |
|-------------|----------|------|---------|-------------|-------|--------|------------|
| 1           |          | 0.45 | 4e+004  | 34.74       | 1     | 7e+004 |            |
| 2           | Found    | 3.00 | 8e+004  | 65.26       | 1     | 4e+005 | 337.17     |

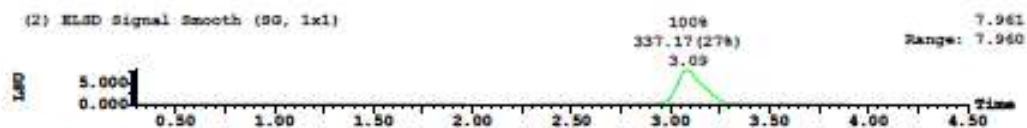

| Peak Number | Compound | Time | AreaAbs | Area %Total | Width | Height | Mass Found |
|-------------|----------|------|---------|-------------|-------|--------|------------|
| 2           | Found    | 3.09 | 1e+003  | 100.00      | 1     | 8e+003 | 337.17     |

Peak ID Compound Time Mass Found  
2 Found 3.10 337.17  
SAMPLE: S,1:3,D 2:(Time: 3.17)Combine (185:191-(152:154+222:224)) 1:MS ES+  
9.2e+007

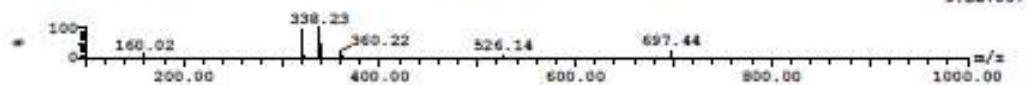

## Characterization of Randomly Selected Library Members

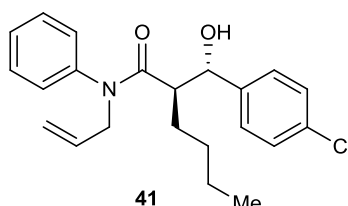

### **(*RS*)-*N*-allyl-2-((*SR*)-(4-chlorophenyl)(hydroxy)methyl)-*N*-phenylhexanamide (*anti*-41).**

Following the standard procedure for the synthesis of library compounds, *anti*-41 was obtained as a white solid.  $^1\text{H}$  NMR (500 MHz,  $\text{CD}_3\text{CN}$ , 320 K)  $\delta$  7.39-7.31 (m, 5H), 7.15 (d,  $J = 8.5$  Hz, 2H); 6.88-6.72 (m, 2H), 5.80-5.69 (m, 1H), 5.04 (dd,  $J = 10.0, 1.5$  Hz, 1H), 5.00 (dd,  $J = 17.0, 1.5$  Hz, 1H), 4.77 (d,  $J = 7.0$  Hz, 1H), 4.65-4.61 (m, 1H), 4.34-4.29 (m, 1H), 4.13-4.08 (m, 1H) 2.55-2.51 (m, 1H), 1.71-1.63 (m, 1H), 1.45-1.37 (m, 1H), 1.22-1.08 (m, 4H), 0.80 (t,  $J = 7.0$  Hz, 3H)  $^{13}\text{C}$  NMR (125 MHz,  $\text{CD}_3\text{CN}$ )  $\delta$  175.3, 144.2, 142.8, 134.3, 133.5, 130.3, 129.8, 129.2, 129.0, 129.0, 118.1, 75.3, 52.7, 49.1, 31.2, 30.0, 23.3, 14.1

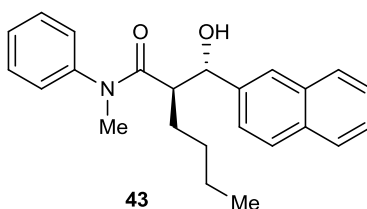

### **(*RS*)-2-((*SR*)-hydroxy(naphthalen-2-yl)methyl)-*N*-methyl-*N*-phenylhexanamide (*anti*-43).**

Following the standard procedure for the synthesis of library compounds, *anti*-43 was obtained as a white solid.  $^1\text{H}$  NMR (500 MHz,  $\text{CD}_3\text{CN}$ , 320 K)  $\delta$  7.92-7.88 (m, 1H), 7.86-7.82 (m, 2H), 7.66 (s, 1H), 7.55-7.48 (m, 2H), 7.31-7.21 (m, 4H), 6.75-6.68 (m, 2H), 4.82-4.78 (m, 2H), 3.10 (s, 3H), 2.74-2.69 (m, 1H), 1.74-1.67 (m, 1H), 1.45-1.38 (m, 1H), 1.22-1.05 (m, 4H), 0.79 (t,  $J = 7.0$  Hz, 3H);  $^{13}\text{C}$  NMR (125 MHz,  $\text{CD}_3\text{CN}$ )  $\delta$  175.6, 144.5, 142.9, 134.2, 133.9, 130.3, 128.9, 128.8, 128.8, 128.7, 128.6, 127.3, 126.9, 126.0, 125.4, 76.2, 49.0, 37.4, 31.3, 30.1, 12.3, 14.2.

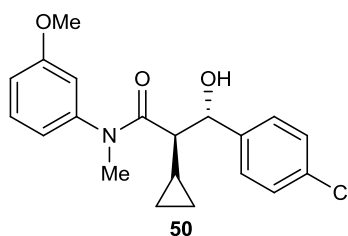

### **(*2RS,3SR*)-3-(4-chlorophenyl)-2-cyclopropyl-3-hydroxy-*N*-(3-methoxyphenyl)-*N*-methylpropanamide (*anti*-50).**

Following the standard procedure for the synthesis of library compounds, *anti*-50 was obtained as a white solid.  $^1\text{H}$  NMR (500 MHz,  $\text{CD}_3\text{CN}$ , 330 K)  $\delta$  7.32 (d,  $J = 8.5$  Hz, 2H), 7.23 (t,  $J = 8.5$  Hz, 1H), 7.18 (d,  $J = 7.5$  Hz, 2H), 6.87 (dd,  $J = 8.0, 2.5$  Hz, 1H), 6.47-6.37 (m, 2H), 4.83-4.75 (m, 2H), 3.76 (s, 3H), 3.14 (s, 3H), 2.00-1.95 (m, 1H), 1.13-1.06 (m, 1H), 0.44-0.39 (m, 1H), 0.37-0.28 (m, 1H), 0.09-0.00 (m, 1H), -0.21- -0.31 (m, 1H);  $^{13}\text{C}$

NMR (125 MHz, CD<sub>3</sub>CN)  $\delta$  174.8, 161.3, 145.4, 144.3, 133.4, 131.1, 129.1, 129.0, 120.8, 114.5, 114.4, 76.3, 56.1, 53.4, 37.4, 13.0, 4.7, 4.1.

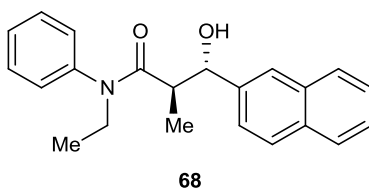

**(2RS,3SR)-N-ethyl-3-hydroxy-2-methyl-3-(naphthalen-2-yl)-N-phenylpropanamide (*anti*-68).** Following the standard procedure for the synthesis of library compounds, *anti*-68 was obtained as a white solid. <sup>1</sup>H NMR (500 MHz, CD<sub>3</sub>CN, 320 K)  $\delta$  7.91-7.87 (m, 1H), 7.85-7.81 (m, 2H), 7.67 (s, 1H), 7.53-7.47 (m, 2H), 7.35-7.24 (m, 4H), 6.79-6.63 (m, 2H), 4.83 (d, *J* = 7.0 Hz, 1H), 4.76-4.71 (m, 1H), 3.64 (dq, *J* = 14.0, 7.0 Hz, 1H), 3.44 (dq, *J* = 14.0, 7.0 Hz, 1H), 2.69-2.62 (m, 1H), 1.09 (d, *J* = 7.0 Hz, 3H), 0.93 (t, *J* = 7.0 Hz, 3H); <sup>13</sup>C NMR (125 MHz, CD<sub>3</sub>CN)  $\delta$  175.8, 142.9, 142.7, 134.2, 133.9, 130.4, 129.4, 129.0, 128.8, 128.8, 128.6, 127.2, 126.8, 125.8, 125.4, 77.5, 44.5, 43.9, 16.2, 13.2.

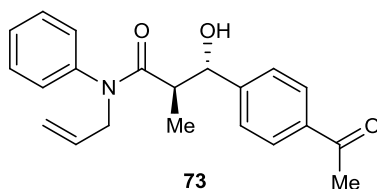

**(2RS,3SR)-3-(4-acetylphenyl)-N-allyl-3-hydroxy-2-methyl-N-phenylpropanamide (*anti*-73).** Following the standard procedure for the synthesis of library compounds, *anti*-73 was obtained as a white solid. <sup>1</sup>H NMR (500 MHz, CD<sub>3</sub>CN, 320 K)  $\delta$  7.91 (d, *J* = 8.5 Hz, 2H), 7.39-7.35 (m, 3H), 7.28 (d, *J* = 8.0 Hz, 2H), 6.92-6.84 (m, 2H), 5.78-5.69 (m, 1H), 5.06-4.96 (m, 2H), 4.69-4.63 (m, 2H), 4.24 (dd, *J* = 15.0, 6.0 Hz, 1H), 4.14 (dd, *J* = 15.0, 6.5 Hz, 1H), 2.69-2.61 (m, 1H), 2.57 (s, 3H), 1.08 (d, *J* = 7.0 Hz, 3H); <sup>13</sup>C NMR (125 MHz, CD<sub>3</sub>CN)  $\delta$  198.7, 175.8, 150.3, 142.9, 137.4, 134.3, 130.5, 129.4, 129.2, 129.1, 127.4, 117.9, 76.9, 52.5, 43.8, 27.1, 16.1.

## 5. Additional Product Characterization

### X-Ray Structure Determination of 5

#### Data Collection

An irregular broken fragment (0.32 x 0.28 x 0.24 mm) was selected under a stereomicroscope while immersed in Fluorolube oil to avoid possible reaction with air. The crystal was removed from the oil using a tapered glass fiber that also served to hold the crystal for data collection. The crystal was mounted and centered on a Bruker SMART APEX system at 100 K. Rotation and still images showed the diffractions to be sharp. Frames separated in reciprocal space were obtained and provided an orientation matrix and initial cell parameters. Final cell parameters were obtained from the full data set.

A “full sphere” data set was obtained which samples approximately all of reciprocal space to a resolution of 0.75 Å using 0.3° steps in  $\omega$  using 10 second integration times for each frame. Data was collected at 200 K. Cooling to 100 K resulted in crystal decomposition possibly due to a phase transition. Integration of intensities and refinement of cell parameters were done using SAINT. Absorption corrections were applied using SADABS based on redundant diffractions.<sup>6</sup>

### Structure solution and refinement

The space group was determined as P1(bar) based on systematic absences and intensity statistics. Direct methods were used to locate all most C atoms from the E-map. Repeated difference Fourier maps allowed recognition of all expected C, N, O and F atoms. Following anisotropic refinement of all non-H atoms, ideal H-atom positions were calculated. The CF<sub>3</sub> group was disordered into two orientations with occupancies of 0.84 and 0.16, and they were refined as such. Final refinement was anisotropic for all non-H atoms, and isotropic-riding for H atoms. No other anomalous bond lengths or thermal parameters were noted. All ORTEP diagrams have been drawn with 50% probability ellipsoids. Further information is contained in the CIF file.

### Equations of interest:

$$R_{\text{int}} = \frac{\sum |F_o^2 - \langle F_o^2 \rangle|}{\sum |F_o^2|}$$

$$wR2 = \left[ \frac{\sum [w (F_o^2 - F_c^2)^2]}{\sum [w (F_o^2)^2]} \right]^{1/2}$$

$$R1 = \frac{\sum ||F_o| - |F_c||}{\sum |F_o|}$$

$$\text{Goof} = S = \frac{[\sum [w (F_o^2 - F_c^2)^2]]^{1/2}}{(n-p)^{1/2}}$$

where:  $w = q / \sigma^2 (F_o^2) + (aP)^2 + bP$ ;       $n = \text{number of independent reflections};$   
 $q, a, b, P$  as defined in [5]       $p = \text{number of parameters refined.}$

---

<sup>6</sup> All software and sources of scattering factors are contained in the SHELXTL (version 5.1) program library (G. Sheldrick, Bruker Analytical X-ray Systems, Madison, WI).



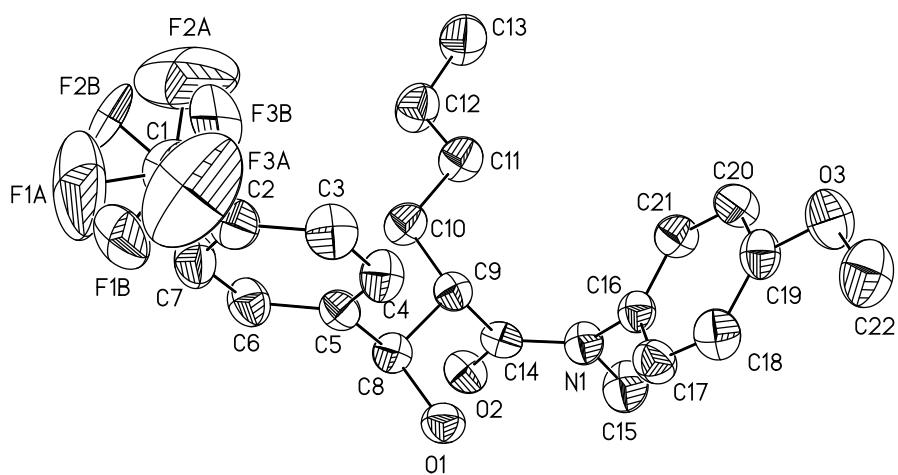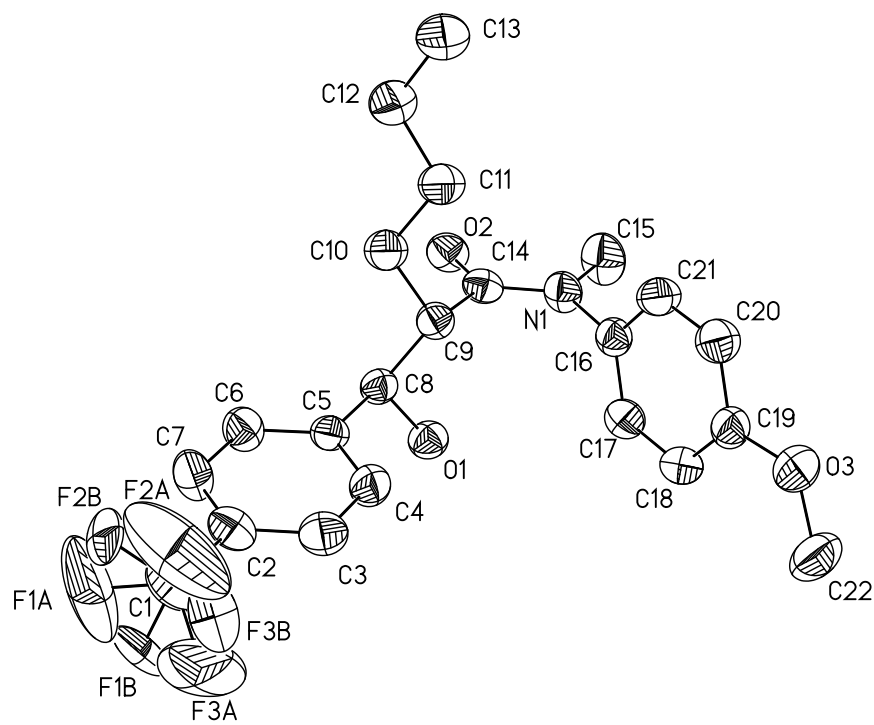

**Supplementary Figure S3. Crystal structure of compound 5.** Both orientations of the CF<sub>3</sub> group are shown.

**Supplementary Table S1. Crystal data and structure refinement for compound 5 (CCDC 810238).**

|                         |                                                                |
|-------------------------|----------------------------------------------------------------|
| Identification Code     | Mont01                                                         |
| CCDC Deposition Number  | CCDC 810238                                                    |
| Empirical formula       | C <sub>22</sub> H <sub>26</sub> F <sub>3</sub> NO <sub>3</sub> |
| Formula weight          | 409.44                                                         |
| Crystallization Solvent | hexanes and ethyl acetate                                      |

**Data Collection**

|                                 |                                                                                                                                 |
|---------------------------------|---------------------------------------------------------------------------------------------------------------------------------|
| Temperature                     | 200 K                                                                                                                           |
| Wavelength                      | 0.71073 Å                                                                                                                       |
| Crystal system                  | Triclinic                                                                                                                       |
| Space Group                     | P1(bar)                                                                                                                         |
| Unit cell dimensions            | $a = 10.305(2)$ Å $\alpha = 63.547(4)$ °<br>$b = 11.201(3)$ Å $\beta = 65.449(4)$ °<br>$c = 11.779(3)$ Å $\gamma = 66.927(4)$ ° |
| Volume                          | 1071.0(4) Å <sup>3</sup>                                                                                                        |
| Z                               | 2                                                                                                                               |
| Density (calculated)            | 1.270 Mg/m <sup>3</sup>                                                                                                         |
| Absorption coefficient          | 0.101 mm <sup>-1</sup>                                                                                                          |
| F(000)                          | 432                                                                                                                             |
| Crystal size, color, habit      | 0.32 x 0.28 x 0.24 mm, clear, fragment                                                                                          |
| Theta range for data collection | 2.02 – 28.37 °                                                                                                                  |
| Index ranges                    | -13 ≤ h ≤ 13, -14 ≤ k ≤ 14, -15 ≤ l ≤ 15                                                                                        |
| Reflections collected           | 13,007                                                                                                                          |

Independent reflections 5,170 ( $R_{\text{int}} = 0.0243$ )

**Supplementary Table S1 (cont.)**

Reflections with  $I > 4\sigma(F_o)$  3,057

Absorption correction SADABS based on redundant diffractions

Max. and min. transmission 1.0, 0.720

**Structure Solution and Refinement**

Refinement method Full-matrix least squares on  $F^2$

Weighting scheme  $w = q [\sigma^2(F_o^2) + (aP)^2 + bP]^{-1}$  where:  
 $P = (F_o^2 + 2F_c^2)/3$ ,  $a = 0.0821$ ,  $b = 0.0$ ,  $q = 1$

Data / restraints / parameters 5170 / 0 / 293

Goodness-of-fit on  $F^2$  0.927

Final R indices [ $I > 2 \text{ sigma}(I)$ ]  $R1 = 0.0586$ ,  $wR2 = 0.1402$

R indices (all data)  $R1 = 0.0981$ ,  $wR2 = 0.1594$

Largest diff. peak and hole 0.311, -0.196  $e\text{\AA}^{-3}$

# NMR Spectra of New Compounds

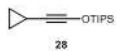

1.26  
 1.22  
 1.20  
 1.23  
 1.23  
 1.23  
 1.21  
 1.20  
 1.10  
 1.06  
 1.06  
 1.03  
 0.61  
 0.61  
 0.60  
 0.60  
 0.58  
 0.58  
 0.58  
 0.52  
 0.52  
 0.45  
 0.45

```

NAME tm-jc-100-2-1h
EXPNO 1
PROCNO 1
Date_ 20110126
Time 10.21
INSTRUM spect
PROBHD 5 mm PABBI 1H/
PULPROG zg
TD 5998
SOLVENT Acetone
NS 8
DS 0
SWH 10000.000 Hz
FIDRES 0.166672 Hz
AQ 2.9999499 se
RG 11.3
DW 50.000 us
DE 7.50 us
TE 294.9 K
D1 5.00000000 se
TD0 1
  
```

```

===== CHANNEL f1 =====
NUC1 1H
P1 5.35 us
PL1 0.00 dB
SFO1 499.8729992 MHz
SI 32768
SF 499.8700180 MHz
WDM EM
SSB 0
LB 0.30 Hz
GB 0
PC 1.00
  
```

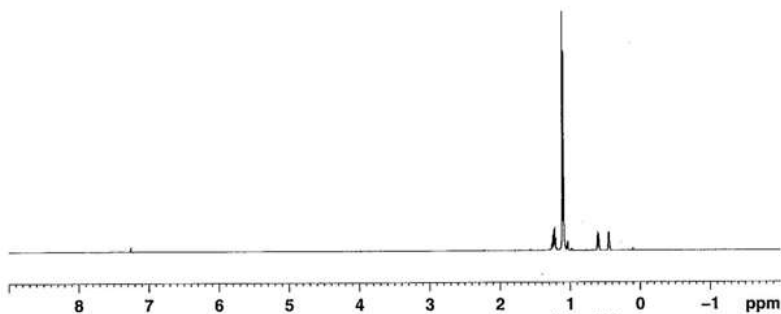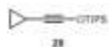

NAME tm-jc-100  
 83.741  
 34.331  
 17.527  
 12.009  
 7.875  
 1.446

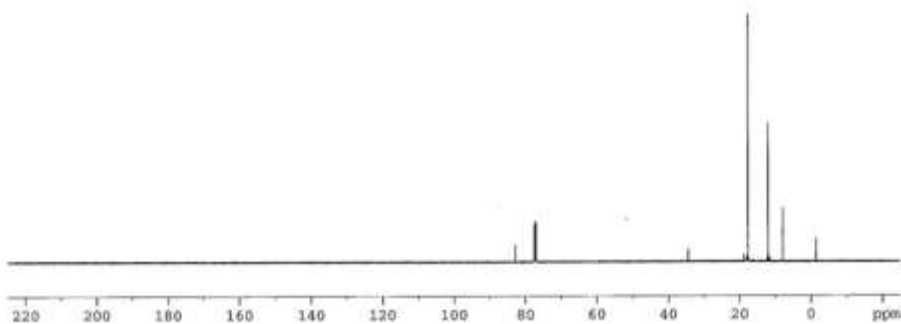

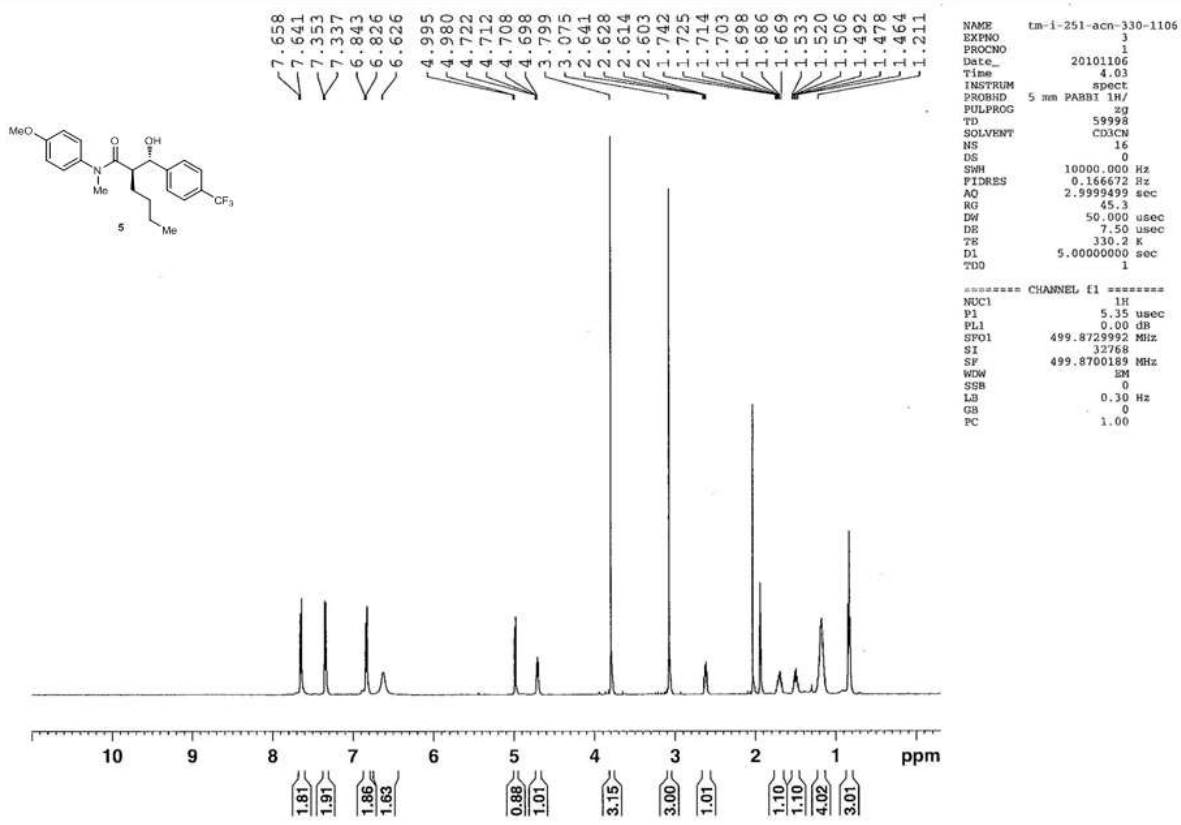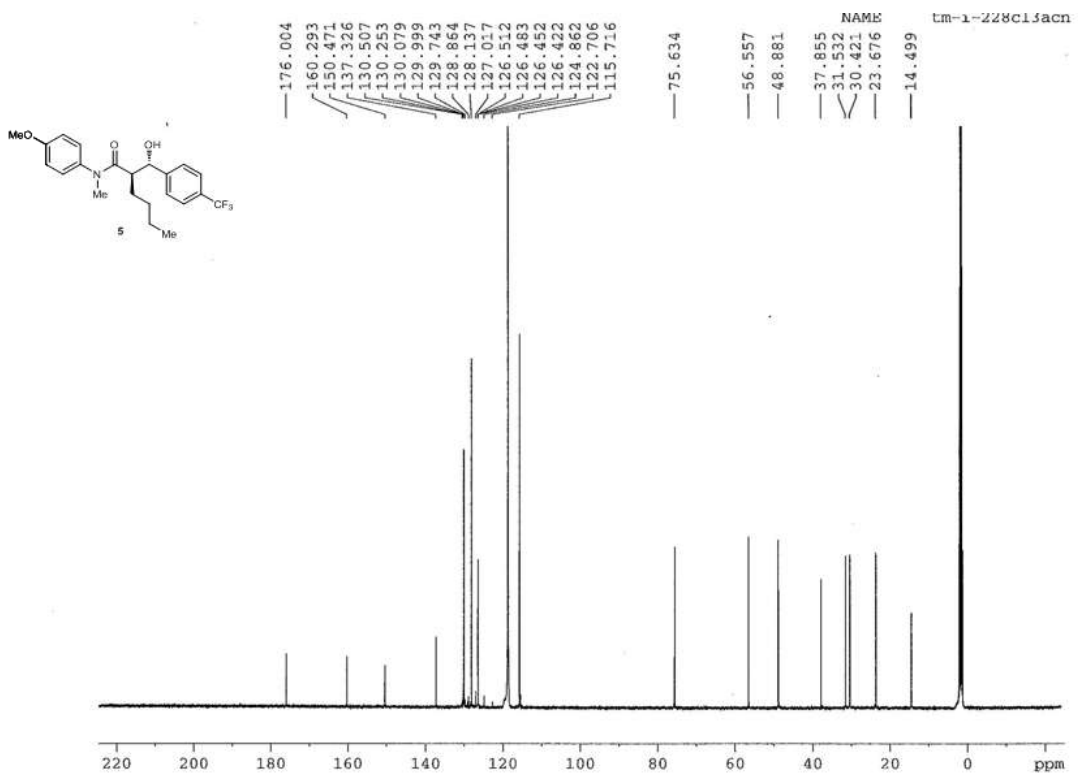

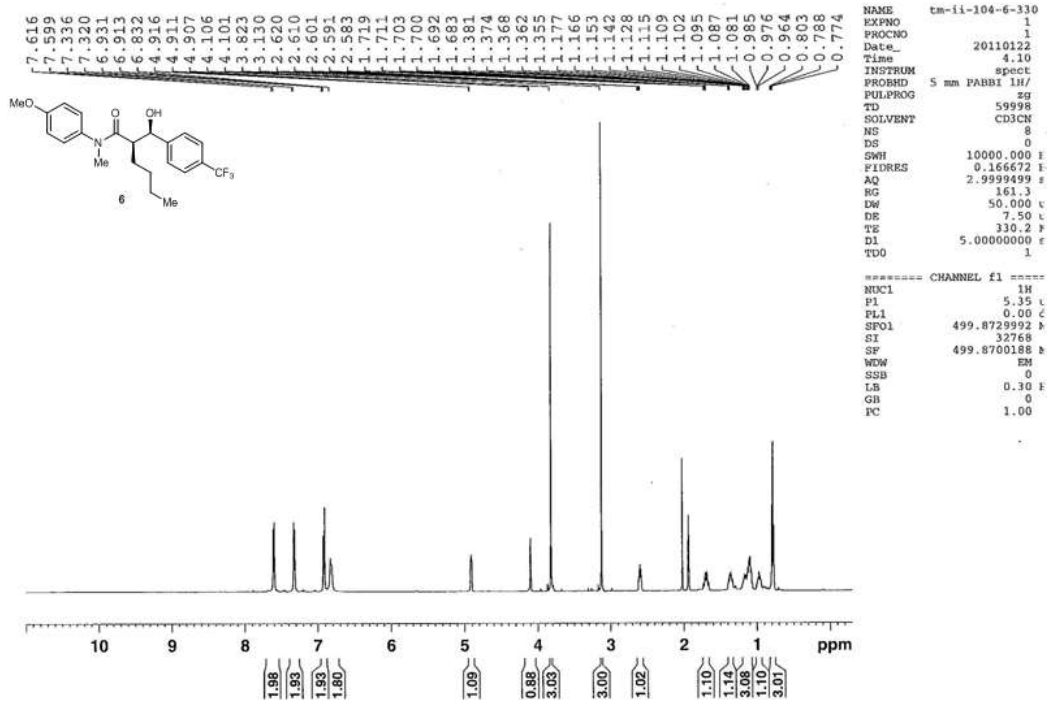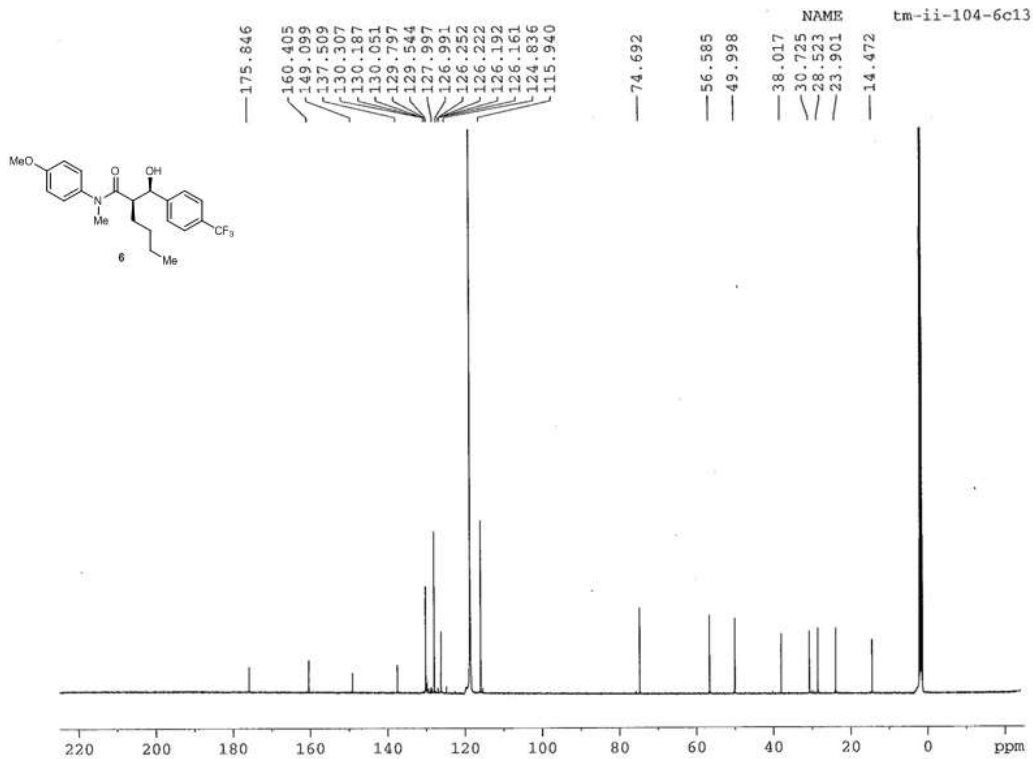

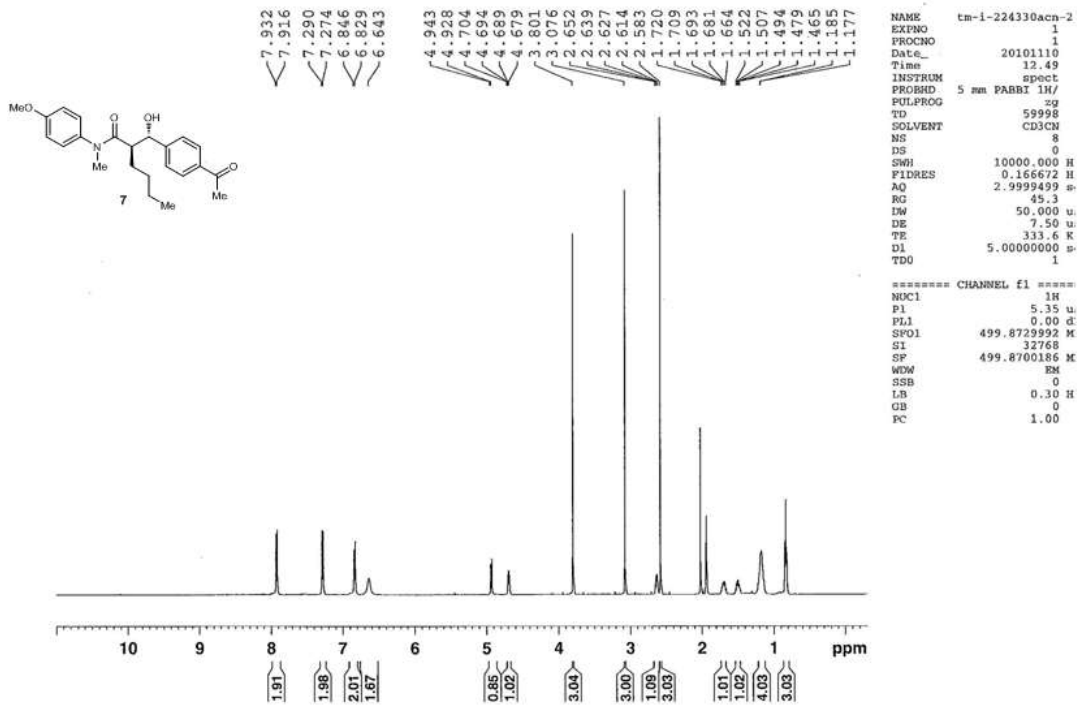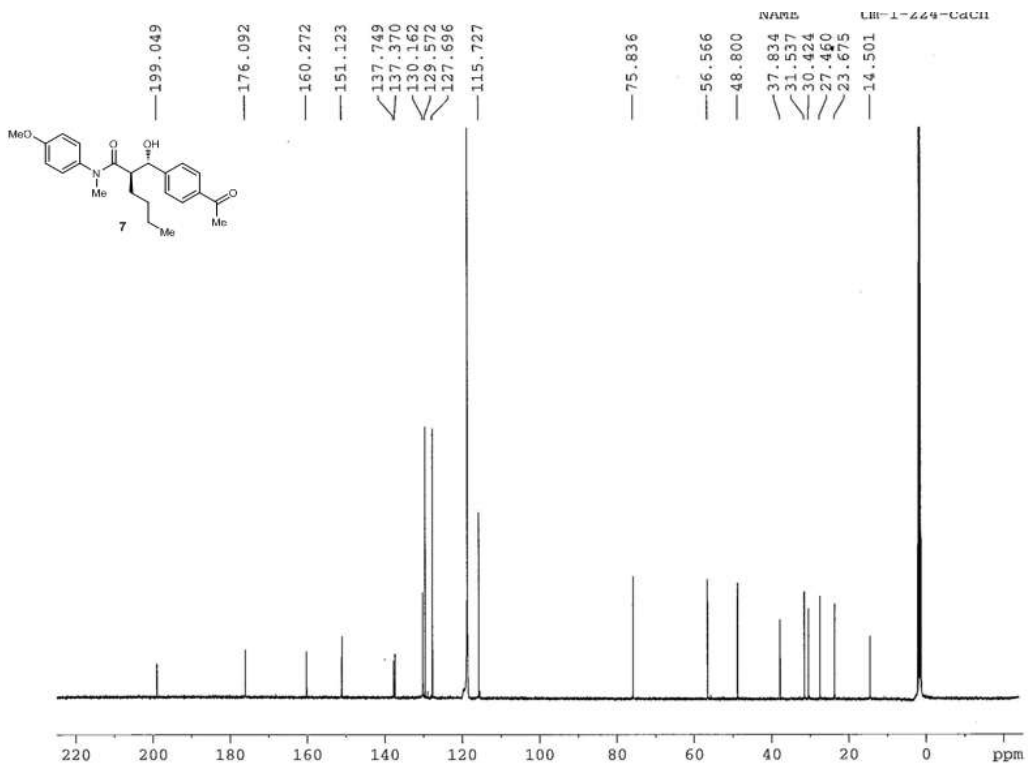

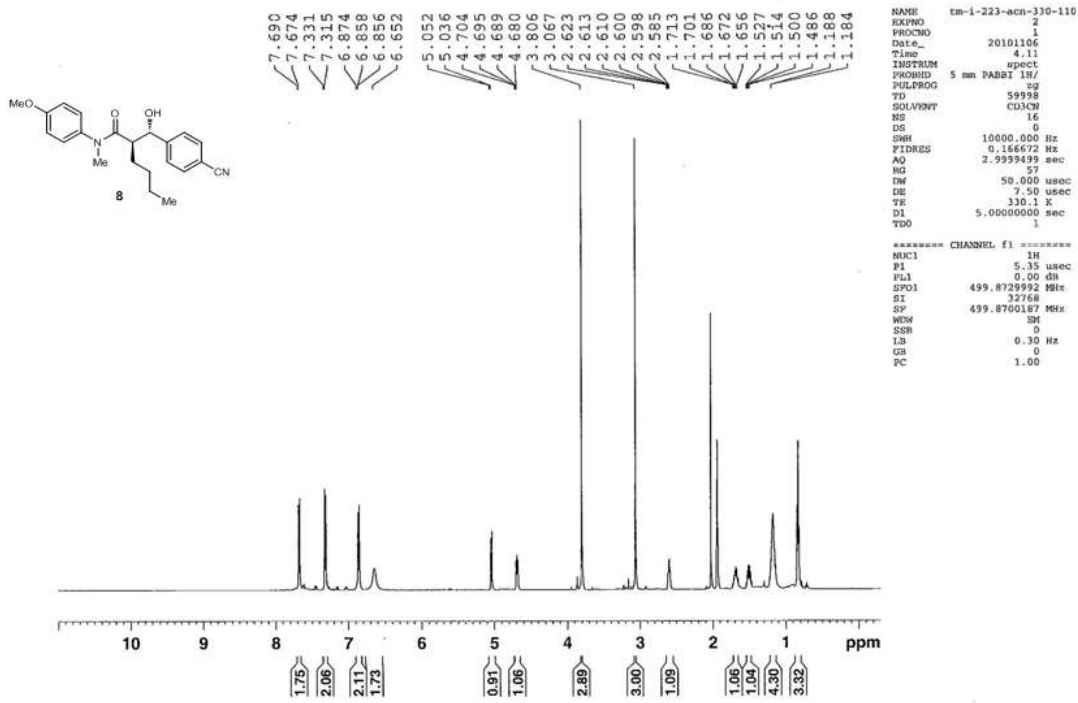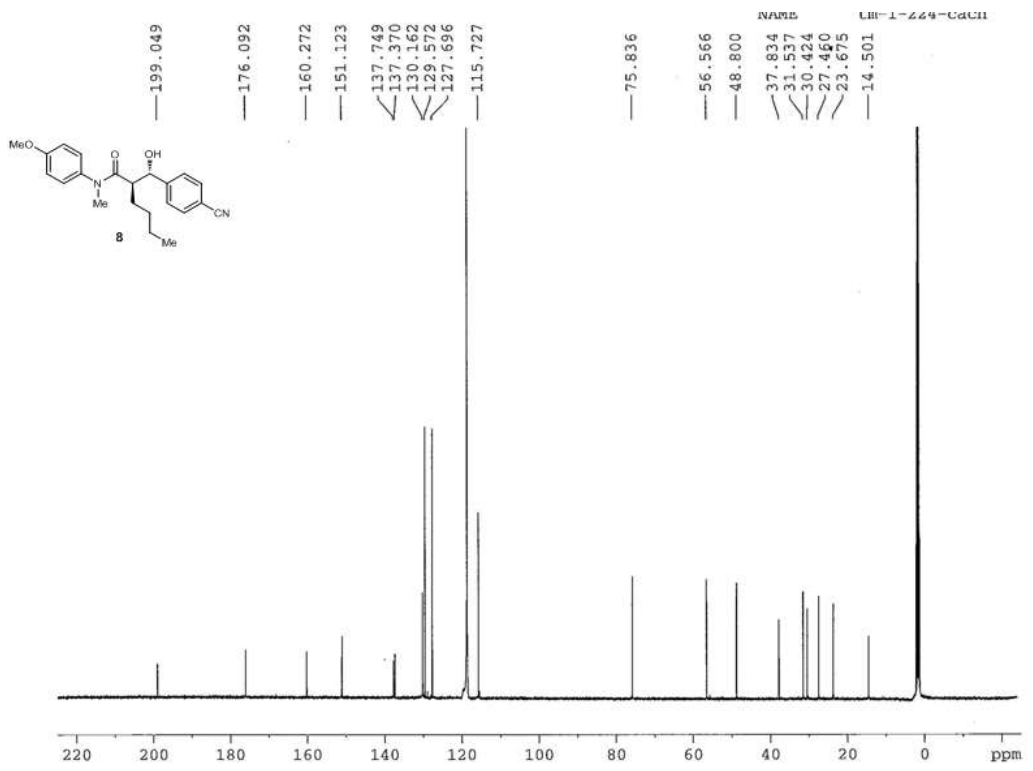



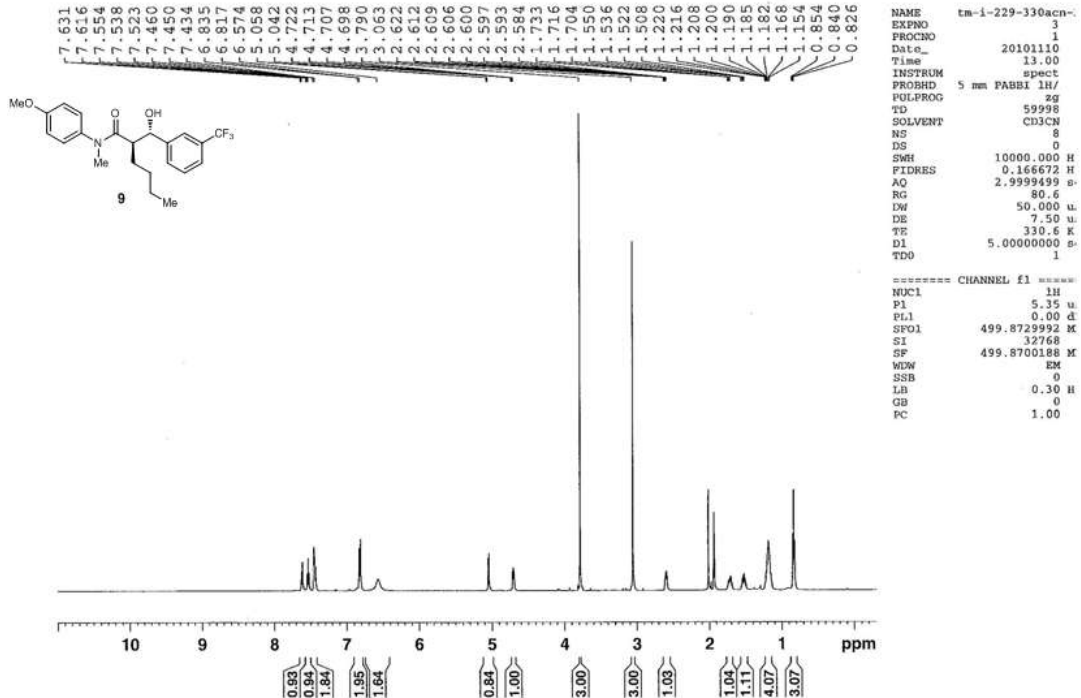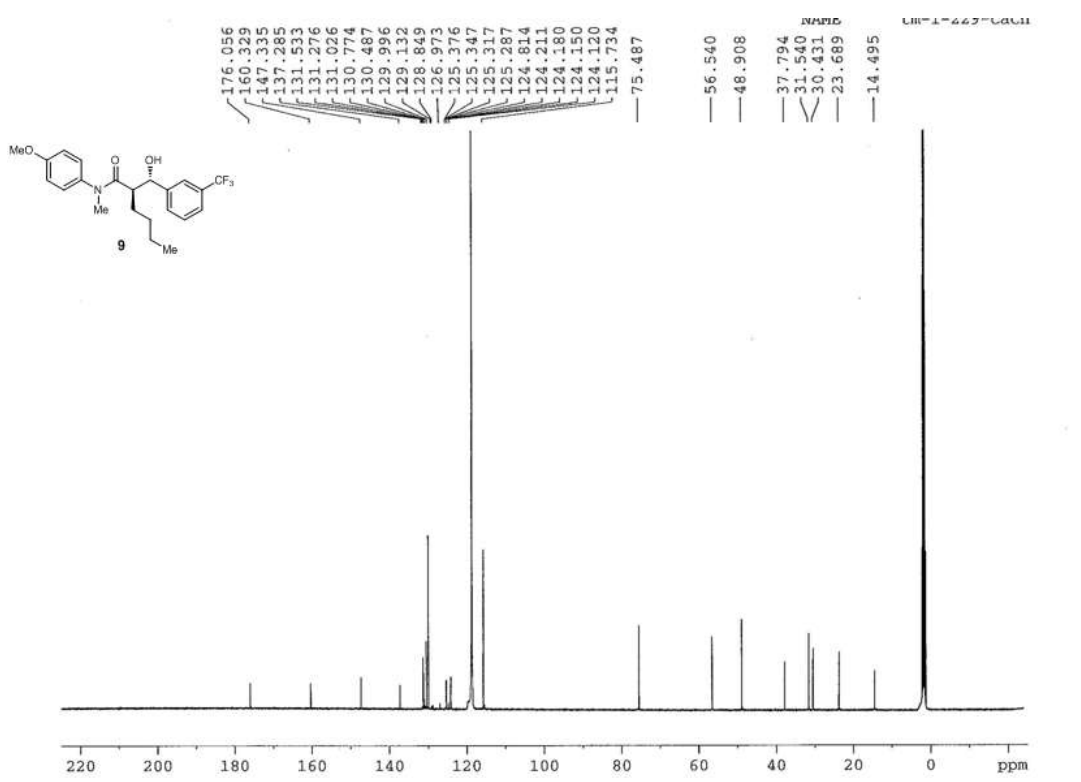

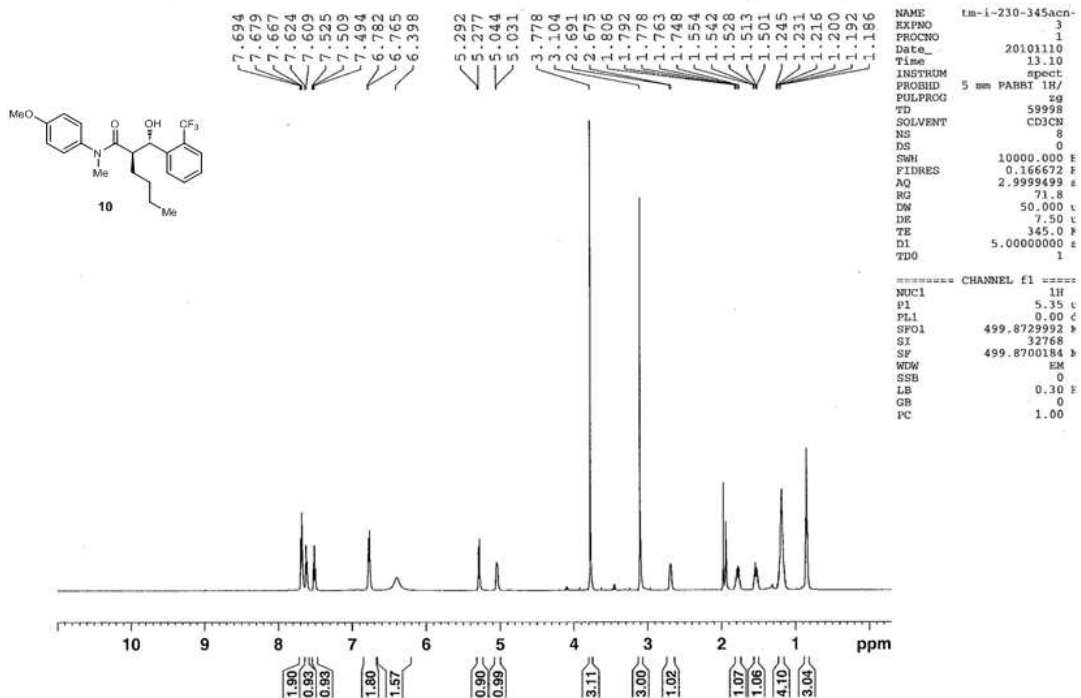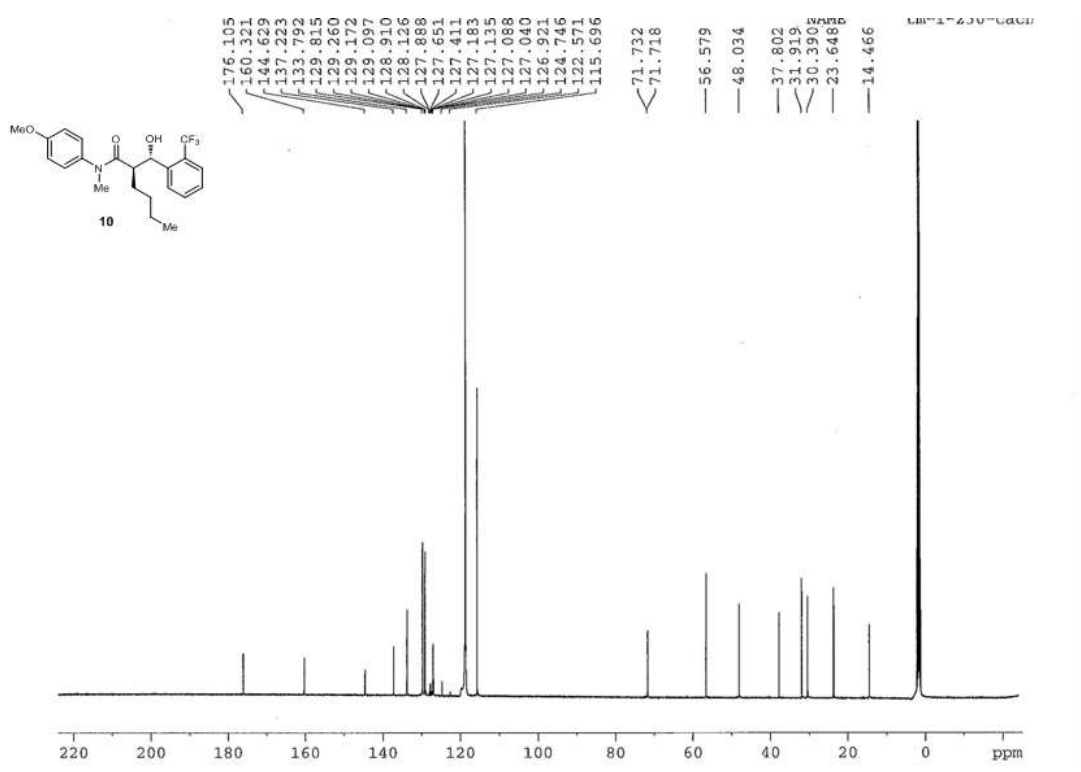

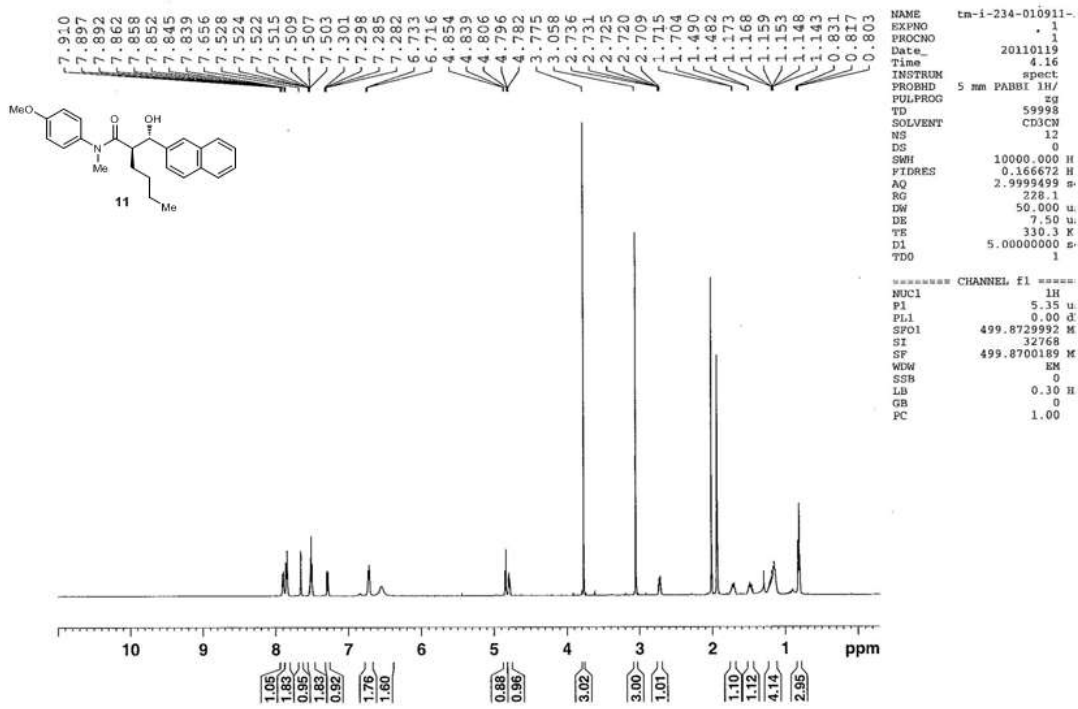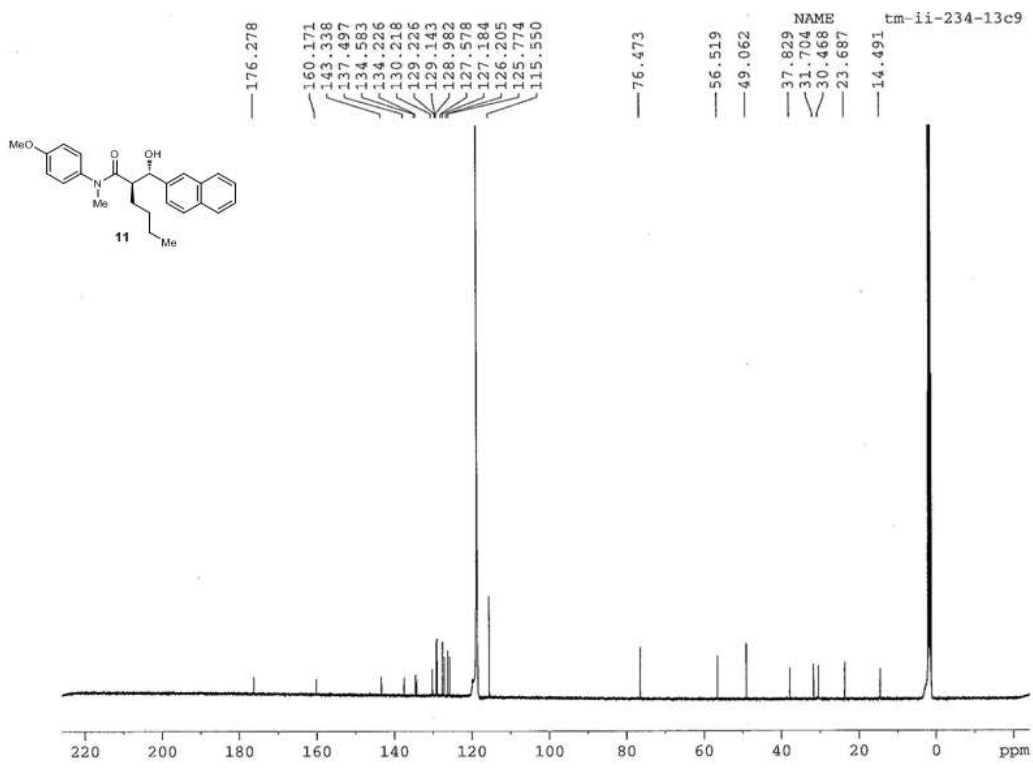

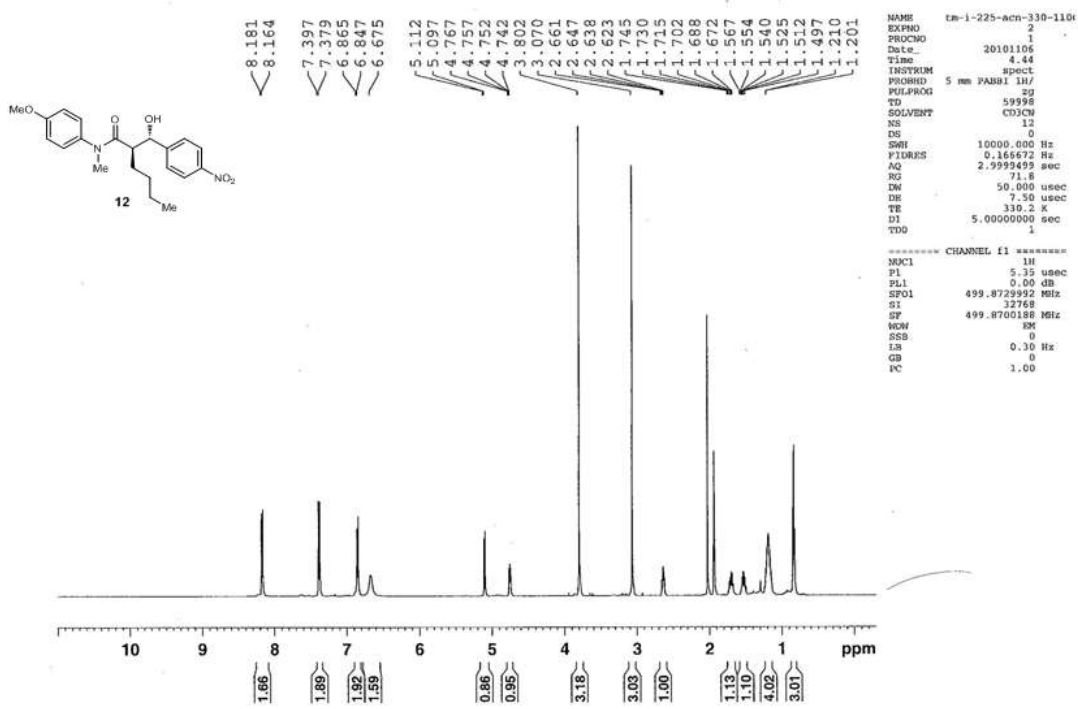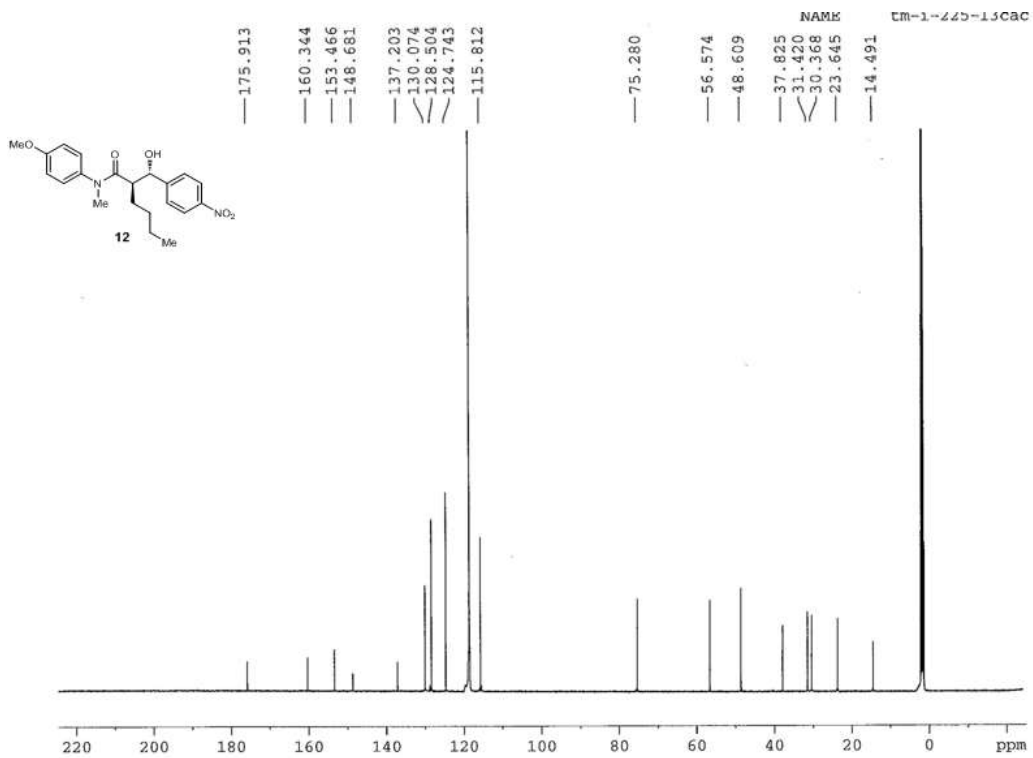

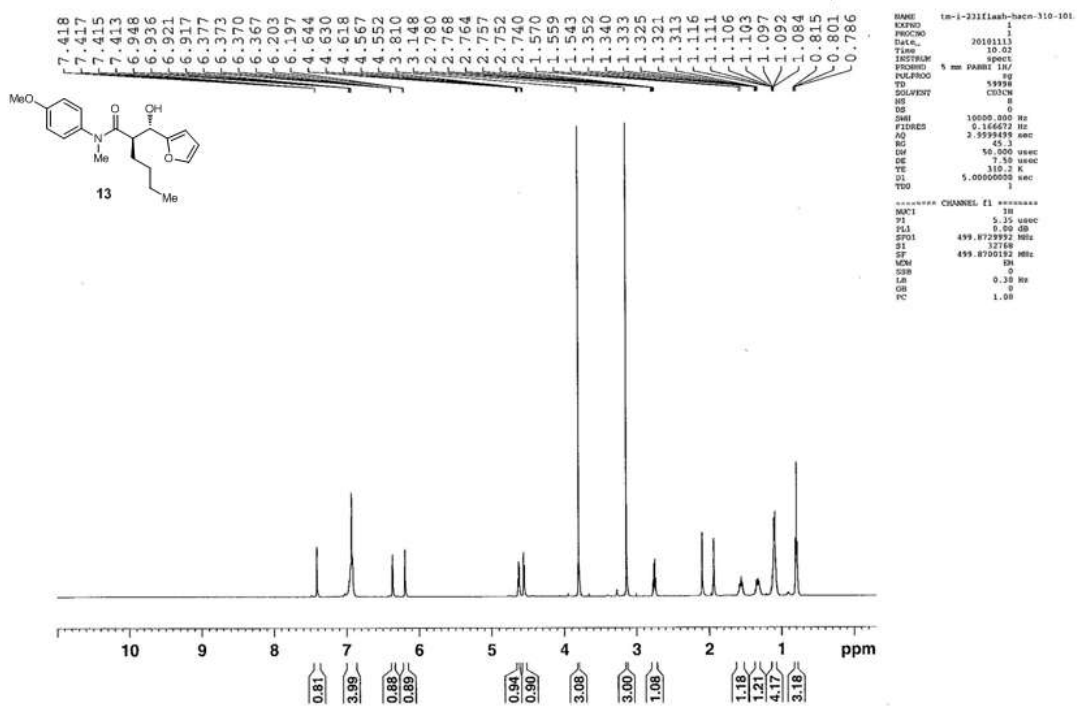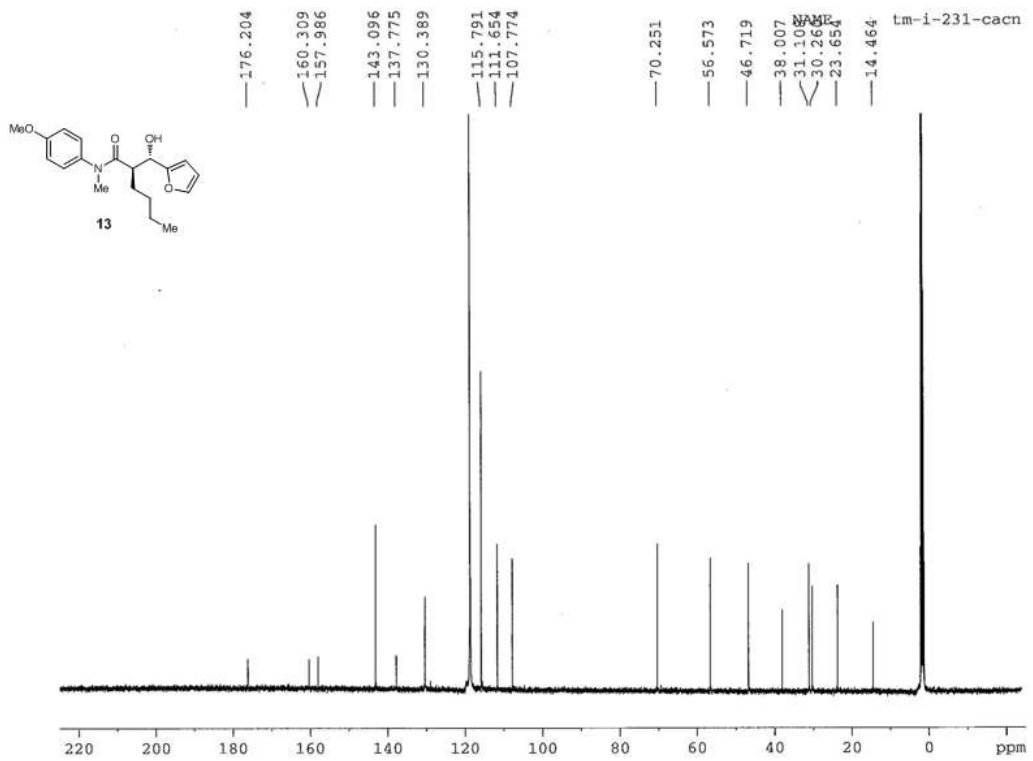

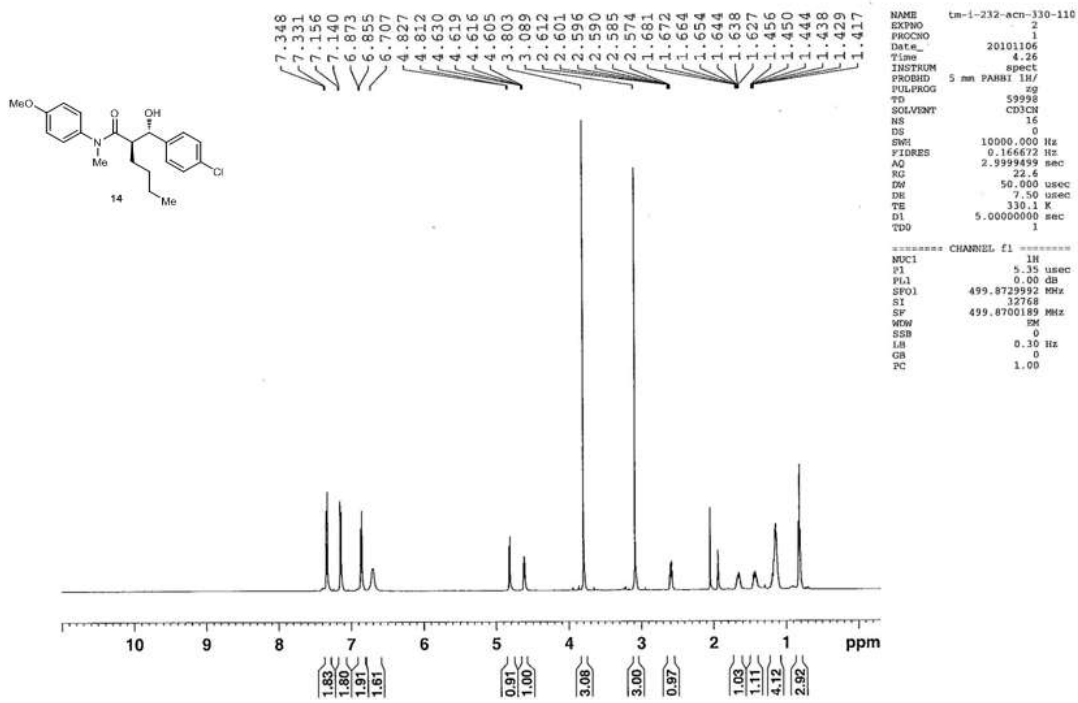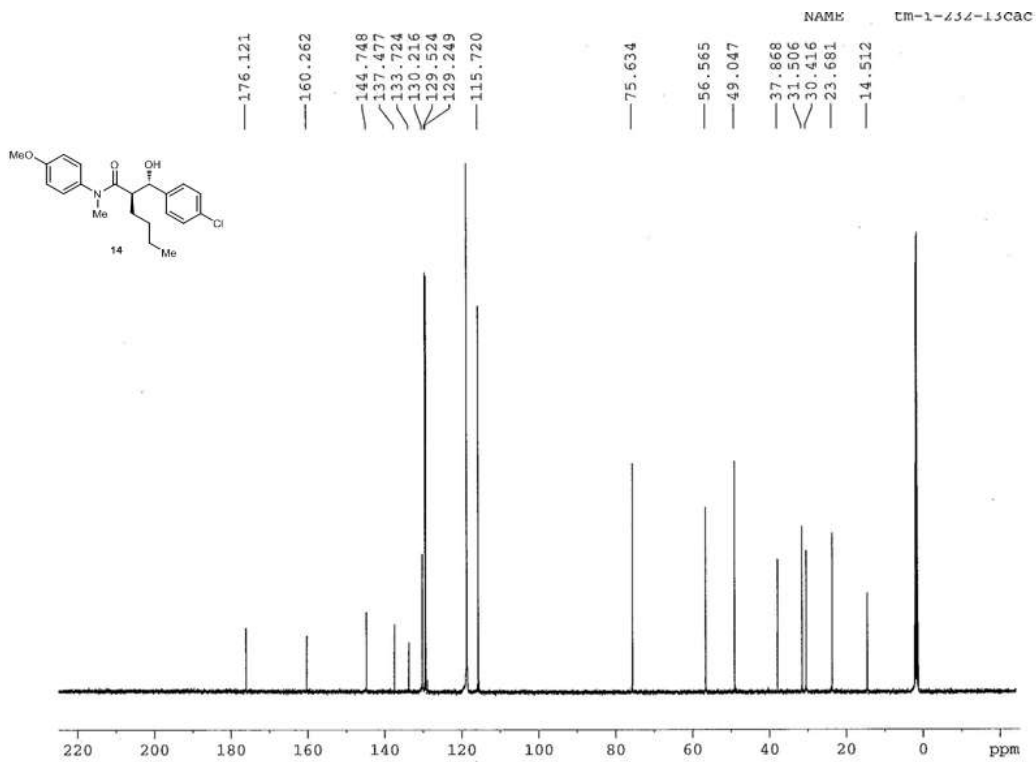

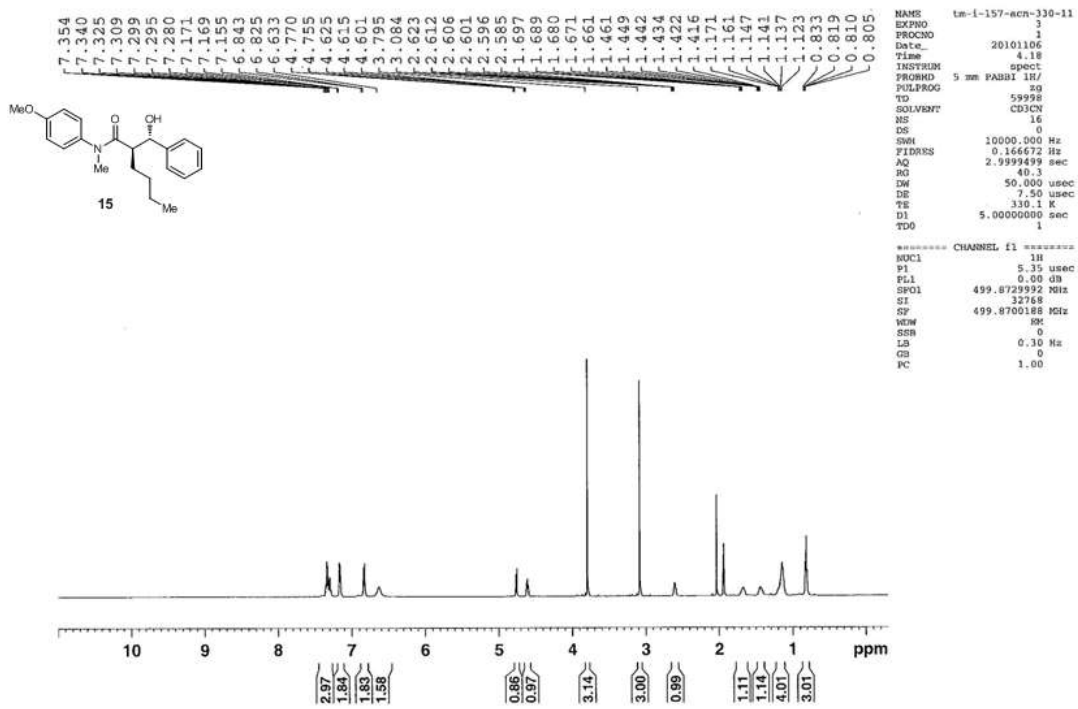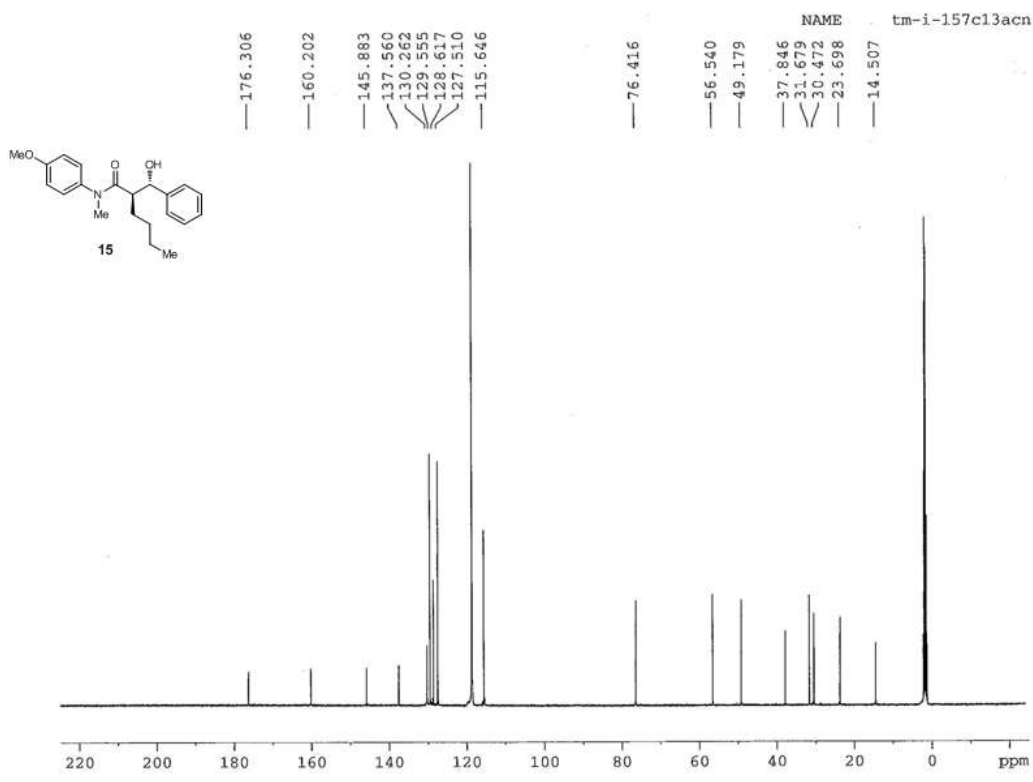

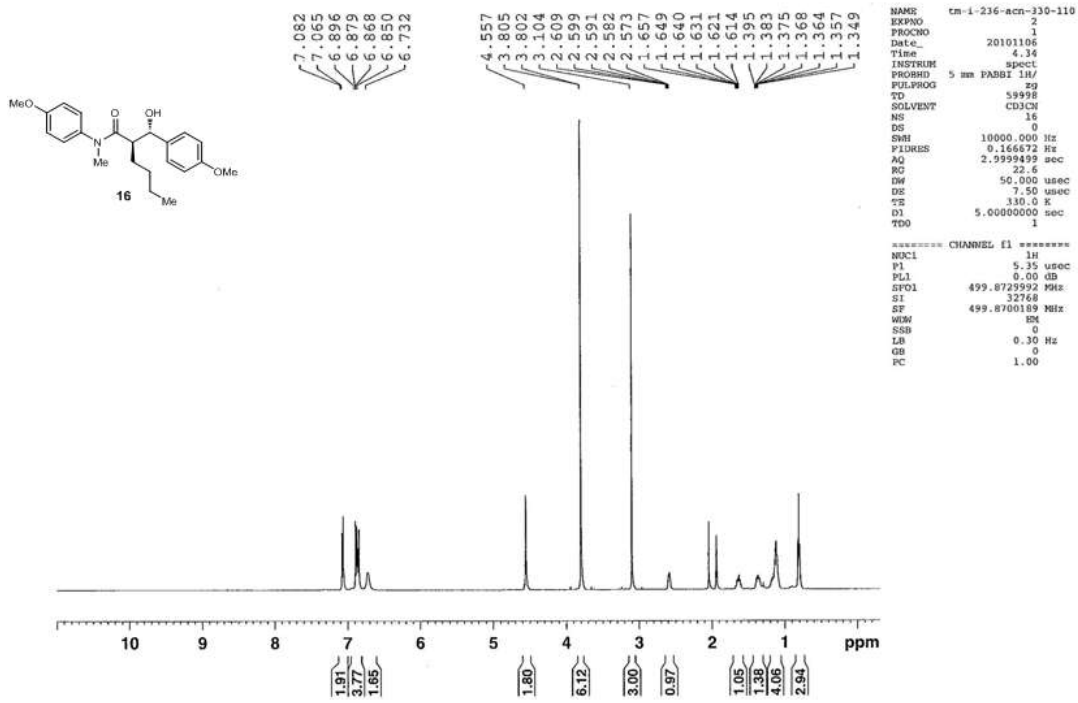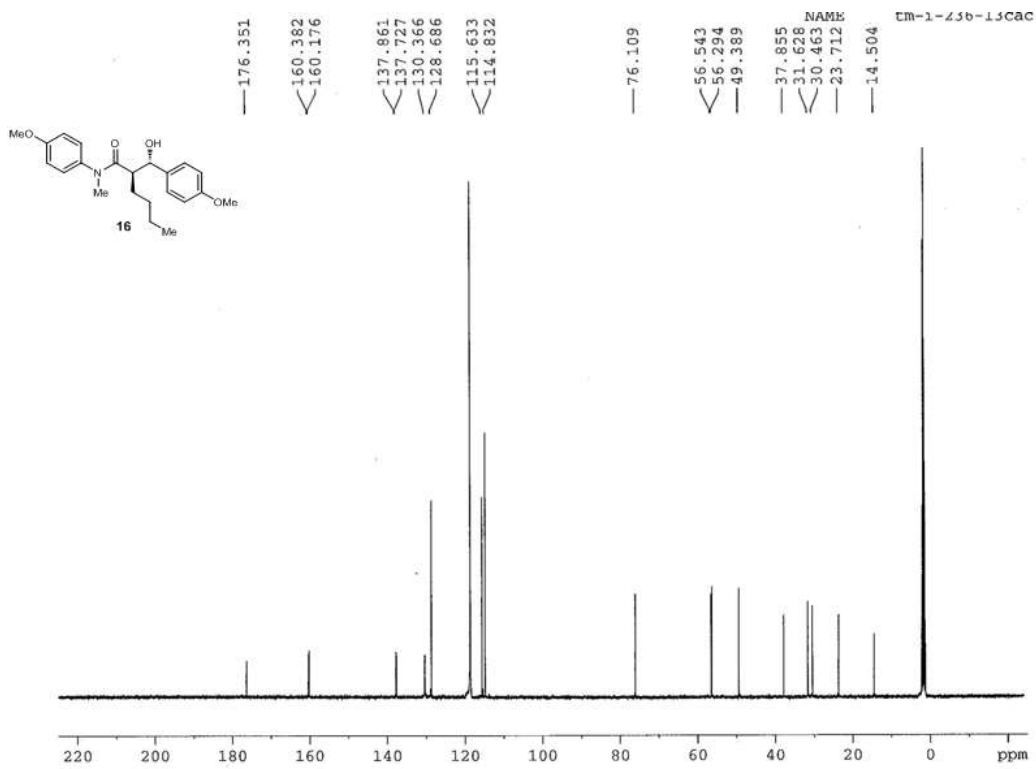



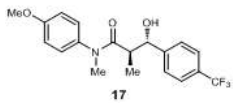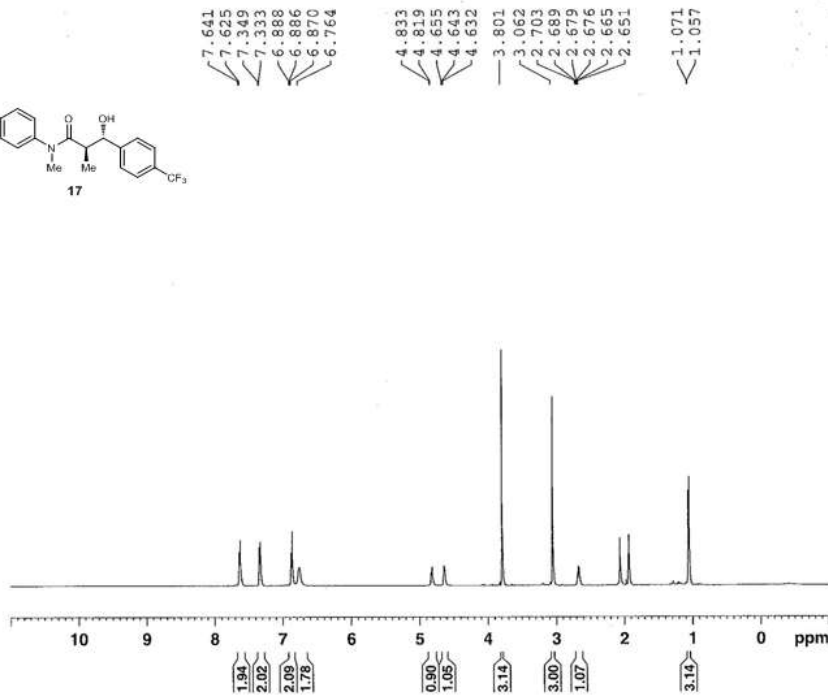

```

NAME          tm-1-281-hcn-315-101
EXPNO         1
PROCNO        1
Date_         20101113
Time          7.29
INSTRUM       spect
PROBHD        5 mm PABBI 1H/
PULPROG       zgpg30
TD            65536
SOLVENT       CDCl3
NS            8
DS            0
SWH           10000.000 Hz
FIDRES        0.166672 Hz
AQ            2.9994499 sec
RG            114
DW            50.000 usec
DE            7.50 usec
TE            316.1 K
D1            5.0000000 sec
TDO           1
===== CHANNEL f1 =====
NUC1          1H
P1            5.35 usec
PL1           0.00 dB
SFO1         499.8729952 MHz
SI            32768
SF           499.8700193 MHz
WDW           EM
SSB           0
LB            0.30 Hz
GB            0
PC            1.00
  
```

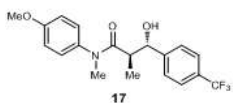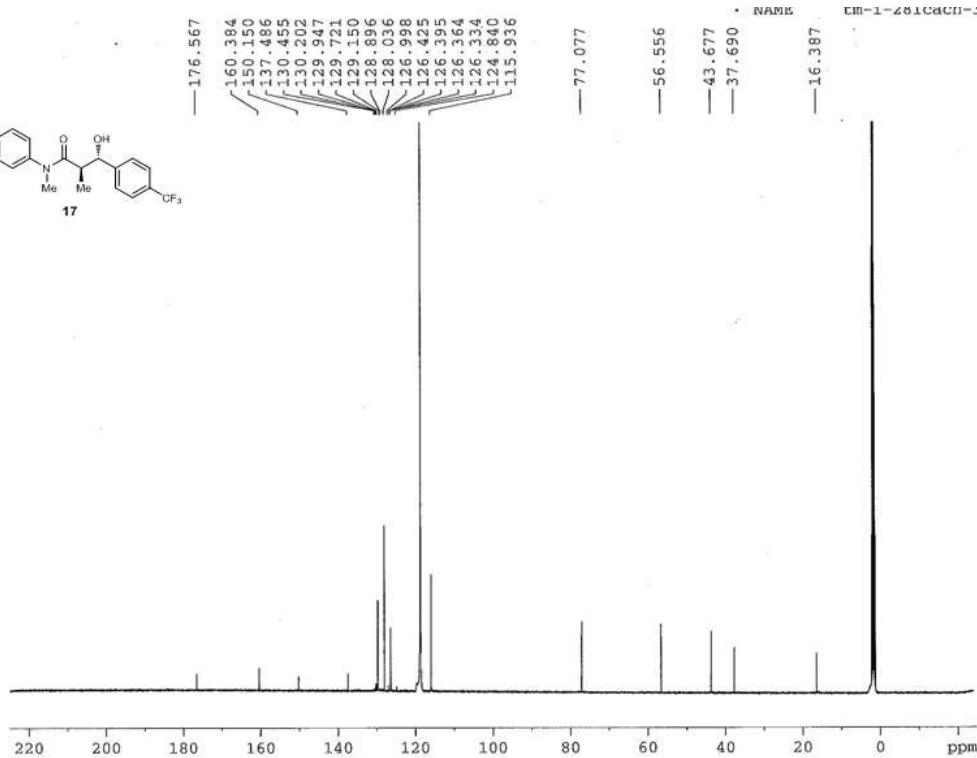

NAME tm-1-281-hcn-315-101

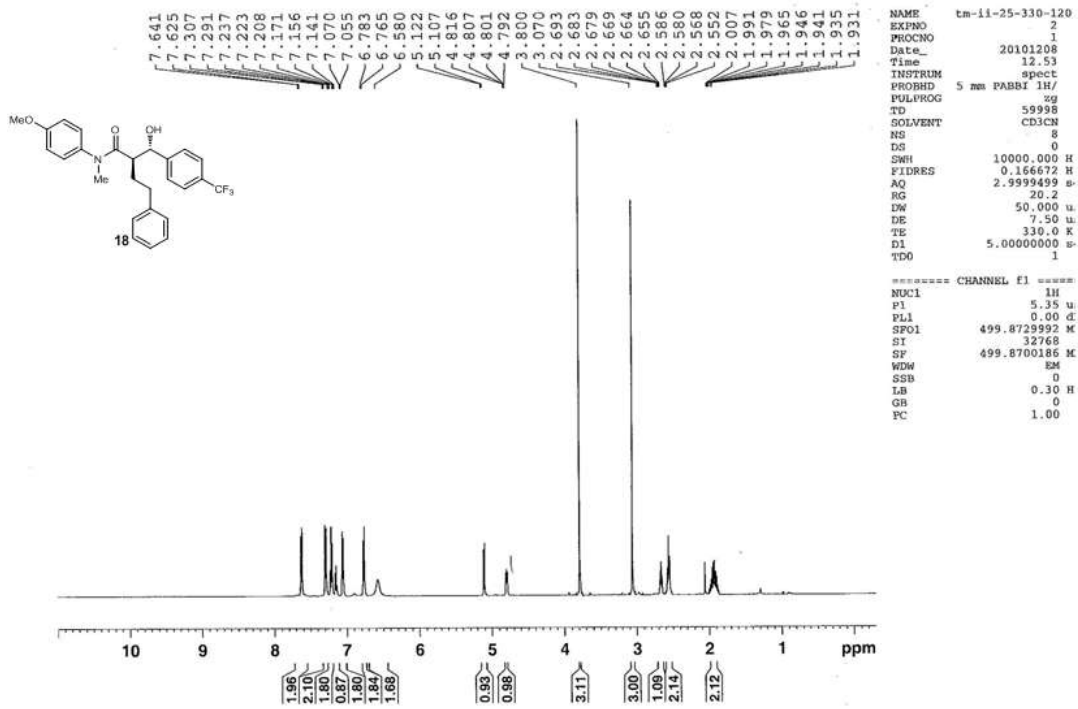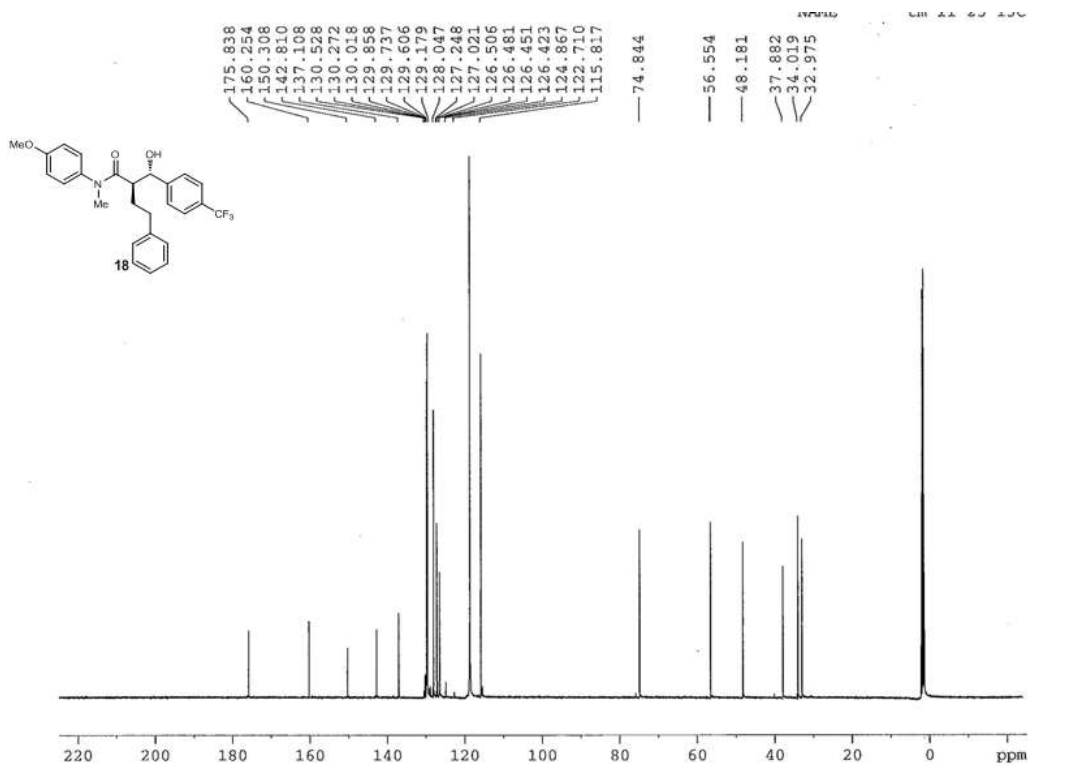

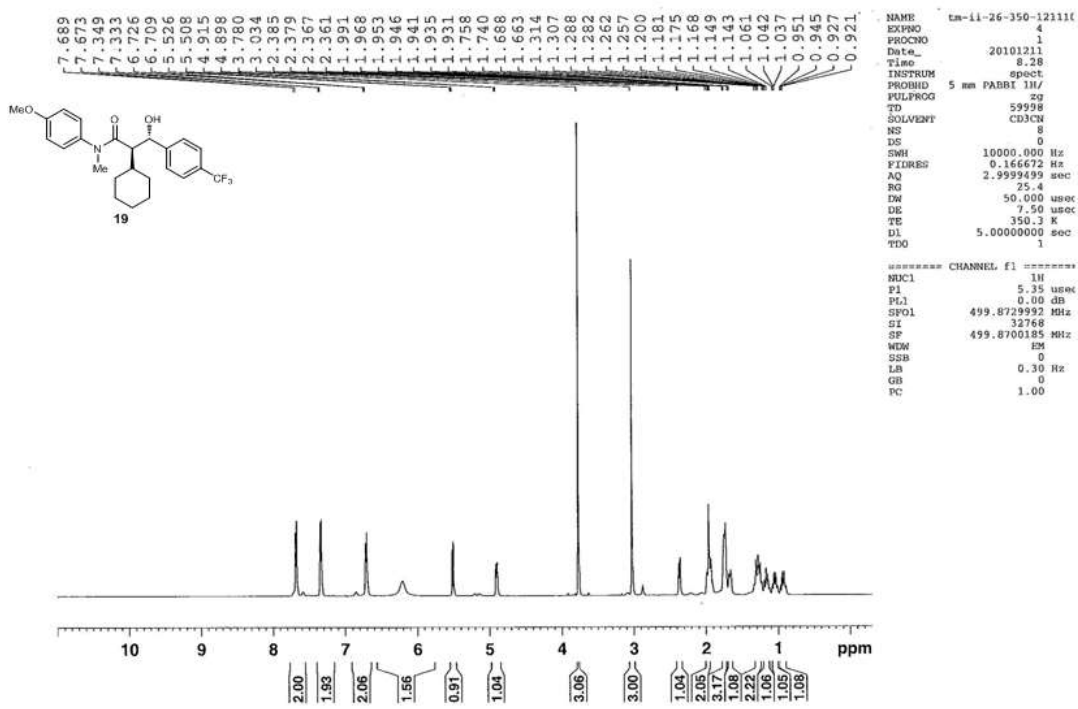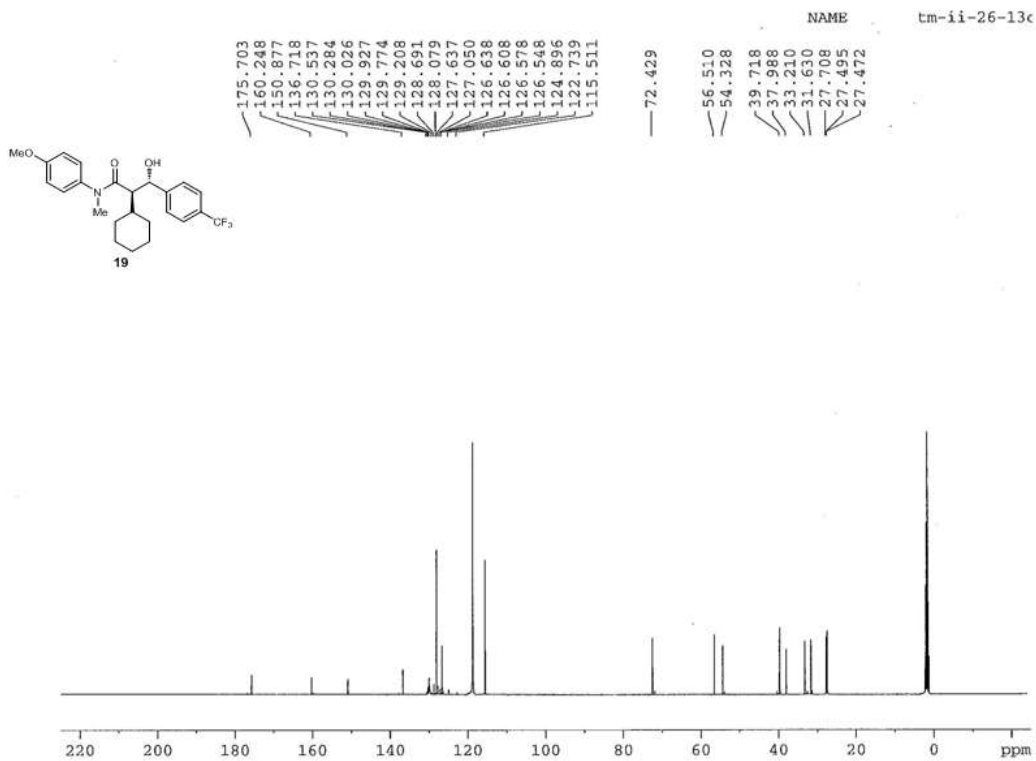

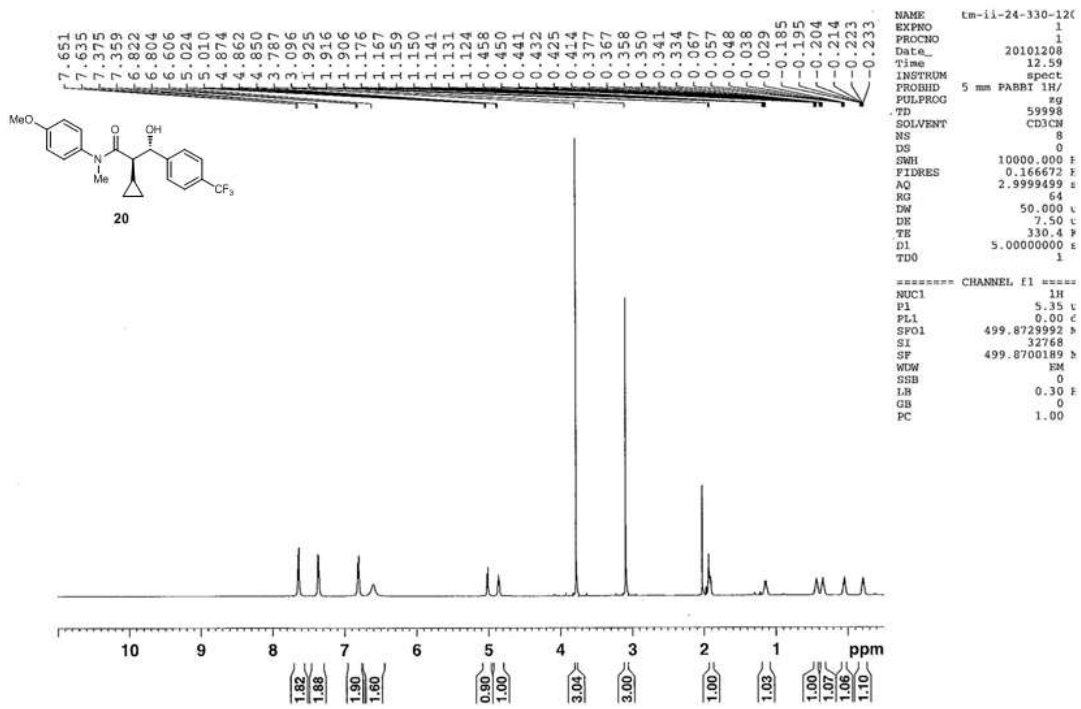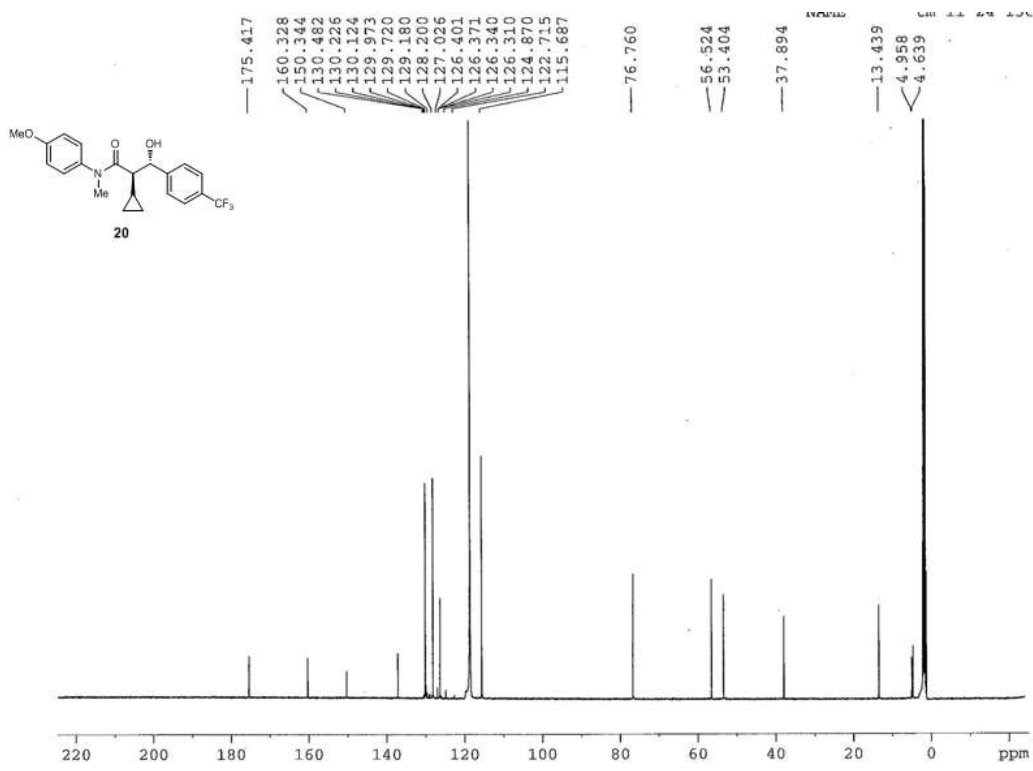

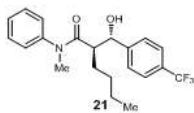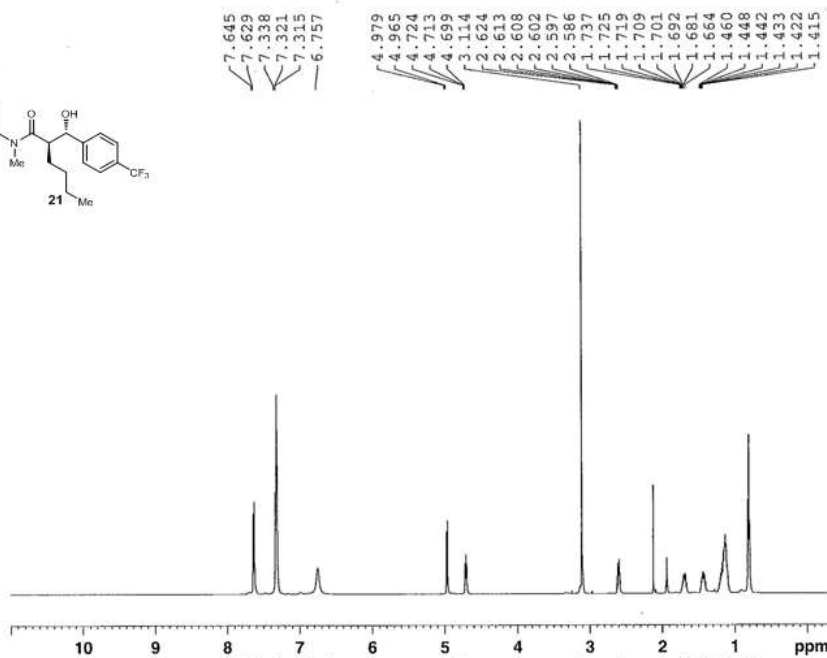

```

NAME      tm-1-207-acn-315-110
EXPNO     2
PROCNO    1
DATE_     20101106
Time      5.37
INSTRUM   spect
PROBHD    5 mm PABBI 1H/
PULPROG   zg
TD         59998
SOLVENT   CDCl3
NS         12
DS         0
SWH        10000.000 Hz
FIDRES     0.166672 Hz
AQ         2.9999499 sec
RG         16
DW         50.000 usec
DE         7.50 usec
TE         314.6 K
D1         5.00000000 sec
TD0        1

===== CHANNEL f1 =====
NUC1       1H
P1         5.35 usec
FL1        0.00 dB
SFO1       499.8729992 MHz
SI         32768
SF         499.8700191 MHz
WDW        EM
SSB        0
LB         0.30 Hz
GB         0
CB         0
PC         1.00

```

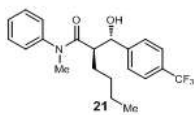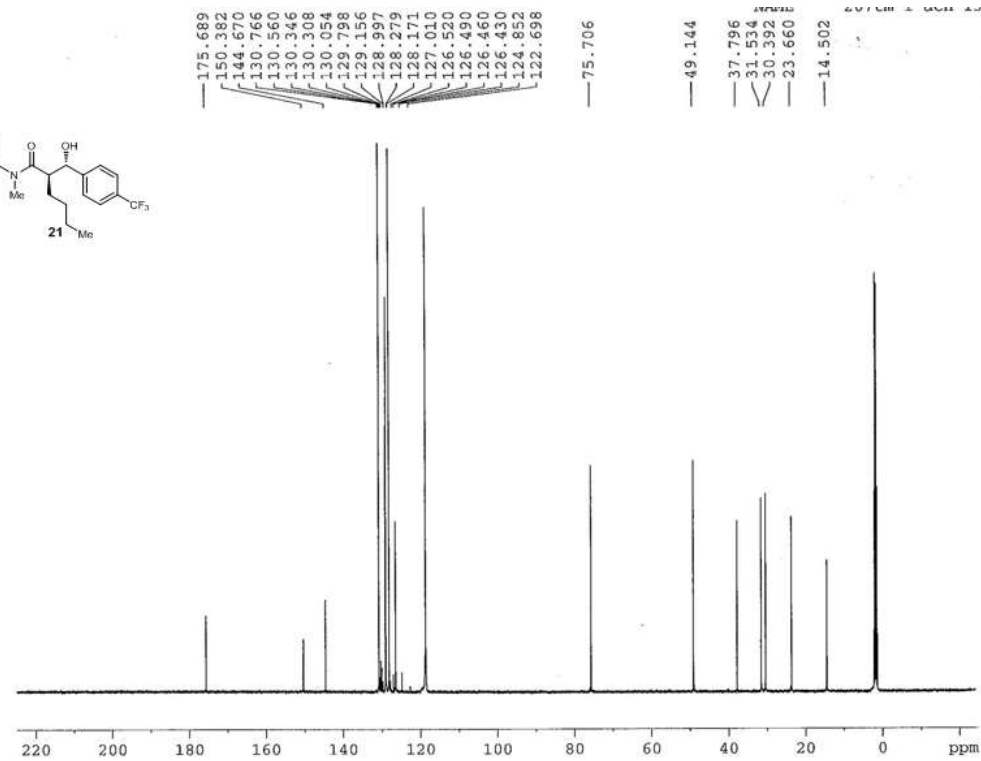

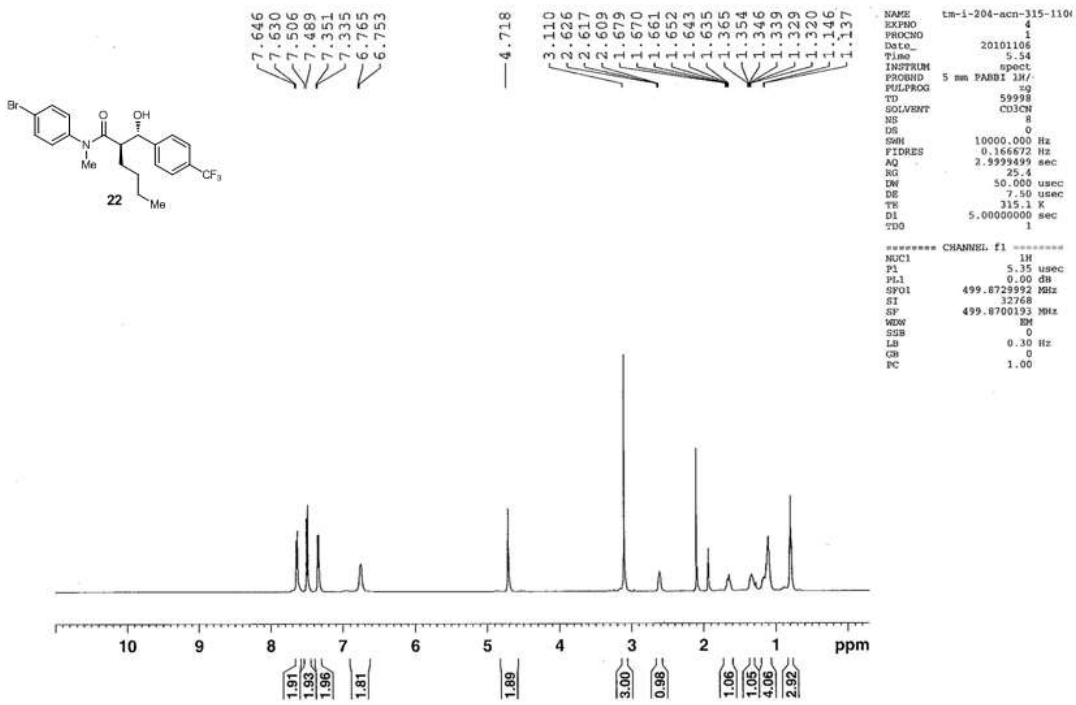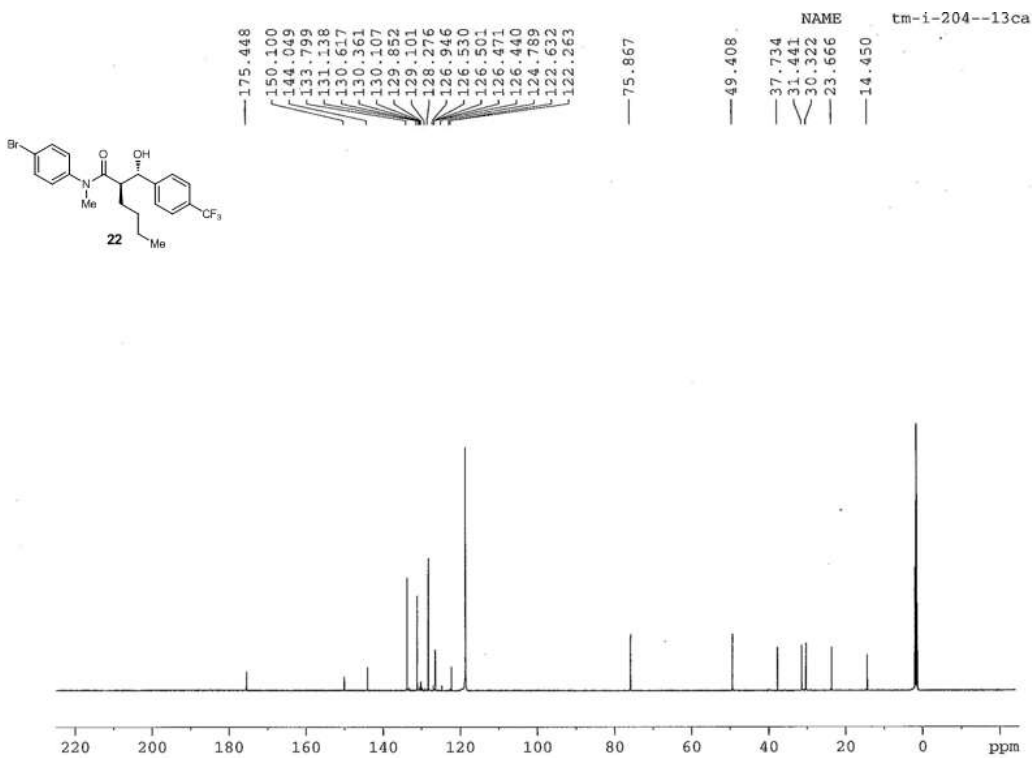

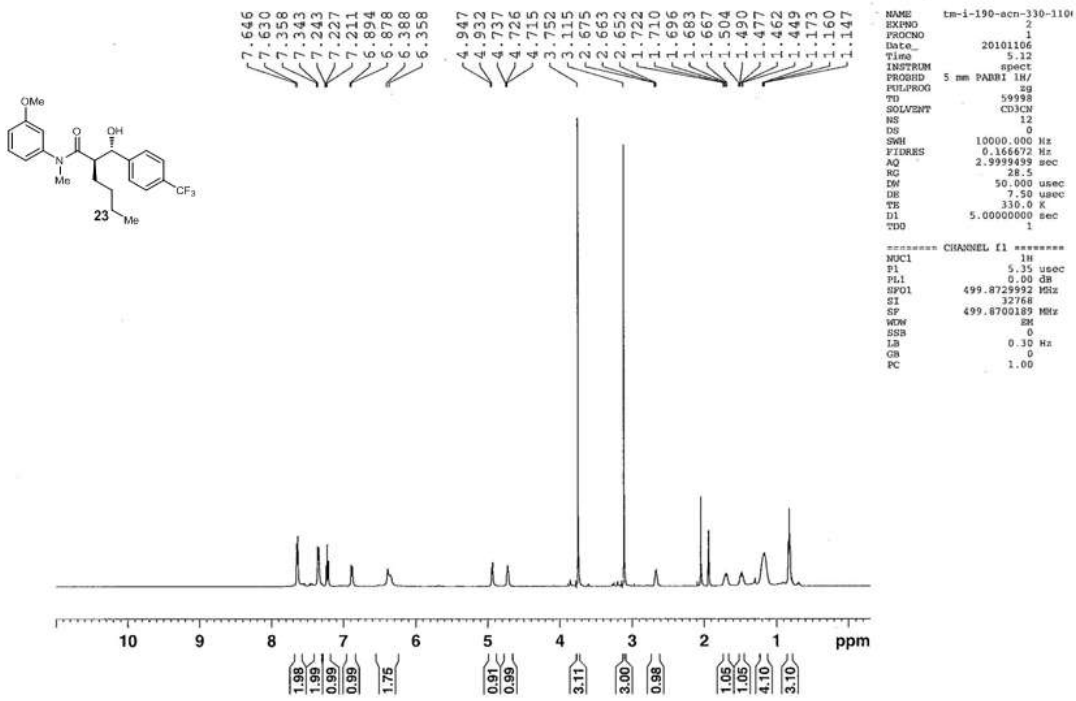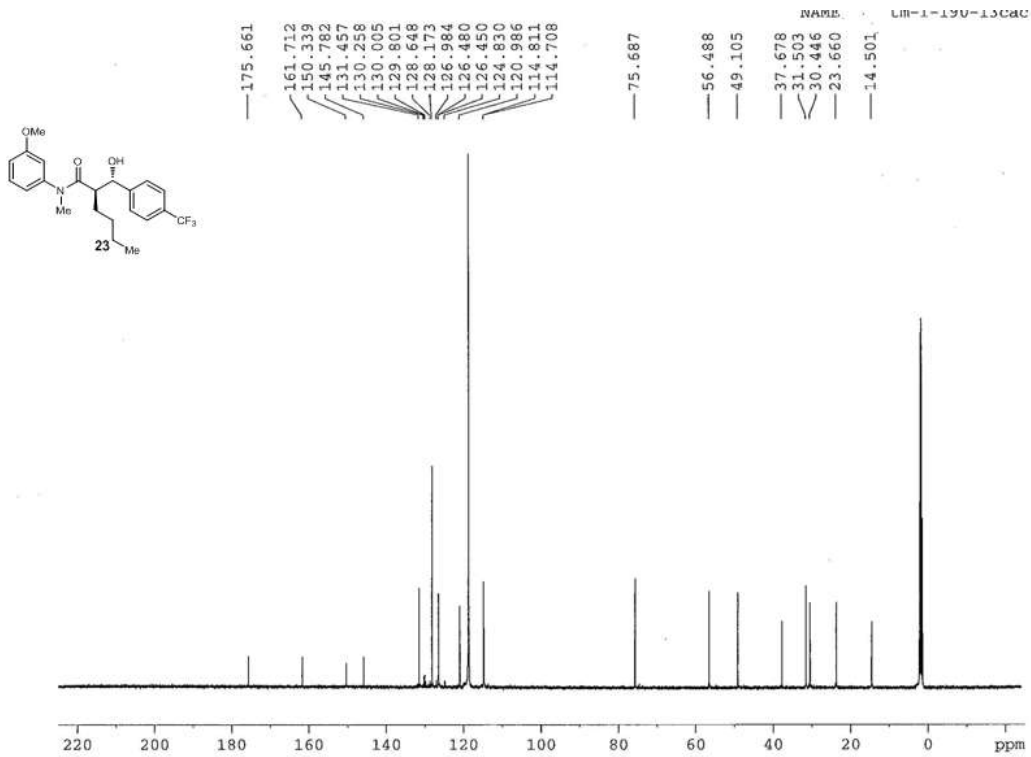

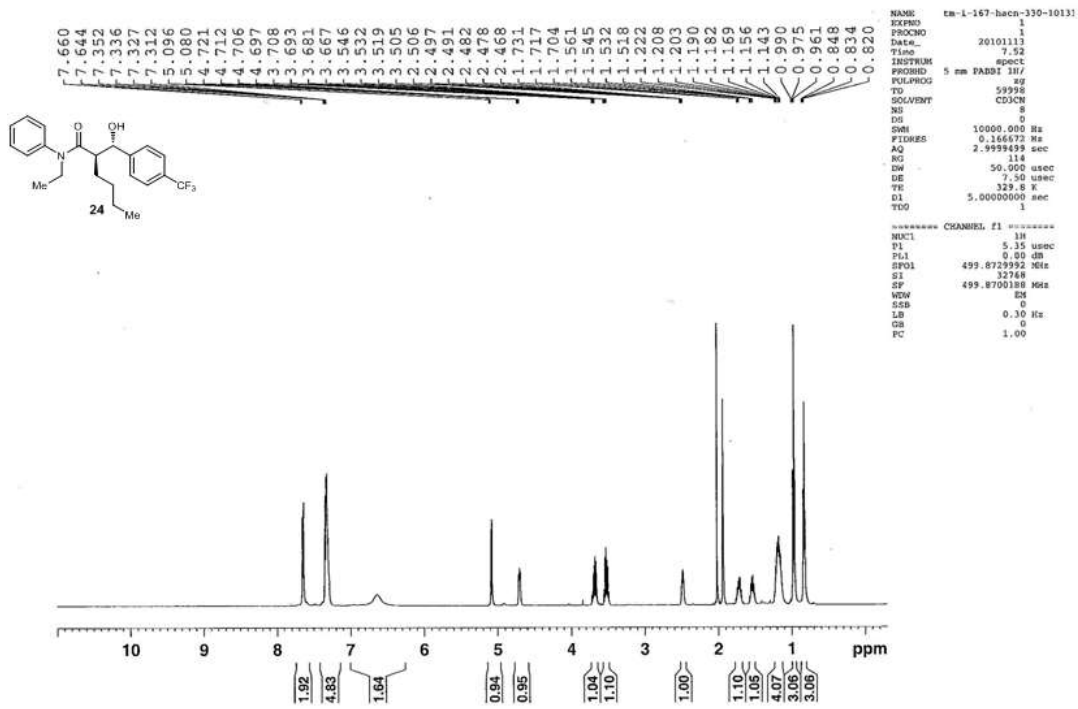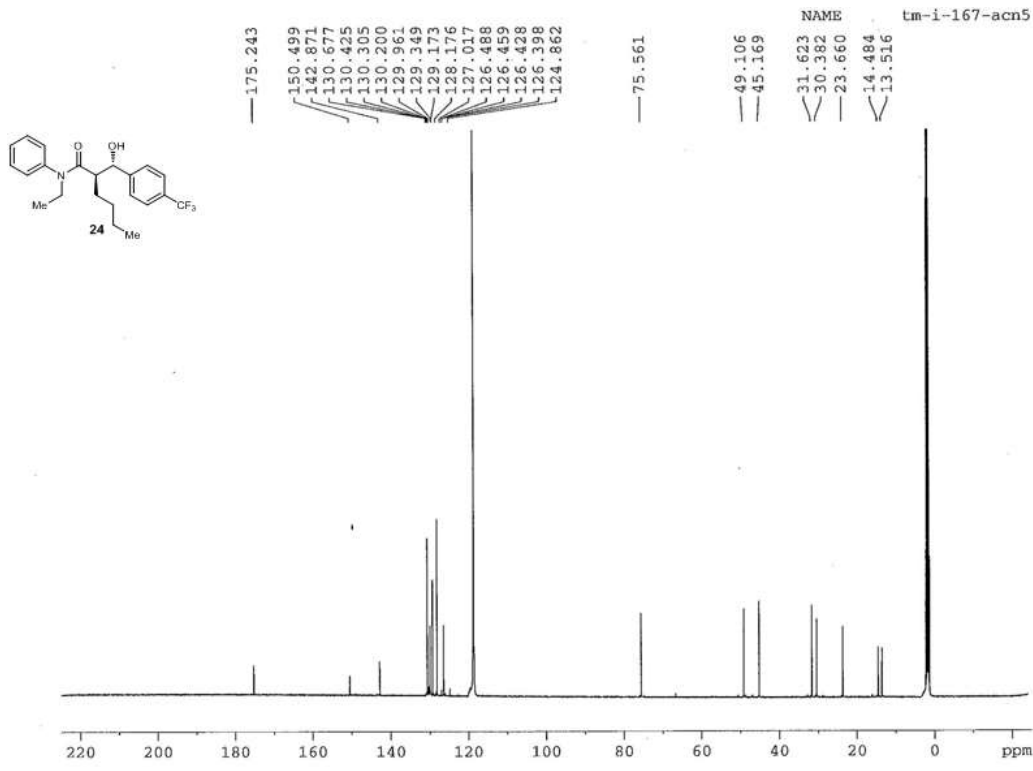



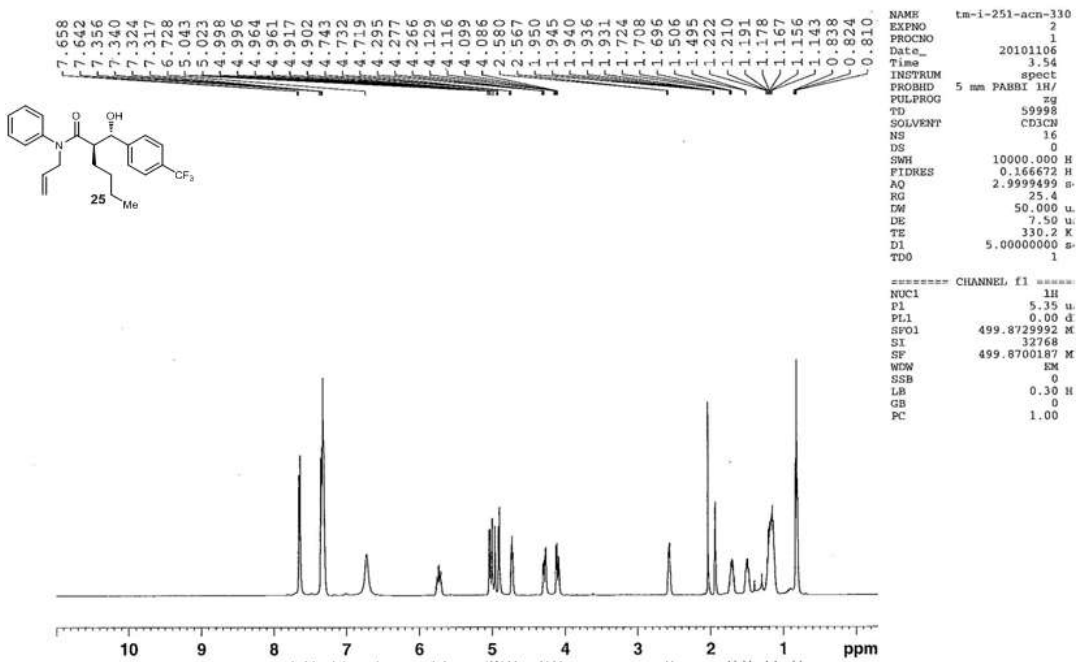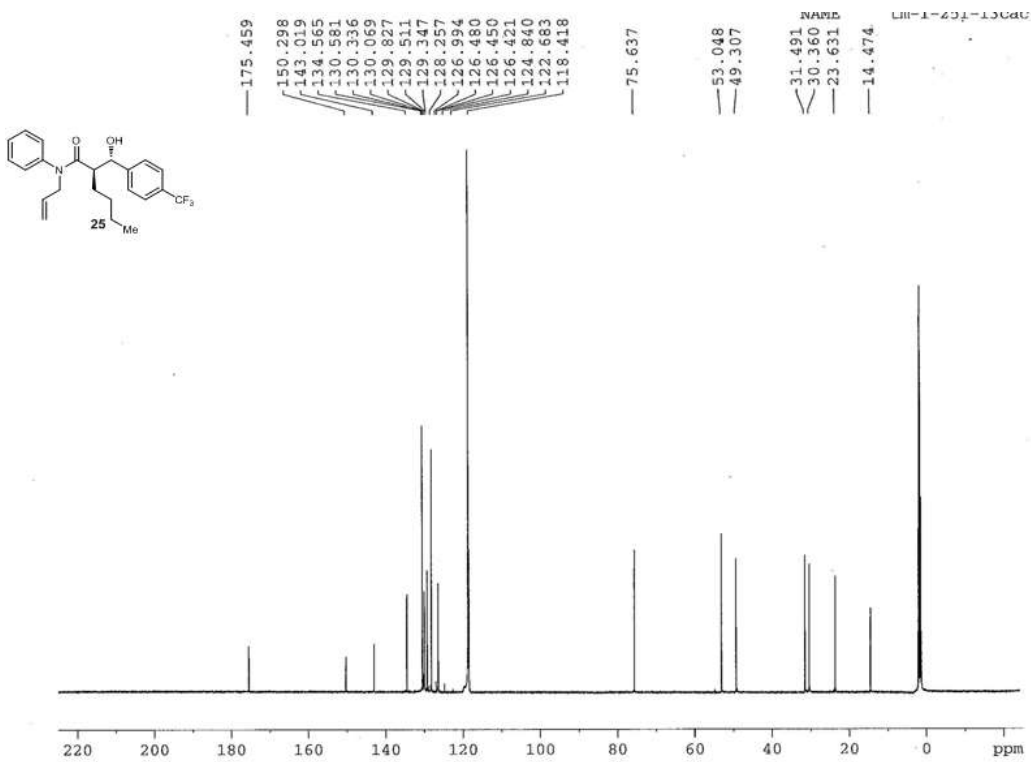

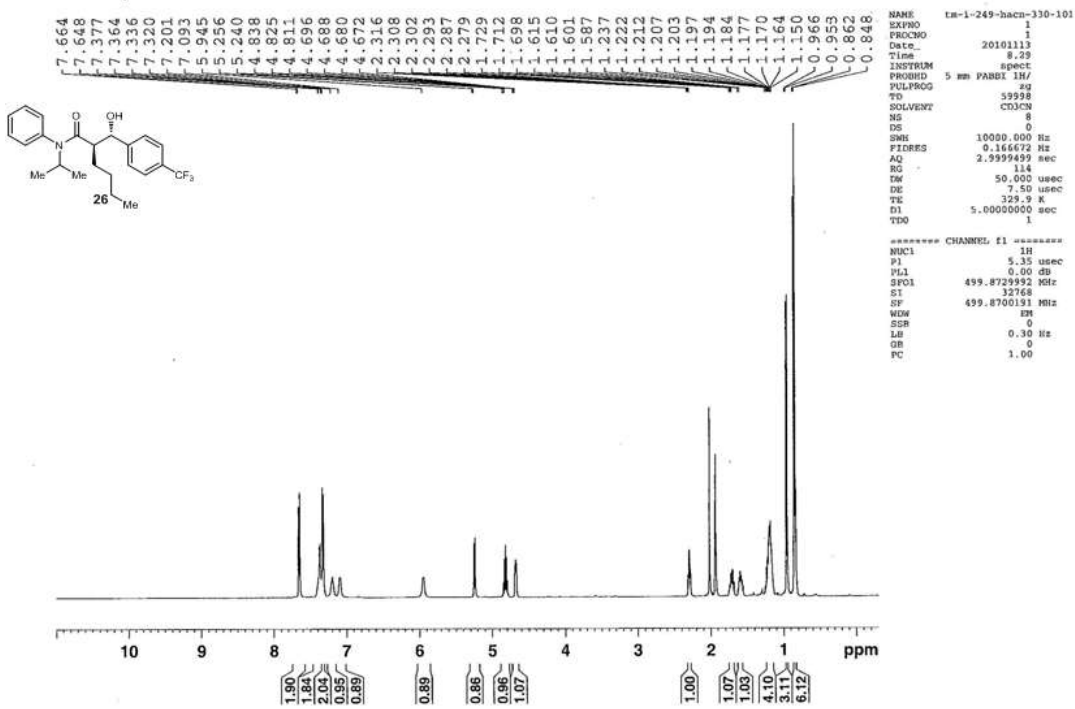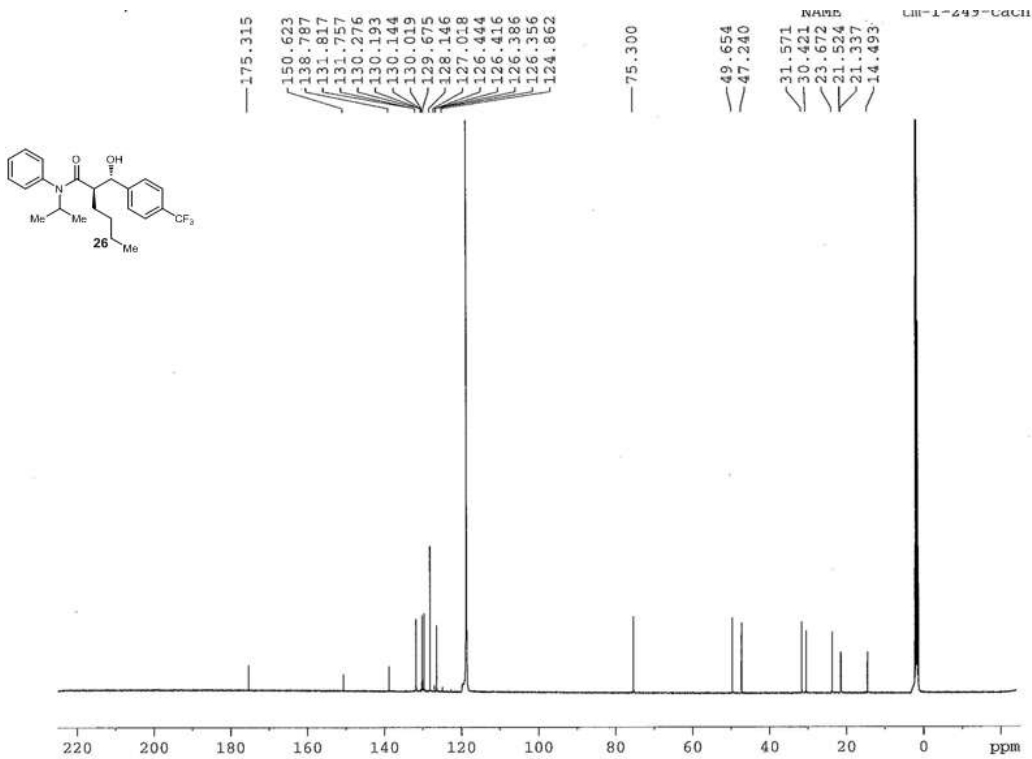

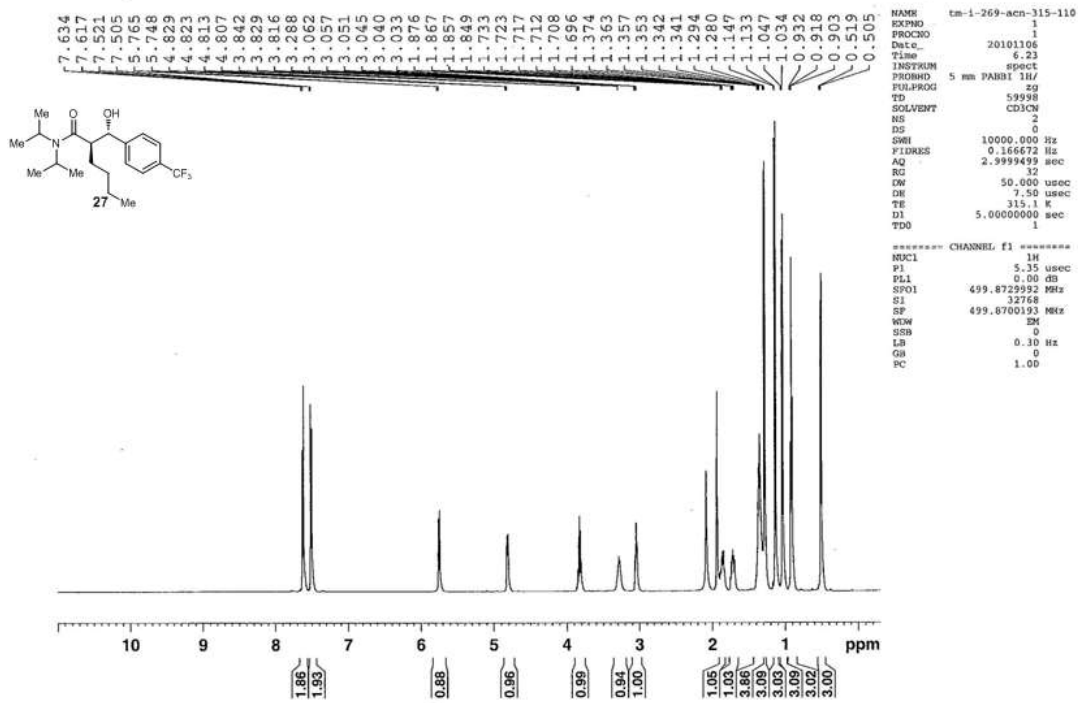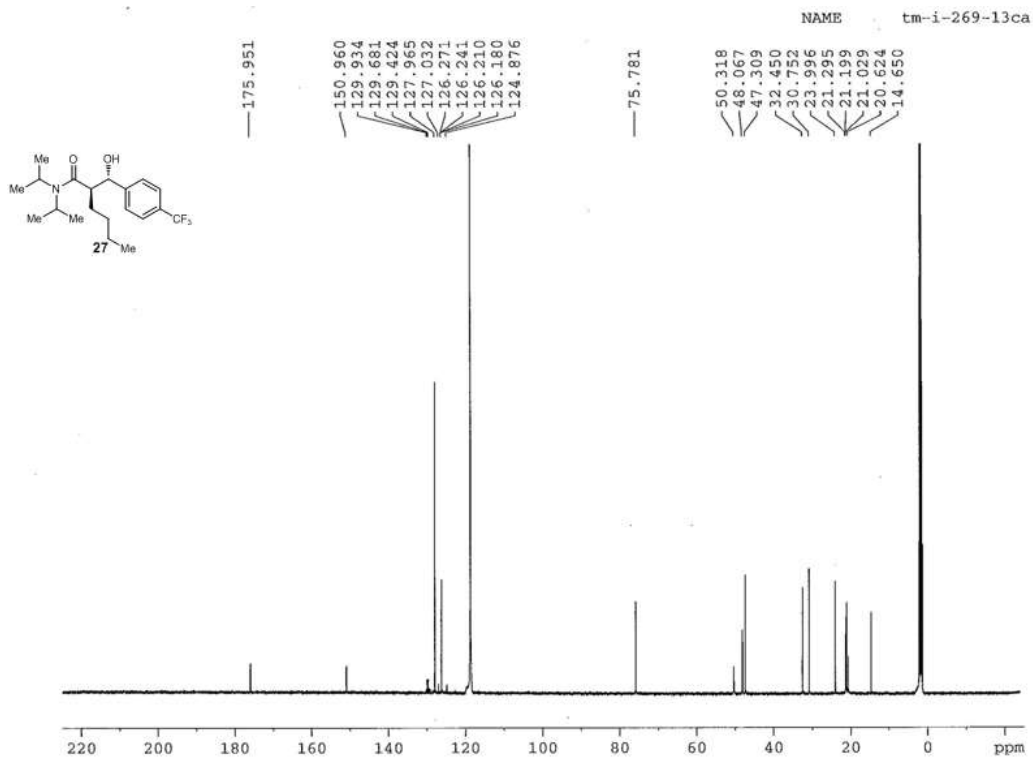

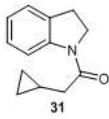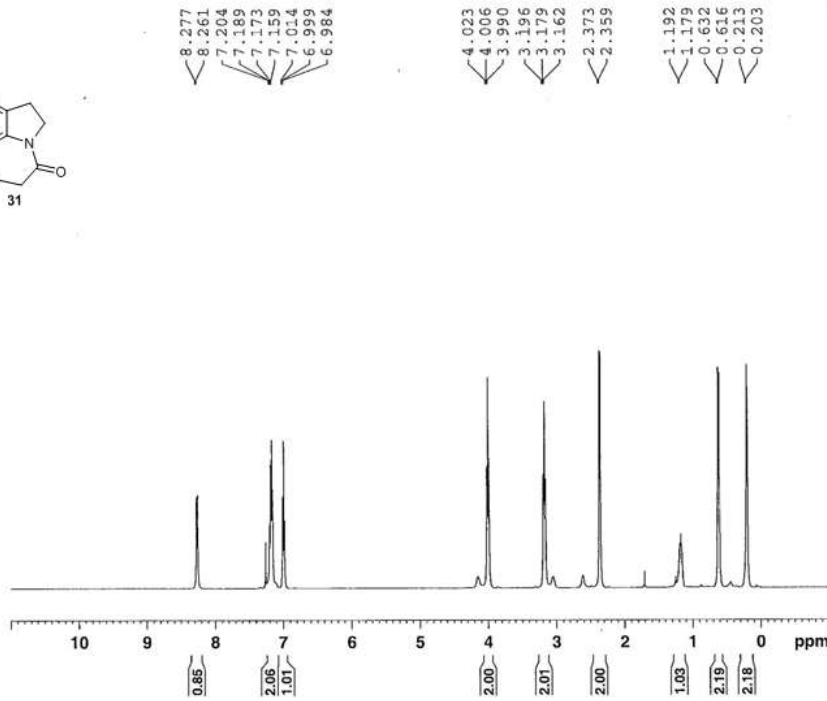

```

NAME      tm-1-296-1-111410
EXPNO    1
PROCNO   1
Date_    20101114
Time     6.24
INSTRUM  spect
PROBHD   5 mm PABBI 1H/
PULPROG  zg
TD        59998
SOLVENT  CDCl3
NS        8
DS        0
SWH       10000.000 Hz
FIDRES   0.166672 Hz
AQ        2.9999499 se
RG        57
DW        50.000 use
DE        7.50 use
TE        294.8 K
D1        5.00000000 se
TD0       1

----- CHANNEL f1 -----
NUC1     1H
P1       5.35 use
PL1     0.00 dB
SFO1    499.872992 MHz
SI       32768
SF      499.8700176 MHz
WDW      RM
SSB      0
LB       0.30 Hz
GB       0
PC       1.00

```

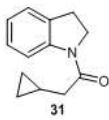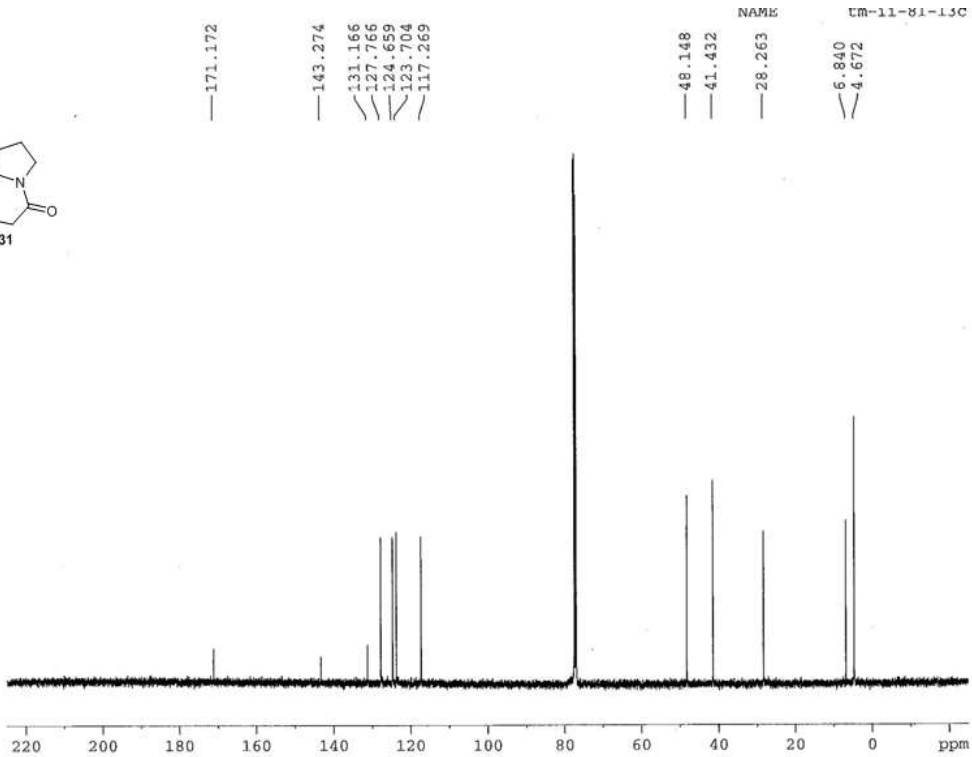

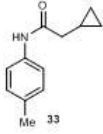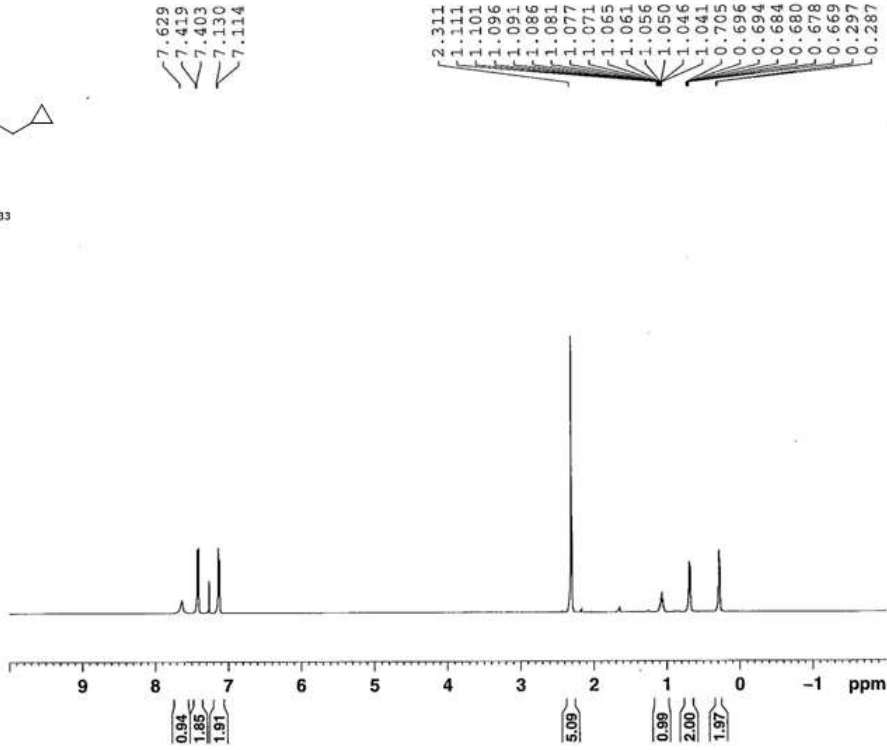

```

NAME tm-ii-80-012711
EXPNO 2
PROCNO 1
Date_ 20110127
Time 0.46
INSTRUM spect
PROBHD 5 mm PABBI 1H/
PULPROG zg
TD 59998
SOLVENT CDCl3
NS 8
DS 0
SWH 10000.000 Hz
FIDRES 0.166672 Hz
AQ 2.9999499 sec
RG 64
EW 50.000 usec
DE 7.50 usec
TE 294.5 K
D1 5.00000000 sec
TD0 1

```

```

===== CHANNEL f1 =====
NUC1 1H
P1 5.35 usec
PL1 0.00 dB
SFO1 499.8729992 MHz
SI 32768
SF 499.8700189 MHz
WDW EM
SSB 0
LB 0.30 Hz
GB 0
PC 1.00

```

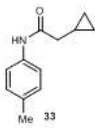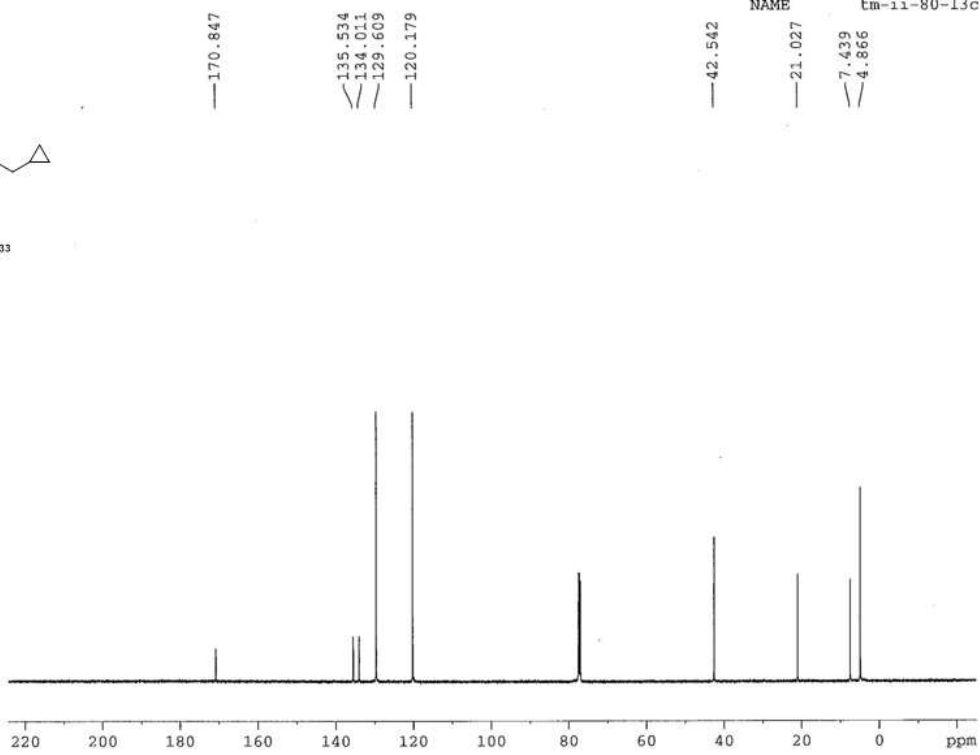

NAME tm-11-80-13c

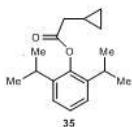

7.328  
7.215  
7.210  
7.197  
7.169  
7.155  
7.152

2.994  
2.980  
2.966  
2.953  
2.939  
2.908  
2.493  
1.285  
1.278  
1.269  
1.253  
1.239  
1.234  
1.229  
1.210  
1.196  
0.671  
0.661  
0.660  
0.649  
0.645  
0.634  
0.326  
0.316

```

NAME      Em-11-85-012711
EXPNO     1
PROCNO    1
Date_     20110127
Time      0.38
INSTRUM   spect
PROBHD    5 mm PABBI 1H/
PULPROG   zg
TD         59998
SOLVENT   CDCl3
NS         8
DS         0
SWH        10000.060 Hz
FIDRES     0.166672 Hz
AQ         2.9999499 sec
RG         101.6
DM         50.000 use
DE         7.50 use
TE         294.7 K
DL         5.00000000 sec
TDO        1
  
```

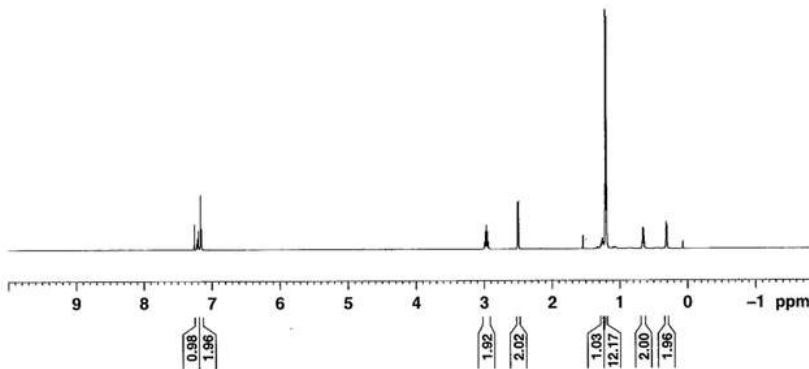

```

===== CHANNEL f1 =====
NUC1      1H
PI         5.35 use
PL1        0.00 dB
SFO1      499.8729992 MHz
SI         32768
SF         499.8700179 MHz
WDW        EM
SFB        0
LB         0.30 Hz
GB         0
PC         1.00
  
```

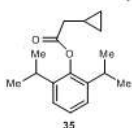

171.981

145.881  
140.544

126.638  
124.070

39.779

27.713  
23.869  
22.953

7.468  
4.808

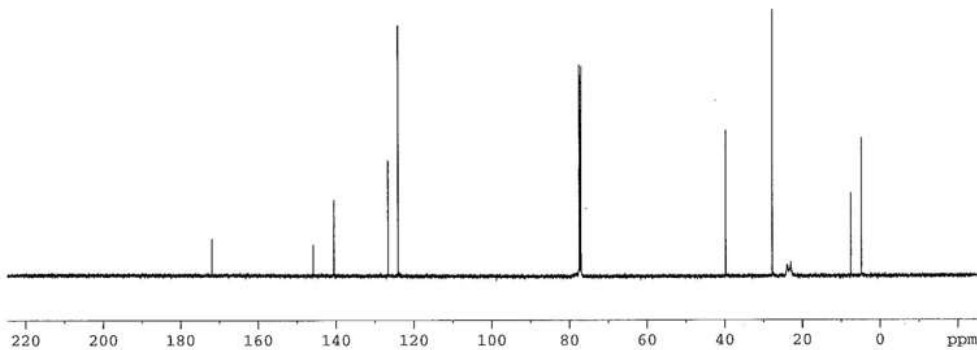

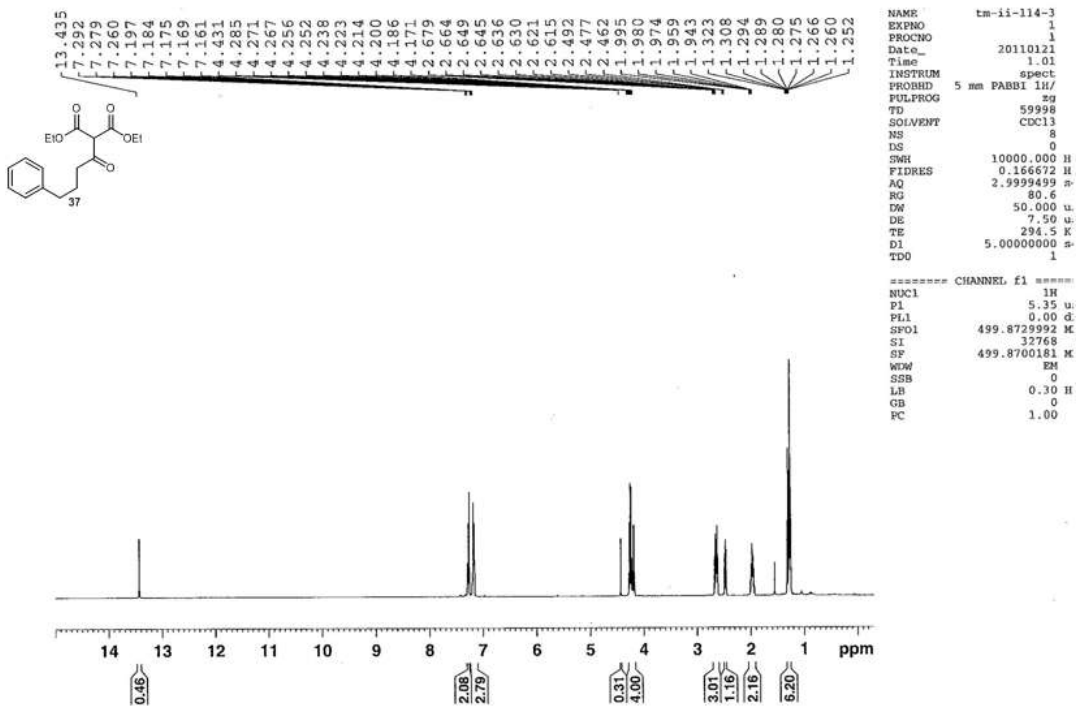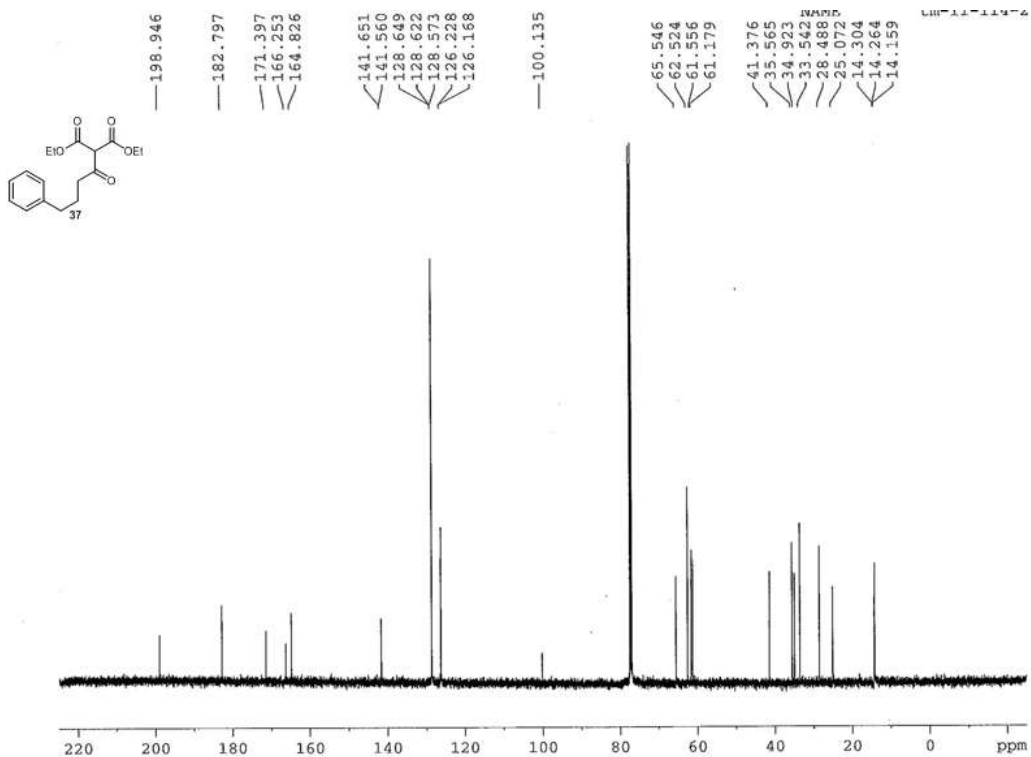

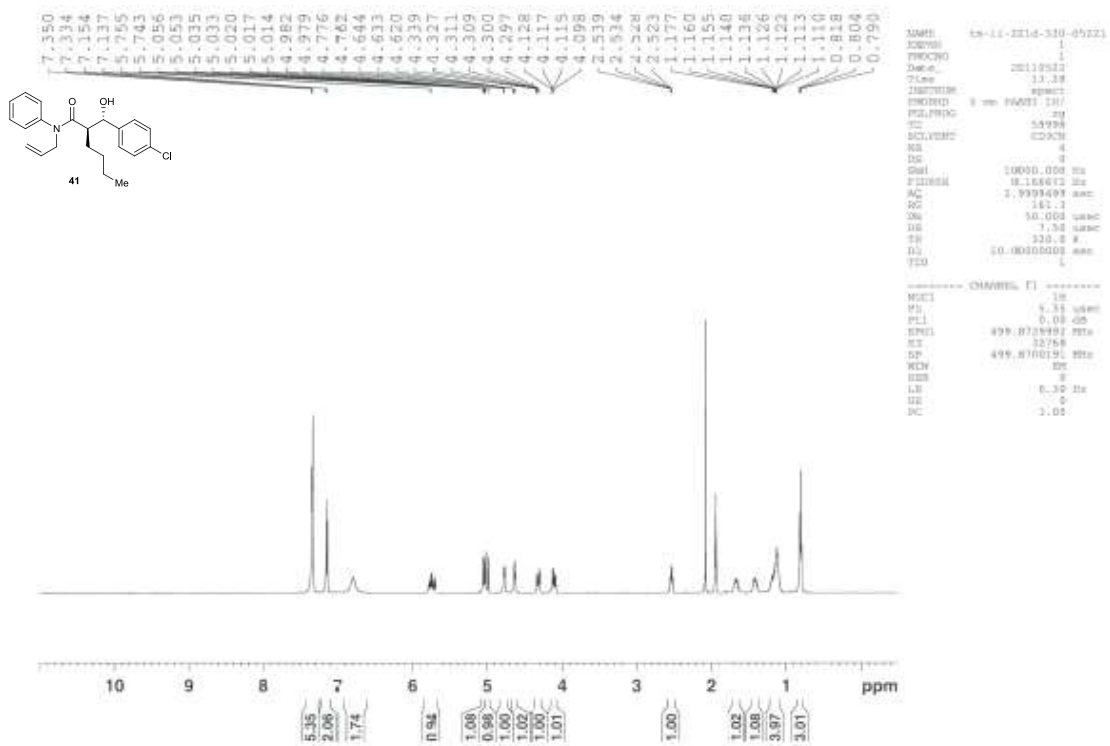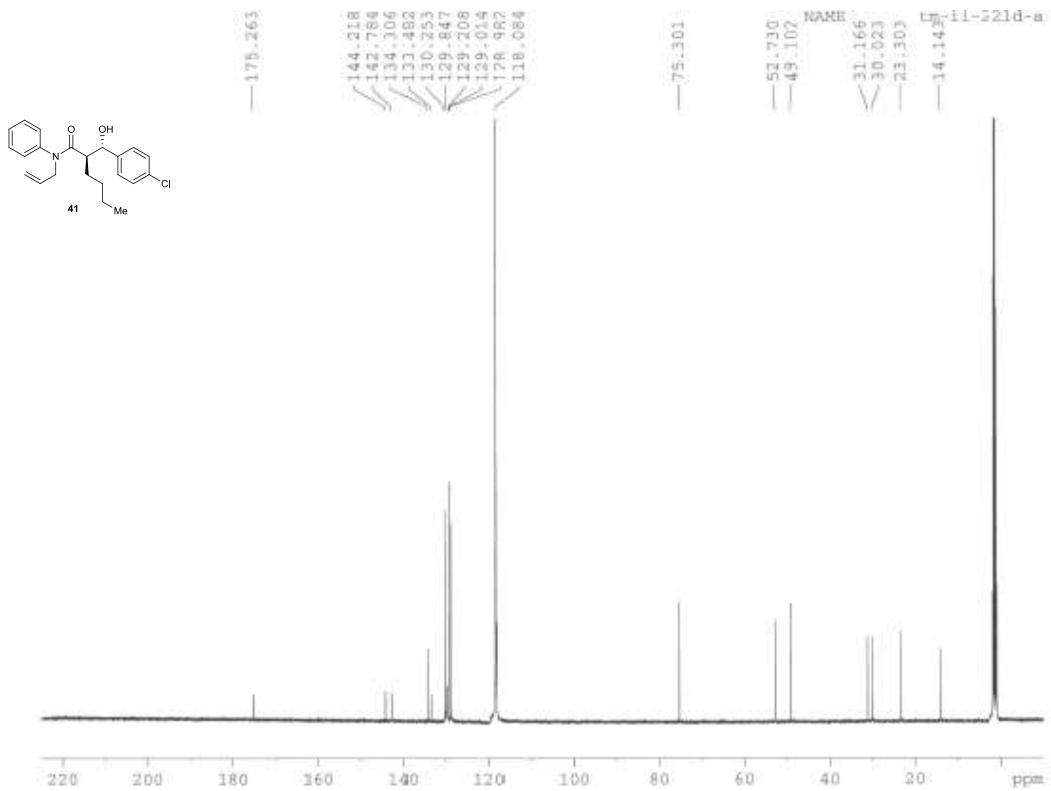



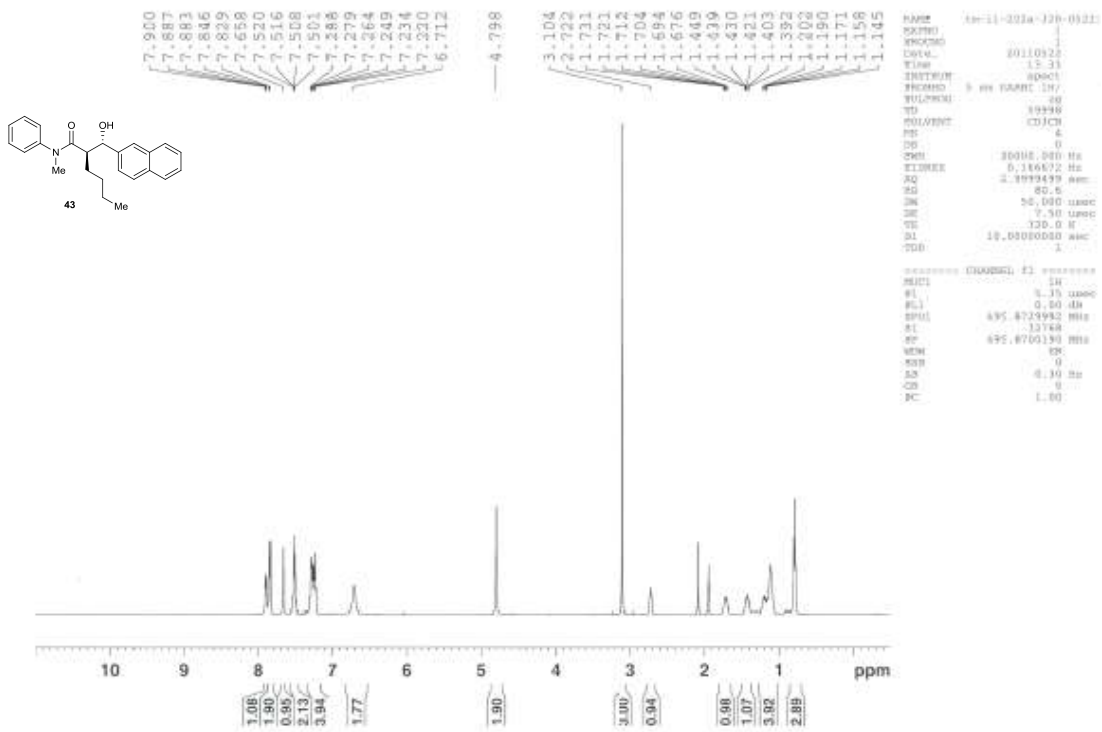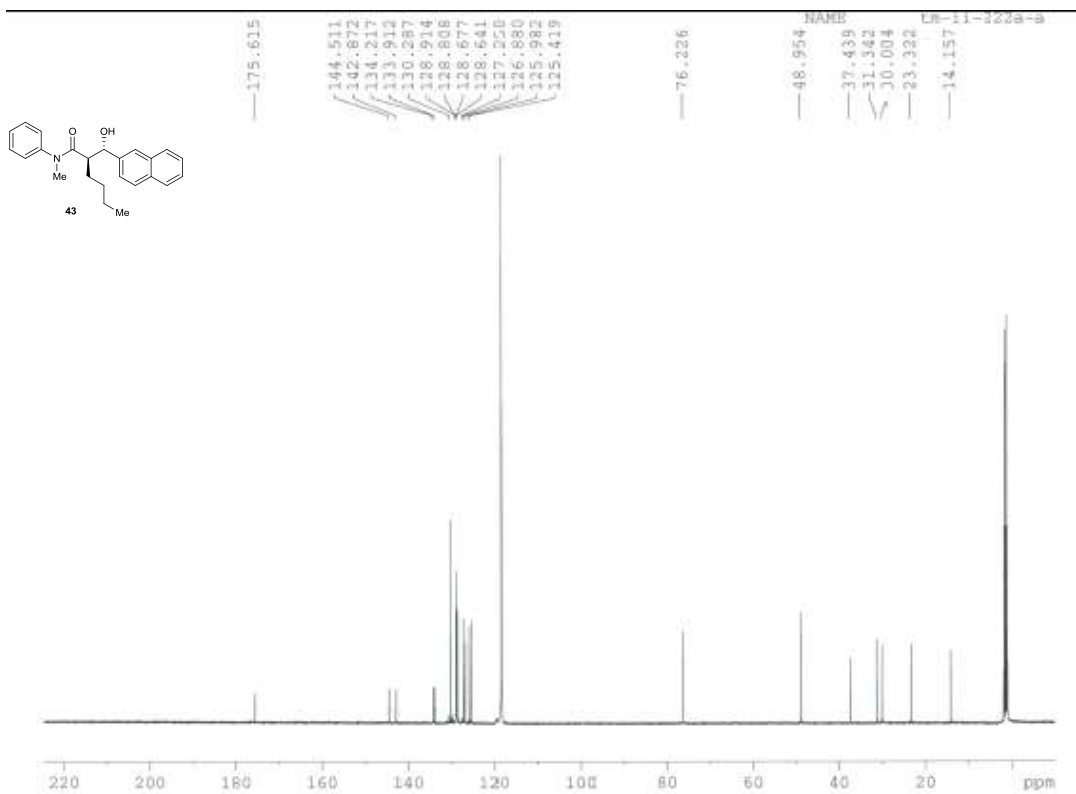

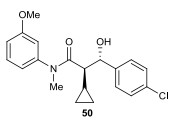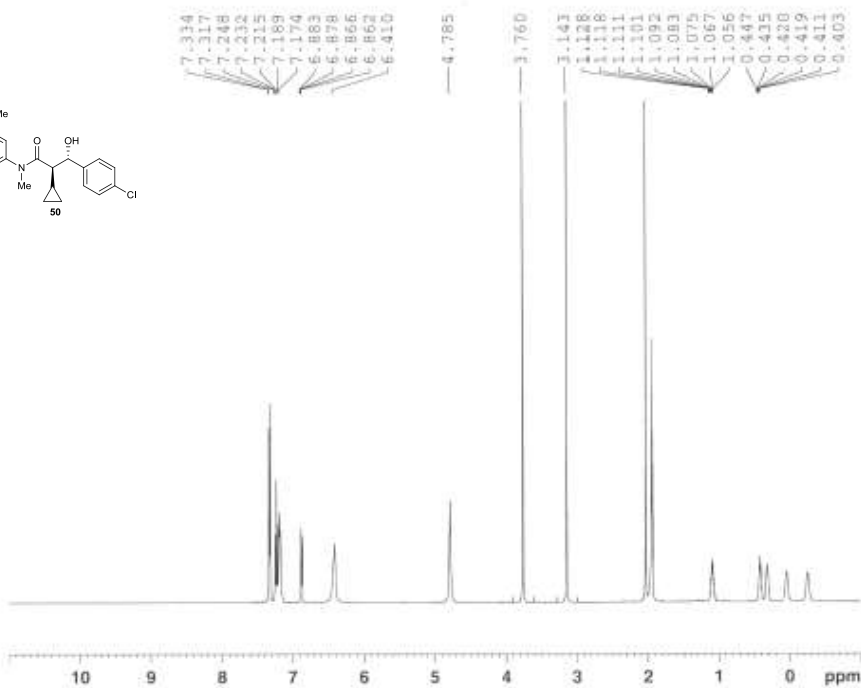

```

NAME: 06-11-0579-130-05221
EXPNO: 1
PROCNO: 1
Date_ : 20110527
Time: 11.08
INSTRUM: spect
PROBHD: 5 mm PABBI 1H/
PULPROG: zgpg30
RG: 327.5
SOLVENT: chcl3
NS: 819
DS: 4
SWH: 10000.000 MHz
FIDRES: 0.166672 Hz
AQ: 2.9959499 sec
RG: 181
AQ: 30.000 usec
SFO: 500.136499 MHz
NUC1: 13C
NUC2: 13C
PCPD: 495.8729992 MHz
PCPD: 12768
PCPD: 495.81010186 MHz
PCPD: 50
PCPD: 0
PCPD: 0.30 Hz
PCPD: 0
PCPD: 1.00
===== CHANNEL f1 =====
PXC1: 13
PC1: 5.25 usec
PC1: 0.00 dB
PC1: 495.8729992 MHz
PC1: 12768
PC1: 495.81010186 MHz
PC1: 50
PC1: 0
PC1: 0.30 Hz
PC1: 0
PC1: 1.00

```

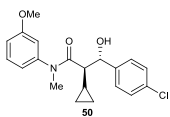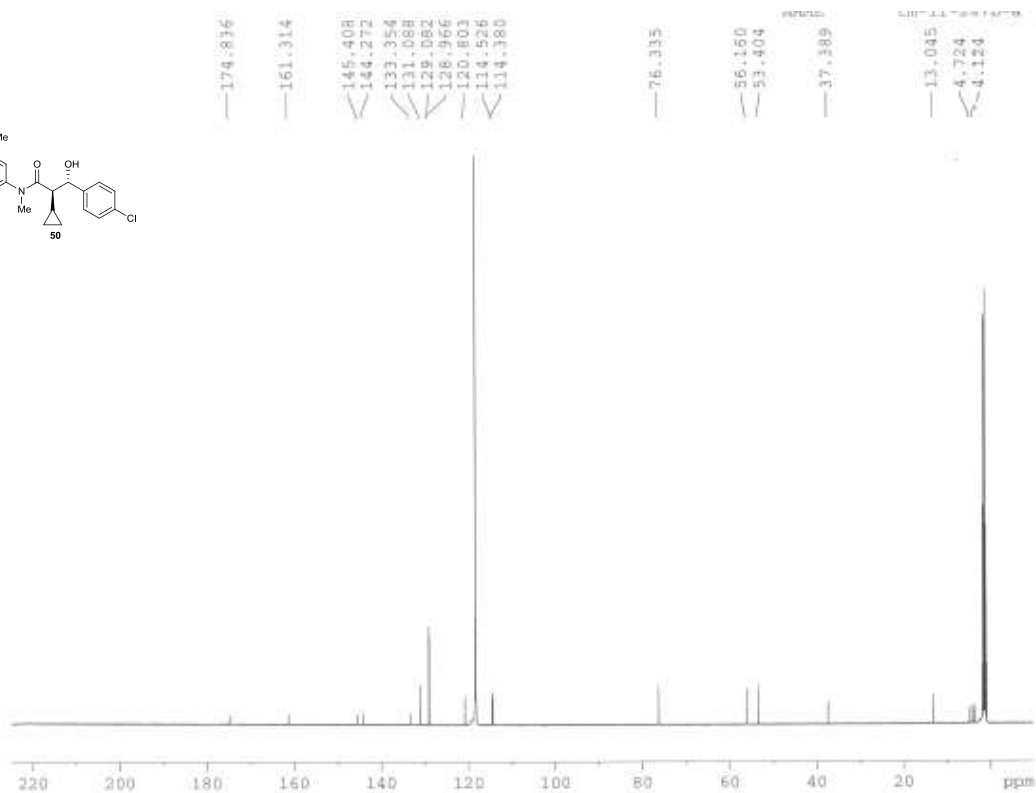



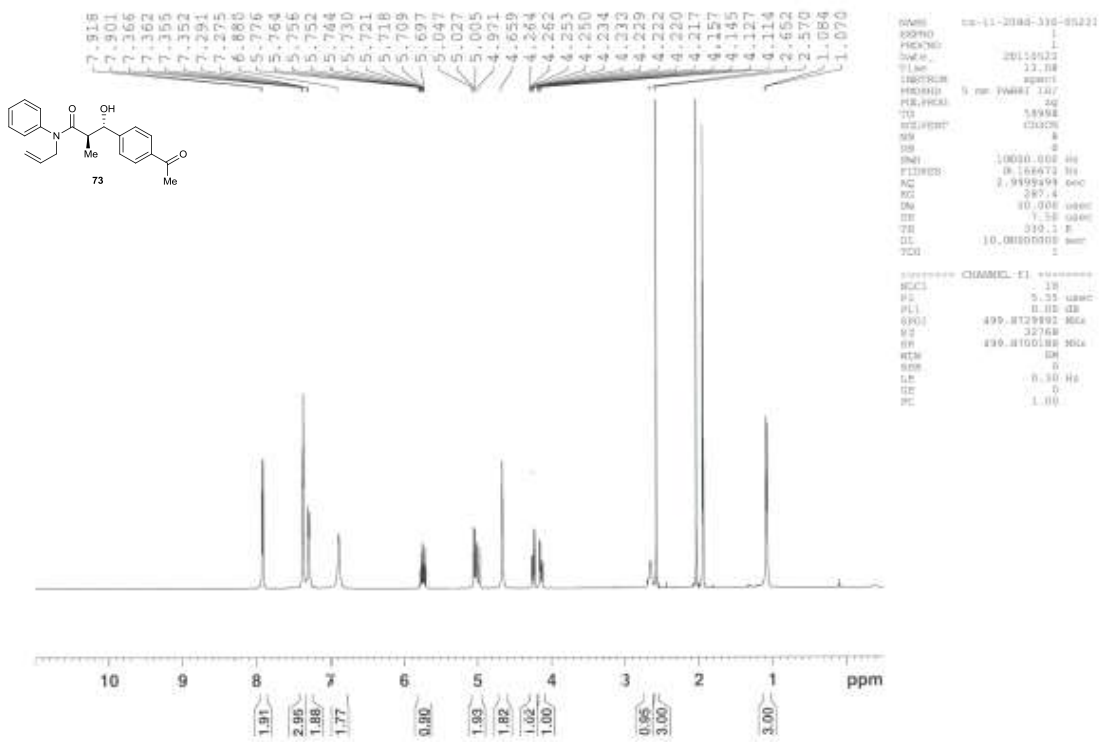

```

NAME      ee-11-2088-336-05221
EXPNO    1
PROCNO   1
DATE_    20150223
TIME     13.08
INSTRUM  spect
PROBHD   5 mm 1H/13
PULPROG  zgpg30
TD       58984
SOLVENT  dmsc
NS       8
DS       2
SWH      10000.000 MHz
FIDRES   0.164671 Hz
AQ       2.9199499 sec
RG        287.4
DQ       10.000 usec
DE        1.58 usec
TE        310.1 K
DT       10.0000000 sec
DELTA    1
===== CHANNEL f1 =====
NUC1      13
P1        12.50 usec
PL1       0.00 dB
SFO1     499.8729892 MHz
WDW       EM
SSB       0
RG        330.8100188 MHz
DE        0
TE        310.1 K
DT       0
DELTA    1.00
  
```

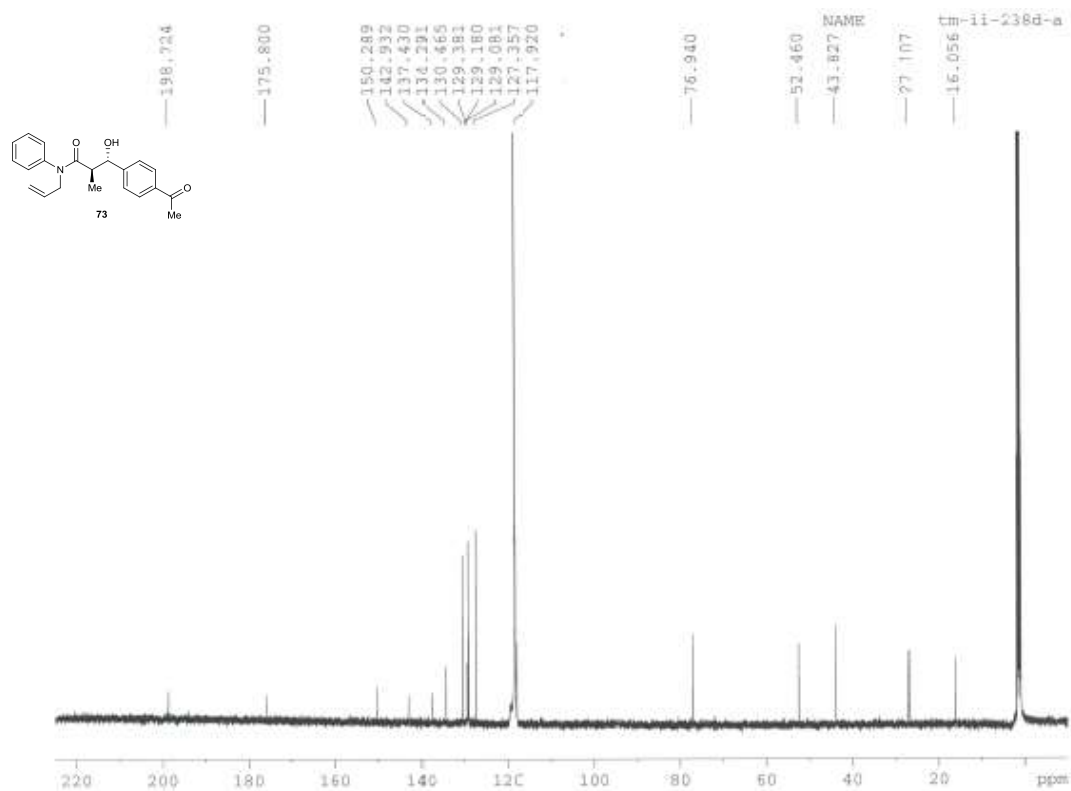

Supplement: NIHMS335201-supplement-1.pdf [file NIHMS335201-supplement-1.pdf]
