# Supplementary material
Source: PubMed Central journal article supplement (PMC3243075)

# checkCIF/PLATON report

No syntax errors found.    CIF dictionary    Interpreting this report

## Datablock: mont01s

---

Bond precision:    C-C = 0.0031 A

Wavelength=0.71073

Cell:            a=10.305(2)            b=11.201(3)            c=11.779(3)  
                  alpha=63.547(4)        beta=65.449(4)        gamma=66.927(4)  
Temperature:    200 K

|                | Calculated      | Reported        |
|----------------|-----------------|-----------------|
| Volume         | 1070.9(4)       | 1071.0(4)       |
| Space group    | P -1            | ?               |
| Hall group     | -P 1            | ?               |
| Moiety formula | C22 H26 F3 N O3 | ?               |
| Sum formula    | C22 H26 F3 N O3 | C22 H26 F3 N O3 |
| Mr             | 409.44          | 409.44          |
| Dx,g cm-3      | 1.270           | 1.270           |
| Z              | 2               | 2               |
| Mu (mm-1)      | 0.101           | 0.101           |
| F000           | 432.0           | 432.0           |
| F000'          | 432.27          |                 |
| h,k,lmax       | 13,14,15        | 13,14,15        |
| Nref           | 5351            | 5170            |
| Tmin,Tmax      |                 |                 |
| Tmin'          |                 |                 |

Correction method= Not given

Data completeness= 0.966

Theta(max)= 28.370

R(reflections)= 0.0586( 3057)

wR2(reflections)= 0.1594( 5170)

S = 0.927

Npar= 293

---

The following ALERTS were generated. Each ALERT has the format

**test-name\_ALERT\_alert-type\_alert-level.**

Click on the hyperlinks for more details of the test.

---

### Alert level A

|                                                                    |                             |       |       |
|--------------------------------------------------------------------|-----------------------------|-------|-------|
| PLAT213_ALERT_2_A Atom F3B                                         | has ADP max/min Ratio ..... | 11.70 | prola |
| PLAT052_ALERT_1_A (Proper) Absorption Correction Method Missing .. |                             | ?     |       |
| PLAT053_ALERT_1_A Minimum Crystal Dimension Missing (or Error) ... |                             | ?     |       |
| PLAT054_ALERT_1_A Medium Crystal Dimension Missing (or Error) ...  |                             | ?     |       |
| PLAT055_ALERT_1_A Maximum Crystal Dimension Missing (or Error) ... |                             | ?     |       |
| PLAT093_ALERT_1_A No su's on H-atoms, but refinement reported as . |                             |       | mixed |

PLAT122\_ALERT\_1\_A No \_symmetry\_space\_group\_name\_H-M Given ..... ?

---

**Alert level B**

PLAT242\_ALERT\_2\_B Check Low Ueq as Compared to Neighbors for C1

---

**Alert level C**

PLAT029\_ALERT\_3\_C \_diffrn\_measured\_fraction\_theta\_full Low ..... 0.97  
PLAT230\_ALERT\_2\_C Hirshfeld Test Diff for N1 -- C14 .. 5.50 su  
PLAT120\_ALERT\_1\_C Reported SPGR ? Inconsistent with Explicit P-1  
PLAT194\_ALERT\_1\_C Missing \_cell\_measurement\_reflns\_used datum .... ?  
PLAT195\_ALERT\_1\_C Missing \_cell\_measurement\_theta\_max datum .... ?  
PLAT196\_ALERT\_1\_C Missing \_cell\_measurement\_theta\_min datum .... ?

---

**Alert level G**

PLAT301\_ALERT\_3\_G Note: Main Residue Disorder ..... 9.00 Perc.  
PLAT154\_ALERT\_1\_G The su's on the Cell Angles are Equal (x 10000) 400 Deg.  
PLAT764\_ALERT\_4\_G Overcomplete CIF Bond List Detected (Rep/Expd) . 1.18 Ratio  
PLAT793\_ALERT\_4\_G The Model has Chirality at C8 (Verify) .... R  
PLAT793\_ALERT\_4\_G The Model has Chirality at C9 (Verify) .... S

- 
- 7 **ALERT level A** = In general: serious problem  
1 **ALERT level B** = Potentially serious problem  
6 **ALERT level C** = Check and explain  
5 **ALERT level G** = General alerts; check

- 11 **ALERT type 1** CIF construction/syntax error, inconsistent or missing data  
3 **ALERT type 2** Indicator that the structure model may be wrong or deficient  
2 **ALERT type 3** Indicator that the structure quality may be low  
3 **ALERT type 4** Improvement, methodology, query or suggestion  
0 **ALERT type 5** Informative message, check
-

Datablock mont01s - ellipsoid plot

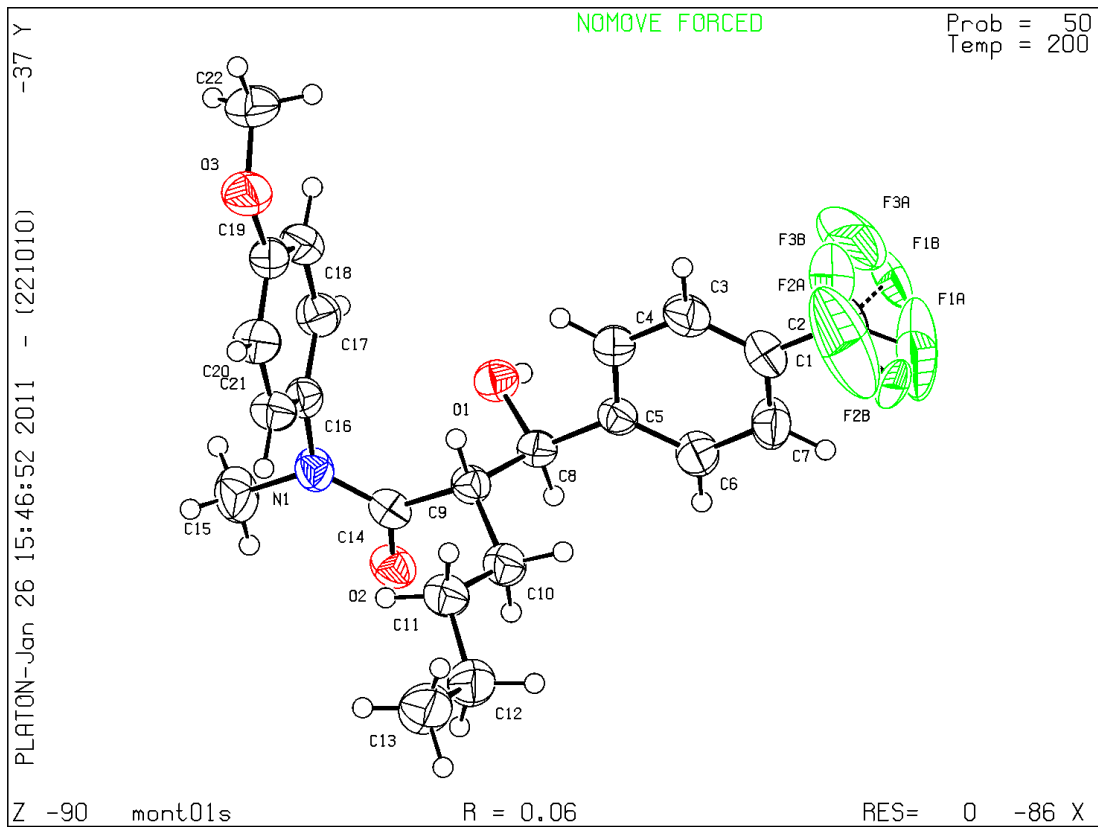

Supplement: NIHMS335201-supplement-3.pdf [file NIHMS335201-supplement-3.pdf]
