# Supplementary material
Source: PubMed Central journal article supplement (PMC3243075)
Supplement: NIHMS335201-supplement-10.pdf [file NIHMS335201-supplement-10.pdf]

**Figure 1**

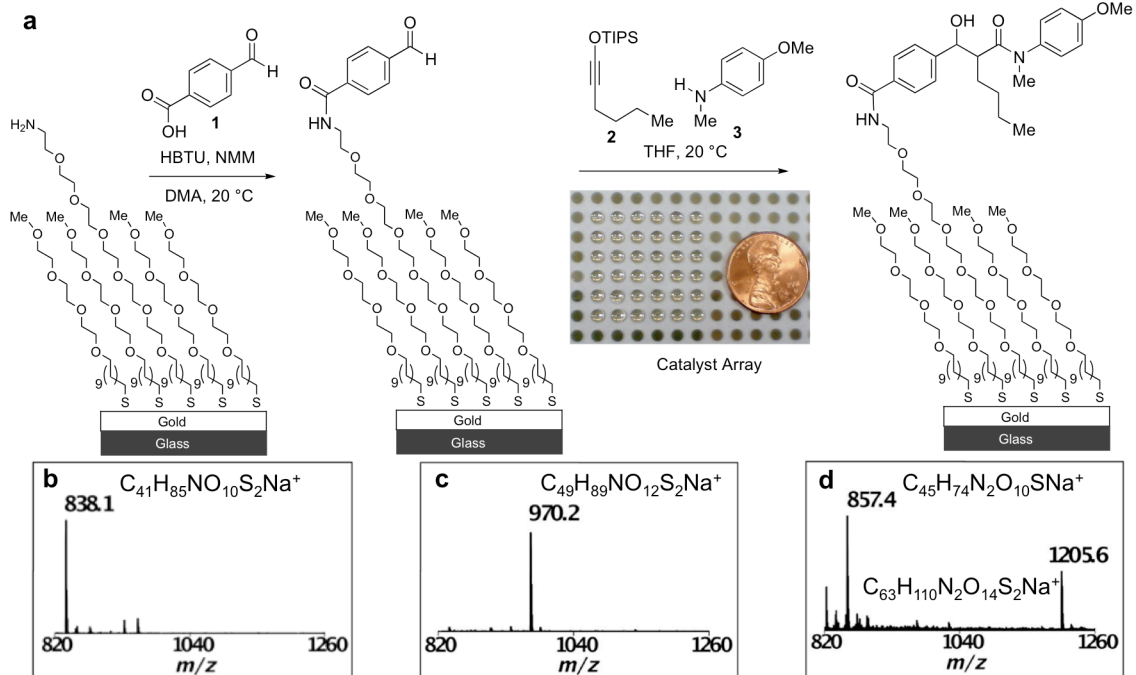

**Figure 2**

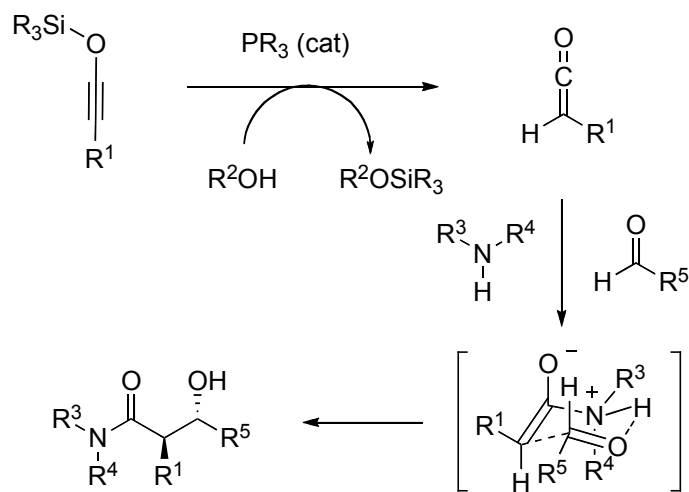

**Figure 3**

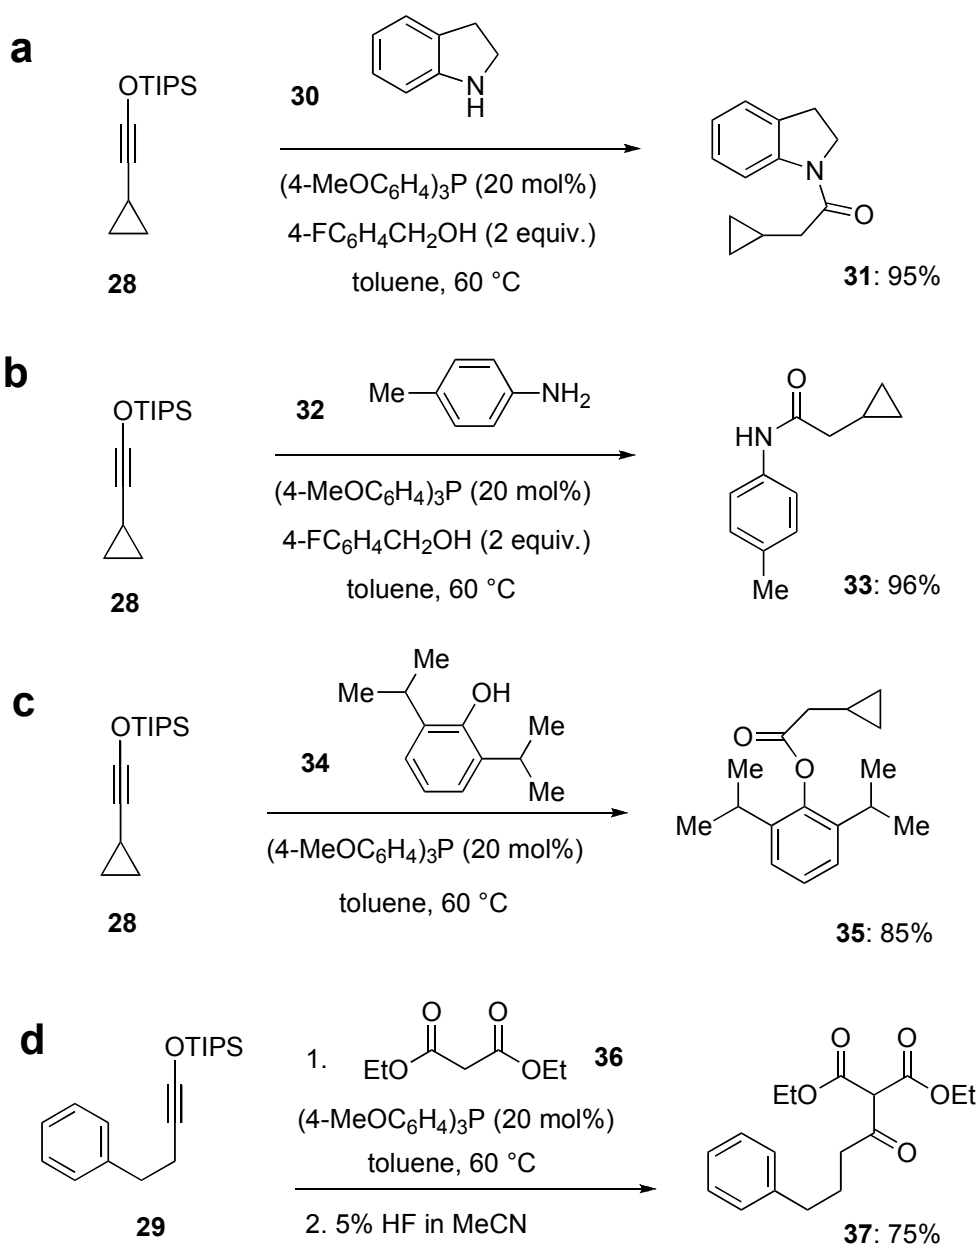

**Table 1**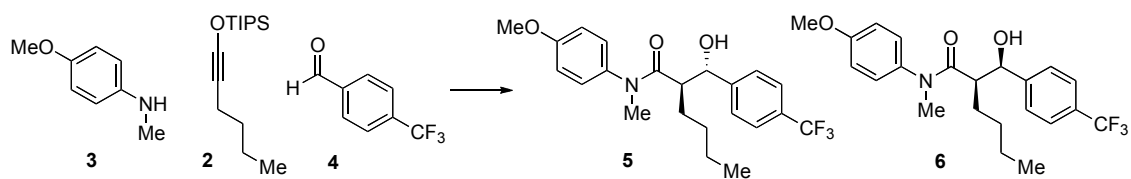

| Entry | Catalyst (mol%)                                           | Additive (Equiv.)                                       | Solvent, Temp (°C) | Conversion | d.r.  |
|-------|-----------------------------------------------------------|---------------------------------------------------------|--------------------|------------|-------|
| 1     | Pd(PPh <sub>3</sub> ) <sub>4</sub> (5)                    | MeOH (5)                                                | THF (20)           | 56%        | 85:15 |
| 2     | Pd(OAc) <sub>2</sub> (5)                                  | MeOH (5)                                                | toluene (20)       | < 2%       |       |
| 3     | Pd(PCy <sub>3</sub> ) <sub>2</sub> (5)                    | MeOH (5)                                                | toluene (20)       | 35%        | 85:15 |
| 4     | Pd(PPh <sub>3</sub> ) <sub>4</sub> (5)                    | MeOH (5)                                                | toluene (60)       | 65%        | 85:15 |
| 5     | Ph <sub>3</sub> P (20)                                    | MeOH (5)                                                | toluene (60)       | 50%        | 88:12 |
| 6     | (4-MeC <sub>6</sub> H <sub>4</sub> ) <sub>3</sub> P (10)  | MeOH (2.5)                                              | toluene (60)       | 60%        | 91:9  |
| 7     | (4-MeOC <sub>6</sub> H <sub>4</sub> ) <sub>3</sub> P (10) | MeOH (2.5)                                              | toluene (60)       | 75%        | 91:9  |
| 8     | (4-MeOC <sub>6</sub> H <sub>4</sub> ) <sub>3</sub> P (20) | BnOH (2)                                                | toluene (60)       | 89%        | 91:9  |
| 9     | (4-MeOC <sub>6</sub> H <sub>4</sub> ) <sub>3</sub> P (20) | 4-FC <sub>6</sub> H <sub>4</sub> CH <sub>2</sub> OH (2) | toluene (60)       | 96%        | 91:9  |

**Table 2**

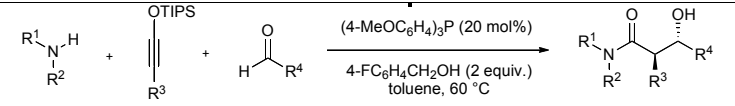

| Entry | R <sup>1</sup> | R <sup>2</sup> | R <sup>3</sup> | R <sup>4</sup> | Major Product | Yield, % | d.r.  |
|-------|----------------|----------------|----------------|----------------|---------------|----------|-------|
| 1     | Me             |                |                |                | <b>5</b>      | 87       | 91:9  |
| 2     | Me             |                |                |                | <b>7</b>      | 87       | 88:12 |
| 3     | Me             |                |                |                | <b>8</b>      | 73       | 88:12 |
| 4     | Me             |                |                |                | <b>9</b>      | 63       | 91:9  |
| 5     | Me             |                |                |                | <b>10</b>     | 74       | 93:7  |
| 6     | Me             |                |                |                | <b>11</b>     | 68       | 91:9  |
| 7     | Me             |                |                |                | <b>12</b>     | 66       | 84:16 |
| 8     | Me             |                |                |                | <b>13</b>     | 59       | 88:12 |
| 9     | Me             |                |                |                | <b>14</b>     | 63       | 90:10 |
| 10    | Me             |                |                |                | <b>15</b>     | 58       | 91:9  |
| 11    | Me             |                |                |                | <b>16</b>     | 44       | 84:16 |
| 12    | Me             |                | Me             |                | <b>17</b>     | 75       | 85:15 |
| 13    | Me             |                |                |                | <b>18</b>     | 72       | 91:9  |
| 14    | Me             |                |                |                | <b>19</b>     | 80       | 91:9  |
| 15    | Me             |                |                |                | <b>20</b>     | 87       | 91:9  |
| 16    | Me             |                |                |                | <b>21</b>     | 76       | 91:9  |
| 17    | Me             |                |                |                | <b>22</b>     | 74       | 95:5  |
| 18    | Me             |                |                |                | <b>23</b>     | 61       | 91:9  |
| 19    |                |                |                |                | <b>24</b>     | 78       | 88:12 |
| 20    |                |                |                |                | <b>25</b>     | 57       | 89:11 |
| 21    |                |                |                |                | <b>26</b>     | 52       | 80:20 |
| 22    |                |                |                |                | <b>27</b>     | 30       | 63:37 |
